# Supplementary material for: ecBSU1: A Genome-scale Enzyme-constrained Model of <em>Bacillus subtilis</em> based on the ECMpy Workflow
Source: Preprints.org preprint supplement (doi:10.20944/preprints202211.0351.v1), 2022-11-18
Supplement: Supplementary file 1 [file supplementary]

## Sheet: Table S1
Table S1. Correspondence between subunit descriptions and subunit numbers in UniProt.
Keywords	Subunit number
Monomer	1
Homodimer; Homodimers; Heterotetramer;	2
Homotrimer	3
Homotetramer; Heterooctamer	4
Homopentamer	5
Homohexamer; Homohexameric	6
Heterooligomer; 7 subunits	7
Homooctamer	8
Homodecamer	10
Dodecamer	12
Eicosamer	20
24-polypeptide; 24 subunits	24

## Sheet: Table S2
Table S2. EC number modification.
Id	Equation	EC code(old)	EC code(new)
4HOXPACMON	4hoxpac_c + h_c + nadh_c + o2_c --> 34dhpacet_c + h2o_c + nad_c	1.14.13.3	1.14.14.9
3HPAOX	3hoxpac_c + h_c + nadh_c + o2_c --> 34dhpacet_c + h2o_c + nad_c	1.14.13.3	1.14.14.9
FDH	for_c + nad_c --> co2_c + nadh_c	1.2.1.2	1.17.1.9
HDS	2mecdp_c + protdt_c --> h2mb4p_c + h2o_c + protds_c	1.17.4.3	1.17.7.1
R05884	h2mb4p_c + h_c + nadph_c --> h2o_c + ipdp_c + nadp_c	1.17.1.2	1.17.7.4
R07219	h2mb4p_c + h_c + nadph_c --> dmpp_c + h2o_c + nadp_c	1.17.1.2	1.17.7.4
ACOAD1	b2coa_c + h_c + nadh_c --> btcoa_c + nad_c	1.3.99.2	1.3.8.1
ACOADH2	2.0 ibcoa_c + o2_c --> 2.0 2mp2coa_c + 2.0 h2o_c	1.3.99.2	1.3.8.1
ACOAD20	2.0 m2bcoa_c + o2_c --> 2.0 2mb2coa_c + 2.0 h2o_c	1.3.99.2	1.3.8.1
ACOAD7	h_c + hdd2coa_c + nadh_c --> nad_c + pmtcoa_c	1.3.99.2	1.3.8.1
ACOAD2	h_c + hx2coa_c + nadh_c --> hexscoa_c + nad_c	1.3.99.2	1.3.8.1
ACOAD3	h_c + nadh_c + oc2coa_c --> nad_c + occoa_c	1.3.99.2	1.3.8.1
ACOAD4_1	dc2coa_c + h_c + nadh_c --> dccoa_c + nad_c	1.3.99.2	1.3.8.1
ACOAD5	dd2coa_c + h_c + nadh_c --> ddcacoa_c + nad_c	1.3.99.2	1.3.8.1
ACOAD6	h_c + nadh_c + td2coa_c --> nad_c + tdcoa_c	1.3.99.2	1.3.8.1
CPPPGO2	2.0 amet_c + cpppg3_c <=> 2.0 co2_c + 2.0 dad_5_c + 2.0 met__L_c + pppg9_c	1.3.99.22	1.3.98.3
R01253	fad_c + pro__L_c <=> 1pyr5c_c + fadh2_c	1.5.99.8	1.5.5.2
NTRIR2x	5.0 h_c + 3.0 nadh_c + no2_c --> 2.0 h2o_c + 3.0 nad_c + nh4_c	1.7.99.4;1.7.1.4	1.7.1.1;1.7.1.4
NTRIR2y	5.0 h_c + 3.0 nadph_c + no2_c --> 2.0 h2o_c + 3.0 nadp_c + nh4_c	1.7.99.4;1.7.1.4	1.7.1.1;1.7.1.4
CYSDS	cys__L_c + h2o_c --> h2s_c + nh4_c + pyr_c	4.4.1.8	4.4.1.13
CYSTL	cyst__L_c + h2o_c --> hcys__L_c + nh4_c + pyr_c	4.4.1.8	4.4.1.13
ATPS4r	adp_c + 4.0 h_e + pi_c --> atp_c + h2o_c + 3.0 h_c	3.6.3.14	7.1.2.2
Cut1	atp_c + cu2_c + h2o_c --> adp_c + cu2_e + h_c + pi_c	3.6.3.4	7.2.2.9
ZNabc	atp_c + h2o_c + zn2_e --> adp_c + h_c + pi_c + zn2_c	3.6.3.4;3.6.3.3;3.6.3.5	7.2.2.9;7.2.2.21;7.2.2.12
CD2abc	atp_c + cd2_c + h2o_c --> adp_c + cd2_e + h_c + pi_c	3.6.3.4;3.6.3.3;3.6.3.5	7.2.2.9;7.2.2.21;7.2.2.12
HG2abc	atp_c + h2o_c + hg2_c --> adp_c + h_c + hg2_e + pi_c	3.6.3.4;3.6.3.3;3.6.3.5	7.2.2.9;7.2.2.21;7.2.2.12
rxn10344	atp_c + h2o_c + pb_c --> adp_c + h_c + pb_e + pi_c	3.6.3.4;3.6.3.3;3.6.3.5	7.2.2.9;7.2.2.21;7.2.2.12
rxn10194	cpd15666_c + prenoN_acid_c <=> cpd15667_c + udcpp_w_c	3.6.3.40	7.5.2.4
rxn10195	cpd15666_c + prenoN_ated_c <=> cpd15669_c + udcpp_w_c	3.6.3.40	7.5.2.4
rxn10196	cpd15663_c + cpd15666_c <=> cpd15668_c + udcpp_w_c	3.6.3.40	7.5.2.4
GLYBabc	atp_c + glyb_e + h2o_c --> adp_c + glyb_c + h_c + pi_c	3.6.3.32	7.6.2.9
CTBTabcpp	atp_c + ctbt_e + h2o_c --> adp_c + ctbt_c + h_c + pi_c	3.6.3.32	7.6.2.9
rxn05193	atp_c + btbet_e + h2o_c --> adp_c + btbet_c + h_c + pi_c	3.6.3.32	7.6.2.9
ARSENBabc	arsbet_e + atp_c + h2o_c --> adp_c + arsbet_c + h_c + pi_c	3.6.3.32	7.6.2.9
GBBTNabc	4tmeabutn_e + atp_c + h2o_c --> 4tmeabutn_c + adp_c + h_c + pi_c	3.6.3.32	7.6.2.9
rxn10072	atp_c + gbbtn_e + h2o_c --> adp_c + gbbtn_c + h_c + pi_c	3.6.3.32	7.6.2.9
PROLBabc	atp_c + h2o_c + prolb_e --> adp_c + h_c + pi_c + prolb_c	3.6.3.32	7.6.2.9
GLYabc	atp_c + gly_e + h2o_c --> adp_c + gly_c + h_c + pi_c	3.6.3.32	7.6.2.9

## Sheet: Table S3
Table S3. GPR modifications based on the GPRuler tool.
Classification	ID	Name	Reaction equation	GPR in model	Results of GPRuler	GPR_update	Reasons for modification	Evidence
Different (GPRuler correct)	MNLpts	Phosphoenolpyruvate-protein phosphotransferase of PTS system (EC 2.7.3.9);Phosphocarrier protein of PTS system(BSU13900)	mnl_e + pep_c --> mnl1p_c + pyr_c	BSU13900 and BSU13910 and BSU03981	['BSU13900 and BSU13910 and BSU03981 and BSU03982']	BSU13900 and BSU13910 and BSU03981 and BSU03982	BSU13900 is phosphocarrier protein HPr; BSU13910 is phosphoenolpyruvate-protein phosphotransferase (PTS system enzyme I); BSU03981 is PTS system mannitol-specific EIICB component; BSU03982 is mannitol-specific phosphotransferase enzyme IIA component.	https://www.genome.jp/brite/bsu00001+BSU13900+BSU13910+BSU03981+BSU03982
Different (GPRuler correct)	HXAND	Xanthine dehydrogenase iron-sulfur subunit (EC 1.17.1.4);Xanthine dehydrogenase, molybdenum binding subunit (EC 1.17.1.4)(BSU32480);Xanthine dehydrogenase, FAD binding subunit (EC 1.17.1.4)(BSU32490);Probable xanthine dehydrogenase subunit A (XDHase subunit A) (EC 1.17.1.4)(BSU32510);xanthine dehydrogenase molybdenum-binding subunit(BSU32500)	h2o_c + hxan_c + nad_c <=> h_c + nadh_c + xan_c	BSU32470 and BSU32480 and BSU32490 and BSU32510 and BSU32500	['BSU32510 and BSU32490 and BSU32480 and BSU32470']	BSU32470 and BSU32480 and BSU32490 and BSU32510	The enzyme is composed of four subunits: PucA (BSU32510), PucC (BSU32490), PucD (BSU32480), and PucE(BSU32470).	https://legacy.uniprot.org/uniprot/O32143;https://legacy.uniprot.org/uniprot/O32144;https://legacy.uniprot.org/uniprot/O32145;https://legacy.uniprot.org/uniprot/O32147;
Different (GPRuler correct)	XAND	Xanthine dehydrogenase iron-sulfur subunit (EC 1.17.1.4);Xanthine dehydrogenase, molybdenum binding subunit (EC 1.17.1.4)(BSU32480);Xanthine dehydrogenase, FAD binding subunit (EC 1.17.1.4)(BSU32490);Probable xanthine dehydrogenase subunit A (XDHase subunit A) (EC 1.17.1.4)(BSU32510);xanthine dehydrogenase molybdenum-binding subunit(BSU32500)	h2o_c + nad_c + xan_c <=> h_c + nadh_c + urate_c	BSU32470 and BSU32480 and BSU32490 and BSU32510 and BSU32500	['BSU32510 and BSU32490 and BSU32480 and BSU32470']	BSU32470 and BSU32480 and BSU32490 and BSU32510	The enzyme is composed of four subunits: PucA (BSU32510), PucC (BSU32490), PucD (BSU32480), and PucE(BSU32470).	https://legacy.uniprot.org/uniprot/O32143;https://legacy.uniprot.org/uniprot/O32144;https://legacy.uniprot.org/uniprot/O32145;https://legacy.uniprot.org/uniprot/O32147;
Different (GPRuler correct)	DRIBabc	Ribose ABC transport system, ATP-binding protein RbsA (TC 3.A.1.2.1);Ribose ABC transport system, high affinity permease RbsD (TC 3.A.1.2.1)(BSU35930);Ribose ABC transport system, permease protein RbsC (TC 3.A.1.2.1)(BSU35950);Ribose ABC transport system, periplasmic ribose-binding protein RbsB (TC 3.A.1.2.1)(BSU35960)	atp_c + drib_e + h2o_c --> adp_c + drib_c + h_c + pi_c	BSU35930 and BSU35940 and BSU35950 and BSU35960	['BSU35940 and BSU35960 and BSU35950']	BSU35940 and BSU35950 and BSU35960	The ABC transporter complex RbsABC involved in ribose import. RbsB (BSU35960) is a D-ribose-binding protein; RbsC (BSU35950) is a ribose transport system permease. RbsA (BSU35940) is a ribose import ATP-binding protein.	https://www.genome.jp/brite/bsu00001+BSU35940+BSU35950+BSU35960
Different (GPRuler correct)	ATPS4r	ATP synthase beta chain (EC 3.6.3.14);ATP synthase alpha chain (EC 3.6.3.14)(BSU36830);ATP synthase epsilon chain (EC 3.6.3.14)(BSU36800);ATP synthase gamma chain (EC 3.6.3.14)(BSU36820);ATP synthase delta chain (EC 3.6.3.14)(BSU36840);ATP synthase B chain (EC 3.6.3.14)(BSU36850);ATP synthase C chain (EC 3.6.3.14)(BSU36860);ATP synthase A chain (EC 3.6.3.14)(BSU36870);ATP synthase protein I(BSU36…	adp_c + 4.0 h_e + pi_c --> atp_c + h2o_c + 3.0 h_c	BSU36800 and BSU36810 and BSU36820 and BSU36830 and BSU36840 and BSU36850 and BSU36860 and BSU36870 and BSU36880	['BSU36830 and BSU36870 and BSU36800 and BSU36810 and BSU36860 and BSU36850 and BSU36820 and BSU36840']	BSU36800 and BSU36810 and BSU36820 and BSU36830 and BSU36840 and BSU36850 and BSU36860 and BSU36870	F-type ATPases have 2 components, CF1 - the catalytic core - and CF0 - the membrane proton channel. CF1 has five subunits: alpha3(BSU36830), beta3(BSU36810), gamma1(BSU36820), delta1(BSU36830), epsilon1(BSU36800). CF0 has three main subunits: a(BSU36870), b(BSU36850), and c (BSU36860).	https://legacy.uniprot.org/uniprot/P37812;https://legacy.uniprot.org/uniprot/P37809;https://legacy.uniprot.org/uniprot/P37810;https://legacy.uniprot.org/uniprot/P37808;https://legacy.uniprot.org/uniprot/P37811;https://legacy.uniprot.org/uniprot/P37814;https://legacy.uniprot.org/uniprot/P37815;https://legacy.uniprot.org/uniprot/P37813;
Different (GPRuler correct)	NTR3B	Respiratory nitrate reductase gamma chain (EC 1.7.99.4);Respiratory nitrate reductase beta chain (EC 1.7.99.4)(BSU37270);Respiratory nitrate reductase alpha chain (EC 1.7.99.4)(BSU37280);Respiratory nitrate reductase delta chain (EC 1.7.99.4)(BSU37260)	2.0 h_c + no3_c <=> C00828_c + h2o_c + 2.0 h_e + no2_c	BSU37250 and BSU37260 and BSU37270 and BSU37280	['BSU37280 and BSU37270 and BSU37250']	BSU37250 and BSU37280 and BSU37270	NarG (BSU37280) is a nitrate reductase alpha chain; NarH (BSU37270) is a nitrate reductase beta chain; NarI (BSU37250) is a nitrate reductase gamma chain.	https://www.genome.jp/brite/bsu00001+BSU37250+BSU37270+BSU37280
Different (Model correct)	CBPS	Carbamoyl-phosphate synthase small chain (EC 6.3.5.5);Carbamoyl-phosphate synthase large chain (EC 6.3.5.5)(BSU11240);Carbamoyl-phosphate synthase large chain (EC 6.3.5.5)(BSU15520)	2.0 atp_c + gln__L_c + h2o_c + hco3_c --> 2.0 adp_c + cbp_c + glu__L_c + h_c + pi_c	( BSU11230 and BSU11240 ) or ( BSU15510 and BSU15520 )	['BSU11230 and BSU11240 and BSU15510 and BSU15520']	( BSU11230 and BSU11240 ) or ( BSU15510 and BSU15520 )	Both ( BSU11230 and BSU11240 ) and ( BSU15510 and BSU15520 ) can catalyze this reaction. CarB (BSU11240) is a carbamoyl-phosphate synthase arginine-specific large chain, and CarA (BSU11230 ) is a carbamoyl-phosphate synthase arginine-specific small chain. CarB (BSU15520) is a carbamoyl-phosphate synthase pyrimidine-specific large chain, and PyrAA (BSU15510) is a carbamoyl-phosphate synthase pyrim…	https://www.genome.jp/brite/bsu00001+BSU11230+BSU11240+BSU15510+BSU15520
Different (Model correct)	R03050	Acetolactate synthase small subunit (EC 2.2.1.6);Acetolactate synthase large subunit (EC 2.2.1.6)(BSU28310);Acetolactate synthase, catabolic (EC 2.2.1.6)(BSU36010)	alac__S_c + thmpp_c <=> 2ahethmpp_c + pyr_c	( BSU28300 and BSU28310 ) or BSU36010	['BSU28310 and BSU28300']	( BSU28300 and BSU28310 ) or BSU36010	AlsS (BSU36010) is acetolactate synthase. IlvB (BSU28310) is an acetolactate synthase large subunit and IlvH (BSU28300) is an acetolactate synthase small subunit.	https://www.genome.jp/brite/bsu00001+BSU28300+BSU28310+BSU36010
Different (Model correct)	CHLabc	Choline ABC transport system, permease protein OpuBD;Choline ABC transport system, choline-binding protein OpuBC(BSU33710);Choline ABC transport system, permease protein OpuBB(BSU33720);Choline ABC transport system, ATP-binding protein OpuBA(BSU33730);Osmotically activated L-carnitine/choline ABC transporter, permease protein OpuCD(BSU33800);Osmotically activated L-carnitine/choline ABC transport…	atp_c + chol_e + h2o_c --> adp_c + chol_c + h_c + pi_c	( BSU33700 and BSU33710 and BSU33720 and BSU33730 ) or ( BSU33800 and BSU33810 and BSU33820 and BSU33830 )	['BSU33730', 'BSU33720 and BSU33700', 'BSU33710', 'BSU33830 and BSU33820 and BSU33810 and BSU33800']	( BSU33700 and BSU33710 and BSU33720 and BSU33730 ) or ( BSU33800 and BSU33810 and BSU33820 and BSU33830 )	OpuCC (BSU33810) is glycine betaine/carnitine/choline-binding protein; OpuCB (BSU33820) is glycine betaine/carnitine/choline transport system permease protein; OpuCD (BSU33800) is glycine betaine/carnitine/choline transport system permease protein; OpuCA (BSU33830) is glycine betaine/carnitine/choline transport ATP-binding protein; OpuBC (BSU33710) is choline-binding protein; OpuBD (BSU33700) is …	https://www.genome.jp/brite/bsu00001+BSU33700+BSU33710+BSU33720+BSU33730;https://www.genome.jp/brite/bsu00001+BSU33800+BSU33810+BSU33820+BSU33830;
Different (Model correct)	CHOLSabc	Choline ABC transport system, permease protein OpuBD;Choline ABC transport system, choline-binding protein OpuBC(BSU33710);Choline ABC transport system, permease protein OpuBB(BSU33720);Choline ABC transport system, ATP-binding protein OpuBA(BSU33730);Osmotically activated L-carnitine/choline ABC transporter, permease protein OpuCD(BSU33800);Osmotically activated L-carnitine/choline ABC transport…	atp_c + chols_e + h2o_c --> adp_c + chols_c + h_c + pi_c	( BSU33700 and BSU33710 and BSU33720 and BSU33730 ) or ( BSU33800 and BSU33810 and BSU33820 and BSU33830 )	['BSU33730', 'BSU33720 and BSU33700', 'BSU33710', 'BSU33830 and BSU33820 and BSU33810 and BSU33800']	( BSU33700 and BSU33710 and BSU33720 and BSU33730 ) or ( BSU33800 and BSU33810 and BSU33820 and BSU33830 )	OpuCC (BSU33810) is glycine betaine/carnitine/choline-binding protein; OpuCB (BSU33820) is glycine betaine/carnitine/choline transport system permease protein; OpuCD (BSU33800) is glycine betaine/carnitine/choline transport system permease protein; OpuCA (BSU33830) is glycine betaine/carnitine/choline transport ATP-binding protein; OpuBC (BSU33710) is choline-binding protein; OpuBD (BSU33700) is …	https://www.genome.jp/brite/bsu00001+BSU33700+BSU33710+BSU33720+BSU33730;https://www.genome.jp/brite/bsu00001+BSU33800+BSU33810+BSU33820+BSU33830;
Different (Model correct)	ADCS	Para-aminobenzoate synthase, aminase component (EC 2.6.1.85);Anthranilate synthase, amidotransferase component (EC 4.1.3.27)|Para-aminobenzoate synthase, amidotransferase component (EC 2.6.1.85)(BSU00750)	chor_c + gln__L_c <=> 4adcho_c + glu__L_c	BSU00740 and BSU00750	['BSU00750', 'BSU00740']	BSU00740 and BSU00750	Heterodimer consists of two non-identical subunits: a glutamine amidotransferase subunit (PabA-BSU00740) and an aminodeoxychorismate synthase subunit (PabB-BSU00750).	https://legacy.uniprot.org/uniprot/P28820;https://legacy.uniprot.org/uniprot/P28819;
Different (Model correct)	ANS	Anthranilate synthase, aminase component (EC 4.1.3.27);Anthranilate synthase, amidotransferase component (EC 4.1.3.27)|Para-aminobenzoate synthase, amidotransferase component (EC 2.6.1.85)(BSU00750)	chor_c + gln__L_c --> anth_c + glu__L_c + h_c + pyr_c	BSU00750 and BSU22680	['BSU00750', 'BSU22680']	BSU00750 and BSU22680	TrpE(BSU22680) is anthranilate synthase component 1 and PabB(BSU00750) is anthranilate synthase component 2.	https://legacy.uniprot.org/uniprot/P28819;https://legacy.uniprot.org/uniprot/P03963;
Different (Model correct)	NA1ATPasem	catalyses ATP-dependent electrogenic Na+ extrusion without mechanistically coupled H+ or K+ uptake	atp_c + h2o_c + na1_c --> adp_c + h_c + na1_e + pi_c	BSU02750 and BSU02760	['BSU27440 and BSU02750 and BSU02760 and BSU30450 and BSU30420 and BSU39640 and BSU39630']	BSU02750 and BSU02760	The complex is composed of NatA(BSU02750) and NatB(BSU02760).	https://legacy.uniprot.org/uniprot/P46903;https://legacy.uniprot.org/uniprot/P46904;
Different (Model correct)	FUMt2r	TRAP-type C4-dicarboxylate transport system, periplasmic component;C4-dicarboxylate transport protein(BSU04470)	fum_e + h_e <=> fum_c + h_c	BSU04440 and BSU04470	['BSU04440']	BSU04440 and BSU04470	BSU04440 and BSU04470 are responsible for the growth of fumarate and succinate.	https://legacy.uniprot.org/uniprot/P96600;https://legacy.uniprot.org/uniprot/P96603;
Different (Model correct)	SUCCt2r	TRAP-type C4-dicarboxylate transport system, periplasmic component;C4-dicarboxylate transport protein(BSU04470)	h_e + succ_e <=> h_c + succ_c	BSU04440 and BSU04470	['BSU04440']	BSU04440 and BSU04470	BSU04440 and BSU04470 are responsible for the growth of fumarate and succinate.	https://legacy.uniprot.org/uniprot/P96600;https://legacy.uniprot.org/uniprot/P96603;
Different (Model correct)	GLNTRAT	Aspartyl-tRNA(Asn) amidotransferase subunit C (EC 6.3.5.-)|Glutamyl-tRNA(Gln) amidotransferase subunit C (EC 6.3.5.-);Aspartyl-tRNA(Asn) amidotransferase subunit A (EC 6.3.5.-)|Glutamyl-tRNA(Gln) amidotransferase subunit A (EC 6.3.5.-)(BSU06680);Aspartyl-tRNA(Asn) amidotransferase subunit B (EC 6.3.5.-)|Glutamyl-tRNA(Gln) amidotransferase subunit B (EC 6.3.5.-)(BSU06690)	atp_c + gln__L_c + glutrnaln_c + h2o_c --> adp_c + glntrna_c + glu__L_c + pi_c	BSU06670 and BSU06680 and BSU06690	['BSU06680 and BSU06670', 'BSU06690']	BSU06670 and BSU06680 and BSU06690	Heterotrimer of A, B, and C subunits; BSU06670 is Glutamyl-tRNA(Gln) amidotransferase subunit C; BSU06680 is Glutamyl-tRNA(Gln) amidotransferase subunit A; BSU06670 is Aspartyl/glutamyl-tRNA(Asn/Gln) amidotransferase subunit B.	https://legacy.uniprot.org/uniprot/O06492;https://legacy.uniprot.org/uniprot/O06491;https://legacy.uniprot.org/uniprot/O30509;
Different (Model correct)	ASNTRAT	Aspartyl-tRNA(Asn) amidotransferase subunit C (EC 6.3.5.-)|Glutamyl-tRNA(Gln) amidotransferase subunit C (EC 6.3.5.-);Aspartyl-tRNA(Asn) amidotransferase subunit A (EC 6.3.5.-)|Glutamyl-tRNA(Gln) amidotransferase subunit A (EC 6.3.5.-)(BSU06680);Aspartyl-tRNA(Asn) amidotransferase subunit B (EC 6.3.5.-)|Glutamyl-tRNA(Gln) amidotransferase subunit B (EC 6.3.5.-)(BSU06690)	asptrna_asn_c + atp_c + gln__L_c + h2o_c --> adp_c + asntrna_c + glu__L_c + pi_c	BSU06670 and BSU06680 and BSU06690	['BSU06680 and BSU06670', 'BSU06690']	BSU06670 and BSU06680 and BSU06690	Heterotrimer of A, B, and C subunits; BSU06670 is Glutamyl-tRNA(Gln) amidotransferase subunit C; BSU06680 is Glutamyl-tRNA(Gln) amidotransferase subunit A; BSU06670 is Aspartyl/glutamyl-tRNA(Asn/Gln) amidotransferase subunit B.	https://legacy.uniprot.org/uniprot/O06492;https://legacy.uniprot.org/uniprot/O06491;https://legacy.uniprot.org/uniprot/O30509;
Different (Model correct)	rxn09953	Dihydrolipoamide dehydrogenase of acetoin dehydrogenase (EC 1.8.1.4);Acetoin dehydrogenase E1 component alpha-subunit (EC 1.2.4.-)(BSU08060);Acetoin dehydrogenase E1 component beta-subunit (EC 1.2.4.-)(BSU08070);Dihydrolipoamide acetyltransferase component (E2) of acetoin dehydrogenase complex (EC 2.3.1.-)(BSU08080)	actn__R_c + coa_c + nad_c --> acald_c + accoa_c + h_c + nadh_c	BSU08060 and BSU08070 and BSU08080 and BSU08090	['BSU08080 and BSU14600', 'BSU08060 and BSU08070', 'BSU08090 and BSU24060 and BSU14610']	BSU08060 and BSU08070 and BSU08080 and BSU08090	acoA(BSU08060) is acetoin dehydrogenase E1 subunit alpha;acoB(BSU08070) is acetoin dehydrogenase E1 subunit beta;acoC(BSU08080) is acetoin dehydrogenase E2 component; acoD(08090) is E3 component of acetoin cleaving system	https://legacy.uniprot.org/uniprot/O31404;https://legacy.uniprot.org/uniprot/O34591;https://legacy.uniprot.org/uniprot/O31550; https://legacy.uniprot.org/uniprot/O34324
Different (Model correct)	GLUSy	Glutamate synthase [NADPH] small chain (EC 1.4.1.13);Glutamate synthase [NADPH] large chain (EC 1.4.1.13)(BSU18450)	akg_c + gln__L_c + h_c + nadph_c --> 2.0 glu__L_c + nadp_c	BSU18440 and BSU18450	['BSU18450 and BSU18440 and BSU06590']	BSU18440 and BSU18450	BSU18440 is glutamate synthase [NADPH] small chain and BSU18450 is glutamate synthase [NADPH] large chain.	https://legacy.uniprot.org/uniprot/O34399;https://legacy.uniprot.org/uniprot/P39812;
Different (Model correct)	ATNS_nh4	Anthranilate synthase, aminase component (EC 4.1.3.27);Anthranilate synthase, amidotransferase component (EC 4.1.3.27)|Para-aminobenzoate synthase, amidotransferase component (EC 2.6.1.85)(BSU00750)	chor_c + nh4_c --> anth_c + h2o_c + h_c + pyr_c	BSU22680 and BSU00750	['BSU00750', 'BSU22680']	BSU00750 and BSU22680	TrpE(BSU22680) is anthranilate synthase component 1 and PabB(BSU00750) is anthranilate synthase component 2.	https://legacy.uniprot.org/uniprot/P28819;https://legacy.uniprot.org/uniprot/P03963;
Different (Model correct)	PIabc	Phosphate transport ATP-binding protein PstB (TC 3.A.1.7.1);Putative periplasmic phosphate-binding protein PstS, Mycoplasma type(BSU24970);Phosphate transport system permease protein pstC (TC 3.A.1.7.1)(BSU24980);Phosphate ABC transporter, periplasmic phosphate-binding protein PstS (TC 3.A.1.7.1)(BSU24990)	atp_c + h2o_c + pi_e --> adp_c + h_c + 2.0 pi_c	BSU24950 and BSU24960 and BSU24970 and BSU24980 and BSU24990	['BSU24950 and BSU24960', 'BSU03380 and BSU06980 and BSU06990 and BSU24980 and BSU24970 and BSU32580 and BSU32590', 'BSU24990']	BSU24950 and BSU24960 and BSU24970 and BSU24980 and BSU24990	The complex is composed of two ATP-binding proteins (PstB1-BSU24950;PstB2-BSU24960), two transmembrane proteins (PstC-BSU24980 and PstA-BSU24970), and a solute-binding protein (PstS-BSU24990).	https://legacy.uniprot.org/uniprot/P46342;https://legacy.uniprot.org/uniprot/P46341;https://legacy.uniprot.org/uniprot/P46340;https://legacy.uniprot.org/uniprot/P46339;https://legacy.uniprot.org/uniprot/P46338;
Different (Model correct)	GLNabc	Glutamine transport ATP-binding protein glnQ (TC 3.A.1.3.2);Glutamine ABC transporter, periplasmic glutamine-binding protein (TC 3.A.1.3.2)(BSU27440);Glutamine transport system permease protein glnP (TC 3.A.1.3.2)(BSU27450);Glutamine transport system permease protein glnP (TC 3.A.1.3.2)(BSU27460)	atp_c + gln__L_e + h2o_c --> adp_c + gln__L_c + h_c + pi_c	BSU27430 and BSU27440 and BSU27450 and BSU27460	['BSU27440 and BSU02750 and BSU02760 and BSU30450 and BSU30420 and BSU39640 and BSU39630', 'BSU27450 and BSU27460', 'BSU27430']	BSU27430 and BSU27440 and BSU27450 and BSU27460	BSU27430(GlnQ) and BSU27440(GlnH) and BSU27450(GlnM) and BSU27460(GlnP) form the ABC transporter complex GlnHMPQ is involved in glutamine transport.	https://legacy.uniprot.org/uniprot/O34677;https://legacy.uniprot.org/uniprot/O34563;https://legacy.uniprot.org/uniprot/O34671;https://legacy.uniprot.org/uniprot/O34606;
Different (Model correct)	GLYCTO1	Glycolate dehydrogenase (EC 1.1.99.14), subunit GlcD;Similar to glycolate dehydrogenase iron-sulfur subunit GlcF(BSU28690)	glyclt_c + o2_c --> glx_c + h2o2_c	BSU28680 and BSU28690	['BSU28680', 'BSU28690']	BSU28680 and BSU28690	The glycolate oxidase likely consists of several subunits including GlcD(BSU28680) and GlcF(BSU28690).	https://legacy.uniprot.org/uniprot/P94535;https://legacy.uniprot.org/uniprot/P94534;
Different (Model correct)	MNabc	Manganese ABC transporter, inner membrane permease protein SitD;Manganese ABC transporter, inner membrane permease protein SitC(BSU30750);Manganese ABC transporter, ATP-binding protein SitB(BSU30760);Manganese ABC transporter, periplasmic-binding protein SitA(BSU30770)	atp_c + h2o_c + mn2_e --> adp_c + h_c + mn2_c + pi_c	BSU30740 and BSU30750 and BSU30760 and BSU30770	['BSU30760']	BSU30740 and BSU30750 and BSU30760 and BSU30770	BSU30740(MntD) and BSU30750(MntC) and BSU30760(MntB) and BSU30770(MntA) form the ABC transporter complex MntABCD which involved in manganese import.	https://legacy.uniprot.org/uniprot/O34500;https://legacy.uniprot.org/uniprot/O35024;https://legacy.uniprot.org/uniprot/O34338;https://legacy.uniprot.org/uniprot/O34385;
Different (Model correct)	rxn05187	Adenosylcobinamide amidohydrolase (EC 3.5.1.90)|Vitamin B12 ABC transporter, ATPase component BtuD;Vitamin B12 ABC transporter, permease component BtuC(BSU33170);Vitamin B12 ABC transporter, B12-binding component BtuF(BSU33180)	atp_c + b12_e + h2o_c --> adp_c + b12_c + h_c + pi_c	BSU33160 and BSU33170 and BSU33180	['BSU33160 and BSU33170 and BSU33270']	BSU33160 and BSU33170 and BSU33180	The complex is composed of two ATP-binding proteins (YvrA-BSU33160), two transmembrane proteins (YvrB-BSU33170), and a solute-binding protein (YvrC-BSU33180).	https://legacy.uniprot.org/uniprot/O34631;https://legacy.uniprot.org/uniprot/O34451;https://legacy.uniprot.org/uniprot/O34805;
Different (Model correct)	CBL2abc	Adenosylcobinamide amidohydrolase (EC 3.5.1.90)|Vitamin B12 ABC transporter, ATPase component BtuD;Vitamin B12 ABC transporter, permease component BtuC(BSU33170);Vitamin B12 ABC transporter, B12-binding component BtuF(BSU33180)	atp_c + cbl2_e + h2o_c --> adp_c + cbl2_c + h_c + pi_c	BSU33160 and BSU33170 and BSU33180	['BSU33160 and BSU33170 and BSU33270']	BSU33160 and BSU33170 and BSU33180	The complex is composed of two ATP-binding proteins (YvrA-BSU33160), two transmembrane proteins (YvrB-BSU33170), and a solute-binding protein (YvrC-BSU33180).	https://legacy.uniprot.org/uniprot/O34631;https://legacy.uniprot.org/uniprot/O34451;https://legacy.uniprot.org/uniprot/O34805;
Different (Model correct)	FERRICHabc	Ferrichrome transport ATP-binding protein FhuC (TC 3.A.1.14.3);Ferrichrome transport system permease protein fhuG(BSU33300);Ferrichrome transport system permease protein fhuB (TC 3.A.1.14.3)(BSU33310);Ferrichrome-binding periplasmic protein precursor (TC 3.A.1.14.3)(BSU33320)	atp_c + fecrm_e + h2o_c --> adp_c + fecrm_c + h_c + pi_c	BSU33290 and BSU33300 and BSU33310 and BSU33320	['BSU33310 and BSU33290 and BSU33320 and BSU33300 and BSU39610']	BSU33290 and BSU33300 and BSU33310 and BSU33320	BSU33290(FhuC) and BSU33300(FhuG) and BSU33310(FhuB) and BSU33320(FhuD) form the ABC transporter complex FhuBGCD which involved in iron3+-hydroxamate import.	https://legacy.uniprot.org/uniprot/P49938;https://legacy.uniprot.org/uniprot/P49937;https://legacy.uniprot.org/uniprot/P49936;https://legacy.uniprot.org/uniprot/P37580;
Different (Model correct)	FERXAabc	Ferrichrome transport ATP-binding protein FhuC (TC 3.A.1.14.3);Ferrichrome transport system permease protein fhuG(BSU33300);Ferrichrome transport system permease protein fhuB (TC 3.A.1.14.3)(BSU33310);Ferrichrome-binding periplasmic protein precursor (TC 3.A.1.14.3)(BSU33320)	atp_c + feoxam_e + h2o_c --> adp_c + feoxam_c + h_c + pi_c	BSU33290 and BSU33300 and BSU33310 and BSU33320	['BSU33310 and BSU33290 and BSU33320 and BSU33300 and BSU39610']	BSU33290 and BSU33300 and BSU33310 and BSU33320	BSU33290(FhuC) and BSU33300(FhuG) and BSU33310(FhuB) and BSU33320(FhuD) form the ABC transporter complex FhuBGCD which involved in iron3+-hydroxamate import.	https://legacy.uniprot.org/uniprot/P49938;https://legacy.uniprot.org/uniprot/P49937;https://legacy.uniprot.org/uniprot/P49936;https://legacy.uniprot.org/uniprot/P37580;
Different (Model correct)	MOBDabc	Predicted molybdate-responsive regulator YvgK in bacilli;Molybdenum ABC transporter, periplasmic molybdenum-binding protein modA (TC 3.A.1.8.1)(BSU33380);Molybdenum transport system permease protein modB (TC 3.A.1.8.1)(BSU33390)	atp_c + h2o_c + mobd_e --> adp_c + h_c + mobd_c + pi_c	BSU33370 and BSU33380 and BSU33390	['BSU33390']	BSU33370 and BSU33380 and BSU33390	YvgM(BSU33390 ) is molybdenum transport system permease protein;YvgL(BSU33380) is ABC transporter substrate-binding protein;YvgK(BSU33370) function as DNA binding	https://www.genome.jp/brite/bsu00001+BSU33370+BSU33380+BSU33390
Different (Model correct)	ATPPRT	ATP phosphoribosyltransferase catalytic subunit (EC 2.4.2.17);ATP phosphoribosyltransferase regulatory subunit (EC 2.4.2.17)(BSU34930)	atp_c + prpp_c --> ppi_c + prbatp_c	BSU34920 and BSU34930	['BSU34930']	BSU34920 and BSU34930	Heteromultimer composed of HisG (BSU34920) and HisZ (BSU34930) subunits.	https://legacy.uniprot.org/uniprot/O34520;https://legacy.uniprot.org/uniprot/O34459;
Different (Model correct)	rxn10191	D-alanine--poly(phosphoribitol) ligase subunit 1 (EC 6.1.1.13);D-alanine--poly(phosphoribitol) ligase subunit 2 (EC 6.1.1.13)(BSU38520);D-alanyl transfer protein DltB(BSU38510);Poly(glycerophosphate chain) D-alanine transfer protein DltD(BSU38530)	45.0 ala__D_c + 45.0 atp_c + prenoN_acid_c --> 45.0 amp_c + cpd15663_c + 45.0 ppi_c	BSU38500 and BSU38510 and BSU38520 and BSU38530	['BSU38500']	BSU38500 and BSU38510 and BSU38520 and BSU38530	DltA (BSU38500) catalyzes the first step in the D-alanylation of lipoteichoic acid (LTA), the activation of D-alanine and its transfer onto the D-alanyl carrier protein (Dcp); DltC (BSU38520) and DltB (BSU38510) consists of a ring of transmembrane domains, which shield a highly conserved extracellular structural funnel extending into the middle of the lipid bilayer. The conserved catalytic His re…	https://legacy.uniprot.org/uniprot/P39581;https://legacy.uniprot.org/uniprot/P39580;https://legacy.uniprot.org/uniprot/P39579;https://legacy.uniprot.org/uniprot/P39578;
Different (Model correct)	CYSabc	amino acid ABC transporter, ATP-binding protein;amino acid ABC transporter, permease protein(BSU39490);Cysteine ABC transporter, substrate-binding protein(BSU39500)	atp_c + cys__L_e + h2o_c --> adp_c + cys__L_c + h_c + pi_c	BSU39480 and BSU39490 and BSU39500	['BSU03370 and BSU39500 and BSU39490 and BSU39480']	BSU39480 and BSU39490 and BSU39500	Probably part of the ABC transporter complex YxeMNO that could be involved in amino-acid import.	https://legacy.uniprot.org/uniprot/P54954;https://legacy.uniprot.org/uniprot/P54953;https://legacy.uniprot.org/uniprot/P54952;
Different (Model correct)	rxn05304	amino acid ABC transporter, ATP-binding protein;amino acid ABC transporter, permease protein(BSU39490);Cysteine ABC transporter, substrate-binding protein(BSU39500)	atp_c + cysi__L_e + h2o_c --> adp_c + cysi__L_c + h_c + pi_c	BSU39480 and BSU39490 and BSU39500	['BSU03370 and BSU39500 and BSU39490 and BSU39480']	BSU39480 and BSU39490 and BSU39500	Probably part of the ABC transporter complex YxeMNO that could be involved in amino-acid import.	https://legacy.uniprot.org/uniprot/P54954;https://legacy.uniprot.org/uniprot/P54953;https://legacy.uniprot.org/uniprot/P54952;
Different (Neither is correct)	FE2abc	Iron compound ABC uptake transporter ATP-binding protein;component of iron-uptake system(BSU01610);component of iron-uptake system(BSU01620);component of iron-uptake system(BSU01630);Iron compound ABC uptake transporter permease protein(BSU03800);Iron compound ABC uptake transporter permease protein(BSU03810);Iron compound ABC uptake transporter substrate-binding protein(BSU03830)	atp_c + fe2_e + h2o_c --> adp_c + fe2_c + h_c + pi_c	( BSU01610 and BSU01620 and BSU01630 ) or ( BSU03800 and BSU03810 and BSU03820 and BSU03830 )	['BSU03830', 'BSU01630 and BSU01620 and BSU01610', 'BSU03800 and BSU03810 and BSU03820']	BSU38260 and BSUBSU38270 and BSU38280	EfeU(BSU38280) is responsible for uptake of Fe2+ ions across the membrane,and EfeU, EfeM(BSU38270) and EfeN(BSU38260) form the ferrous iron transporter	https://www.uniprot.org/uniprotkb/P39597; https://www.uniprot.org/uniprotkb/P39596; https://www.uniprot.org/uniprotkb/P39595; https://www.uniprot.org/uniprotkb/P75901
Different (Neither is correct)	ZNabc	Copper-translocating P-type ATPase (EC 3.6.3.4)|Lead, cadmium, zinc and mercury transporting ATPase (EC 3.6.3.3) (EC 3.6.3.5);Zinc ABC transporter, ATP-binding protein ZnuC(BSU02860);Zinc ABC transporter, periplasmic-binding protein ZnuA(BSU02850);Zinc ABC transporter, inner membrane permease protein ZnuB(BSU02870)	atp_c + h2o_c + zn2_e --> adp_c + h_c + pi_c + zn2_c	( BSU02850 and BSU02860 and BSU02870 ) or BSU33490 or BSU13850	['BSU02860']	( BSU02850 and BSU02860 and BSU02870 ) or BSU13850	The complex is composed of two ATP-binding proteins (ZnuC, BSU002850), two transmembrane proteins (ZnuB, BSU02860), and a solute-binding protein (ZnuA, BSU02870). Zinc-transporting ATPase(BSU13850) have the same activity	https://legacy.uniprot.org/uniprot/O34966;https://legacy.uniprot.org/uniprot/O34946;https://legacy.uniprot.org/uniprot/O34610;https://legacy.uniprot.org/uniprot/O31688;
Different (Neither is correct)	FE3abc	Iron compound ABC uptake transporter ATP-binding protein;component of iron-uptake system(BSU01610);component of iron-uptake system(BSU01620);component of iron-uptake system(BSU01630);Iron compound ABC uptake transporter permease protein(BSU03800);Iron compound ABC uptake transporter permease protein(BSU03810);Iron compound ABC uptake transporter substrate-binding protein(BSU03830)	atp_c + fe3_e + h2o_c --> adp_c + fe3_c + h_c + pi_c	( BSU03800 and BSU03810 and BSU03820 and BSU03830 ) or ( BSU01610 and BSU01620 and BSU01630 )	['BSU03830', 'BSU01630 and BSU01620 and BSU01610', 'BSU03800 and BSU03810 and BSU03820']	BSU01610 and BSU01620 and BSU01630	FeuC(BSU01620) is Iron-uptake system permease protein; FeuB (BSU01610) is Iron-uptake system permease protein FeuB; FeuC(BSU01620) Iron-uptake system-binding protein, and they form the ABC transporter complex FeuABC.	https://legacy.uniprot.org/uniprot/P40411; https://legacy.uniprot.org/uniprot/P40410;https://legacy.uniprot.org/uniprot/P40409;https://legacy.uniprot.org/uniprot/O32188;
Different (Neither is correct)	MALTabc	Predicted rhamnose oligosaccharide ABC transport system, substrate-binding component;Predicted rhamnose oligosaccharide ABC transport system, permease component 2(BSU06980);Predicted rhamnose oligosaccharide ABC transport system, permease component(BSU06990);ABC-type polysaccharide transport system, permease component(BSU07110)	atp_c + h2o_c + malt_e --> adp_c + h_c + malt_c + pi_c	( BSU06970 and BSU06980 and BSU06990 ) or BSU07110	['BSU03380 and BSU06980 and BSU06990 and BSU24980 and BSU24970 and BSU32580 and BSU32590', 'BSU37390 and BSU06970 and BSU12250']	BSU38810 and BSU34590 and BSU34600 and BSU34610	MdxEFG-MsmX ABC transporter complex involved in maltodextrin import. MsmX (BSU38810) is a maltodextrin import ATP-binding protein; MdxE (BSU34610) is a maltodextrin-binding protein; MdxF (BSU34600) is a maltodextrin transport system permease protein; MdxG (BSU34590) is a maltodextrin transport system permease protein.	https://www.genome.jp/brite/bsu00001+BSU38810+BSU34590+BSU34600+BSU34610
Different (Neither is correct)	LCTSabc	Predicted rhamnose oligosaccharide ABC transport system, substrate-binding component;Predicted rhamnose oligosaccharide ABC transport system, permease component 2(BSU06980);Predicted rhamnose oligosaccharide ABC transport system, permease component(BSU06990);ABC-type polysaccharide transport system, permease component(BSU07110)	atp_c + h2o_c + lcts_e --> adp_c + h_c + lcts_c + pi_c	( BSU06970 and BSU06980 and BSU06990 ) or BSU07110	['BSU03380 and BSU06980 and BSU06990 and BSU24980 and BSU24970 and BSU32580 and BSU32590', 'BSU37390 and BSU06970 and BSU12250']	delete reaction	In UniProt and KEGG, we can not find any gene which is responsible for lactose ABC transport in Bacillus subtilis (strain 168).
Different (Neither is correct)	RMNt	Predicted rhamnose oligosaccharide ABC transport system, substrate-binding component;Predicted rhamnose oligosaccharide ABC transport system, permease component 2(BSU06980);Predicted rhamnose oligosaccharide ABC transport system, permease component(BSU06990);ABC-type polysaccharide transport system, permease component(BSU07110)	h_e + rmn_e <=> h_c + rmn_c	( BSU06970 and BSU06980 and BSU06990 ) or BSU07110	['BSU03380 and BSU06980 and BSU06990 and BSU24980 and BSU24970 and BSU32580 and BSU32590', 'BSU37390 and BSU06970 and BSU12250']	BSU20080	b3907 is responsible for the L-rhamnose-proton symporter in Escherichia coli (strain K12). We found BSU20080 has a 36.8% similarity with b3907.	https://legacy.uniprot.org/uniprot/O31877;
Different (Neither is correct)	FEDCabc	Iron(III) dicitrate transport ATP-binding protein FecE (TC 3.A.1.14.1);Iron(III) dicitrate transport system, periplasmic iron-binding protein FecB (TC 3.A.1.14.1)(BSU08440);Iron(III) dicitrate transport system permease protein fecD (TC 3.A.1.14.1)(BSU08450);Iron(III) dicitrate transport system permease protein fecD (TC 3.A.1.14.1)(BSU08460)	atp_c + 2.0 cit_e + fe3_e + h2o_c --> adp_c + 2.0 cit_c + fe3_c + h_c + pi_c	( BSU08440 and BSU08450 and BSU08460 ) or BSU32940	['BSU08460 and BSU08450 and BSU32940']	BSU07490 and BSU07500 and BSU07510 and BSU07520	The ABC transporter complex YfmCDEF is involved in citrate-dependent Fe3+ import. YfmC (BSU07520) is a Fe(3+)-citrate-binding protein; YfmE(BSU07500) is a Fe(3+)-citrate import system permease protein; YfmD (BSU07510) is a Fe(3+)-citrate import system permease protein; YfmF (BSU07490) is a Fe(3+)-citrate import ATP-binding protein.	https://legacy.uniprot.org/uniprot/O34510;https://legacy.uniprot.org/uniprot/O34832;https://legacy.uniprot.org/uniprot/O34933;https://legacy.uniprot.org/uniprot/O34348;
Different (Neither is correct)	GLCpts	PTS system, glucose-specific IIBC component (EC 2.7.1.69);PTS system, maltose and glucose-specific IIB component (EC 2.7.1.69)|PTS system, maltose and glucose-specific IIC component (EC 2.7.1.69)(BSU08200);Phosphoenolpyruvate-protein phosphotransferase of PTS system (EC 2.7.3.9)(BSU13910);PTS system, glucose-specific IIA component (EC 2.7.1.69)|PTS system, glucose-specific IIB component (EC 2.7.1…	glc__D_e + pep_c --> g6p_A_c + pyr_c	( BSU13890 and BSU13900 and BSU13910 ) or ( BSU08200 and BSU13900 and BSU13910 ) or ( BSU01680 and BSU13900 and BSU13910 ) or ( BSU40120 and BSU13900 and BSU13910 ) or ( BSU22230 and BSU13900 and BSU13910 )	['BSU13900 and BSU13910 and BSU08200', 'BSU13900 and BSU13910 and BSU13890', 'BSU13900 and BSU13910 and BSU01680', 'BSU22230 and BSU40120']	BSU13890 and BSU13900 and BSU13910	PtsG (BSU13890) is a PTS system-glucose-specific transporter subunit EIICBA; PtsI (BSU13910) is a phosphoenolpyruvate-protein phosphotransferase; PtsH (BSU13900) is a phosphocarrier protein HPr.	https://www.genome.jp/brite/bsu00001+BSU13890+BSU13900+BSU13910
Different (Neither is correct)	FRUptspp	PTS system, fructose-specific IIB component (EC 2.7.1.69);PTS system, fructose-specific IIA component (EC 2.7.1.69)|PTS system, fructose-specific IIB component (EC 2.7.1.69)|PTS system, fructose-specific IIC component (EC 2.7.1.69)(BSU14400);PTS system, fructose-specific IIA component (EC 2.7.1.69)(BSU27070);Phosphocarrier protein of PTS system(BSU13900);PTS system, fructose-specific IID componen…	fru_e + pep_c --> f1p_c + pyr_c	( BSU13900 and BSU14400 and BSU27040 ) or ( BSU13900 and BSU27040 and BSU27050 and BSU27060 and BSU27070 )	['BSU13900 and BSU13910 and BSU27070 and BSU27060 and BSU27050 and BSU27040', 'BSU13900 and BSU13910 and BSU14400']	BSU13900 and BSU13910 and BSU14400 and BSU12010	We found that b2167 and b2169 are PTS system fructose-specific EII component in iML1515, which are similarities to BSU12010(b2167-30.3%),BSU14400(b2169-44.6%).BSU12010 is PTS system mannose-specific EIIBCA component;BSU14400 is PTS system fructose-specific EIIABC component; PtsI (BSU13910) is a phosphoenolpyruvate-protein phosphotransferase; PtsI (BSU13910) is a phosphoenolpyruvate-protein phosph…	https://www.uniprot.org/uniprotkb/O31645/entry; https://www.uniprot.org/uniprotkb/P71012/entry;https://www.uniprot.org/uniprotkb/P08877/entry;https://www.uniprot.org/uniprotkb/P08838/entry
Different (Neither is correct)	RNDR1	Ribonucleotide reductase of class Ib (aerobic), alpha subunit (EC 1.17.4.1);Ribonucleotide reductase of class Ib (aerobic), beta subunit (EC 1.17.4.1)(BSU17390);SPBc2 prophage-derived ribonucleoside-diphosphate reductase subunit beta (EC 1.17.4.1) (Ribonucleotide reductase small subunit)(BSU20040);Ribonucleoside-diphosphate reductase nrdEB subunit alpha (EC 1.17.4.1) (Ribonucleotide reductase lar…	adp_c + trdrd_c --> dadp_c + h2o_c + trdox_c	( BSU17380 and BSU17390 and BSU17370 ) or ( BSU17380 and BSU17390 and BSU20040 and BSU20060 and BSU17370 )	['BSU17380 and BSU20060 and BSU17390', 'BSU20040']	( BSU17380 and BSU17390 ) or ( BSU20040 and BSU20060 )	NrdE (BSU17380/BSU20060) is a ribonucleoside-diphosphate reductase subunit alpha; NrdF (BSU17390/BSU20040) is a ribonucleoside-diphosphate reductase subunit beta.	https://www.genome.jp/brite/bsu00001+BSU17380+BSU17390+BSU20040+BSU20060
Different (Neither is correct)	RNDR4	Ribonucleotide reductase of class Ib (aerobic), alpha subunit (EC 1.17.4.1);Ribonucleotide reductase of class Ib (aerobic), beta subunit (EC 1.17.4.1)(BSU17390);SPBc2 prophage-derived ribonucleoside-diphosphate reductase subunit beta (EC 1.17.4.1) (Ribonucleotide reductase small subunit)(BSU20040);Ribonucleoside-diphosphate reductase nrdEB subunit alpha (EC 1.17.4.1) (Ribonucleotide reductase lar…	trdrd_c + udp_c --> dudp_c + h2o_c + trdox_c	( BSU17380 and BSU17390 and BSU17370 ) or ( BSU17380 and BSU17390 and BSU20040 and BSU20060 and BSU17370 )	['BSU17380 and BSU20060 and BSU17390', 'BSU20040']	( BSU17380 and BSU17390 ) or ( BSU20040 and BSU20060 )	NrdE (BSU17380/BSU20060) is a ribonucleoside-diphosphate reductase subunit alpha; NrdF (BSU17390/BSU20040) is a ribonucleoside-diphosphate reductase subunit beta.	https://www.genome.jp/brite/bsu00001+BSU17380+BSU17390+BSU20040+BSU20060
Different (Neither is correct)	RNDR2	Ribonucleotide reductase of class Ib (aerobic), alpha subunit (EC 1.17.4.1);Ribonucleotide reductase of class Ib (aerobic), beta subunit (EC 1.17.4.1)(BSU17390);SPBc2 prophage-derived ribonucleoside-diphosphate reductase subunit beta (EC 1.17.4.1) (Ribonucleotide reductase small subunit)(BSU20040);Ribonucleoside-diphosphate reductase nrdEB subunit alpha (EC 1.17.4.1) (Ribonucleotide reductase lar…	gdp_c + trdrd_c --> dgdp_c + h2o_c + trdox_c	( BSU17380 and BSU17390 and BSU17370 ) or ( BSU17380 and BSU17390 and BSU20040 and BSU20060 and BSU17370 )	['BSU17380 and BSU20060 and BSU17390', 'BSU20040']	( BSU17380 and BSU17390 ) or ( BSU20040 and BSU20060 )	NrdE (BSU17380/BSU20060) is a ribonucleoside-diphosphate reductase subunit alpha; NrdF (BSU17390/BSU20040) is a ribonucleoside-diphosphate reductase subunit beta.	https://www.genome.jp/brite/bsu00001+BSU17380+BSU17390+BSU20040+BSU20060
Different (Neither is correct)	RNDR3	Ribonucleotide reductase of class Ib (aerobic), alpha subunit (EC 1.17.4.1);Ribonucleotide reductase of class Ib (aerobic), beta subunit (EC 1.17.4.1)(BSU17390);SPBc2 prophage-derived ribonucleoside-diphosphate reductase subunit beta (EC 1.17.4.1) (Ribonucleotide reductase small subunit)(BSU20040);Ribonucleoside-diphosphate reductase nrdEB subunit alpha (EC 1.17.4.1) (Ribonucleotide reductase lar…	cdp_c + trdrd_c --> dcdp_c + h2o_c + trdox_c	( BSU17380 and BSU17390 and BSU17370 ) or ( BSU17380 and BSU17390 and BSU20040 and BSU20060 and BSU17370 )	['BSU17380 and BSU20060 and BSU17390', 'BSU20040']	( BSU17380 and BSU17390 ) or ( BSU20040 and BSU20060 )	NrdE (BSU17380/BSU20060) is a ribonucleoside-diphosphate reductase subunit alpha; NrdF (BSU17390/BSU20040) is a ribonucleoside-diphosphate reductase subunit beta.	https://www.genome.jp/brite/bsu00001+BSU17380+BSU17390+BSU20040+BSU20060
Different (Neither is correct)	ARBabc	Unspecified monosaccharide ABC transport system, ATP-binding protein;Multiple sugar ABC transporter, ATP-binding protein(BSU32550);alpha-arabinosides ABC transport system, permease protein araQ(BSU28730);alpha-arabinosides ABC transport system, permease protein araP(BSU28740);alpha-arabinosides ABC transport system, substrate-binding protein araN(BSU28750);Multiple sugar ABC transporter, substrat…	arab__L_e + atp_c + h2o_c --> adp_c + arab__L_c + h_c + pi_c	( BSU28730 and BSU28740 and BSU28750 ) or ( BSU30270 and BSU30280 and BSU30290 ) or ( BSU31540 and BSU31550 and BSU31560 and BSU31570 ) or ( BSU32550 and BSU32580 and BSU32590 and BSU32600 )	['BSU32550 and BSU32600', 'BSU03380 and BSU06980 and BSU06990 and BSU24980 and BSU24970 and BSU32580 and BSU32590', 'BSU31540 and BSU31550 and BSU31560 and BSU31570', 'BSU28740 and BSU28730', 'BSU28750', 'BSU30270', 'BSU30290 and BSU30280 and BSU38810']	BSU28730 and BSU28740 and BSU28750	The ABC transporter complex AraNPQ involved in the uptake of arabinooligosaccharides. AraN (BSU28750) is an arabinose-binding protein; AraP (BSU28740 ) is an L-arabinose transport system permease protein; AraQ (BSU28730) is an L-arabinose transport system permease protein.	https://www.genome.jp/brite/bsu00001+BSU28730+BSU28740+BSU28750
Different (Neither is correct)	GLCabc	Unspecified monosaccharide ABC transport system, ATP-binding protein;Multiple sugar ABC transporter, ATP-binding protein(BSU32550);Multiple sugar ABC transporter, substrate-binding protein(BSU30270);Multiple sugar ABC transporter, membrane-spanning permease protein MsmF(BSU30280);Multiple sugar ABC transporter, membrane-spanning permease protein MsmG(BSU30290);Unspecified monosaccharide ABC trans…	atp_c + glc__D_e + h2o_c --> adp_c + glc__D_c + h_c + pi_c	( BSU31540 and BSU31550 and BSU31560 and BSU31570 ) or ( BSU30270 and BSU30280 and BSU30290 ) or ( BSU32550 and BSU32580 and BSU32590 and BSU32600 )	['BSU32550 and BSU32600', 'BSU03380 and BSU06980 and BSU06990 and BSU24980 and BSU24970 and BSU32580 and BSU32590', 'BSU31540 and BSU31550 and BSU31560 and BSU31570', 'BSU30270', 'BSU30290 and BSU30280 and BSU38810']	BSU35940 and BSU35950 and BSU35960	We found that b2148, b2149, and b2150 are responsible for the ABC transport of galactose and glucose in iML1515. which are similarities to BSU35950 (b2148-38.8%), BSU35940 (b2149-42%), and BSU35960 (b2150-28.7%). BSU35950 is ribose import permease protein, BSU35940 is ribose import ATP-binding protein, BSU35960 is ribose import binding protein, and they form the ABC transporter complex RbsABC.	https://www.uniprot.org/uniprotkb/P0AEE5; https://www.uniprot.org/uniprotkb/P0AAG8; https://www.uniprot.org/uniprotkb/P23200/entry
Different (Neither is correct)	GALabc	Unspecified monosaccharide ABC transport system, ATP-binding protein;Multiple sugar ABC transporter, ATP-binding protein(BSU32550);Multiple sugar ABC transporter, substrate-binding protein(BSU30270);Multiple sugar ABC transporter, membrane-spanning permease protein MsmF(BSU30280);Multiple sugar ABC transporter, membrane-spanning permease protein MsmG(BSU30290);Unspecified monosaccharide ABC trans…	atp_c + gal_e + h2o_c --> adp_c + gal_c + h_c + pi_c	( BSU31540 and BSU31550 and BSU31560 and BSU31570 ) or ( BSU30270 and BSU30280 and BSU30290 ) or ( BSU32550 and BSU32580 and BSU32590 and BSU32600 )	['BSU32550 and BSU32600', 'BSU03380 and BSU06980 and BSU06990 and BSU24980 and BSU24970 and BSU32580 and BSU32590', 'BSU31540 and BSU31550 and BSU31560 and BSU31570', 'BSU30270', 'BSU30290 and BSU30280 and BSU38810']	BSU35940 and BSU35950 and BSU35960	We found that b2148, b2149, and b2150 are responsible for the ABC transport of galactose and glucose in iML1515. which are similarities to BSU35950 (b2148-38.8%), BSU35940 (b2149-42%), and BSU35960 (b2150-28.7%). BSU35950 is ribose import permease protein, BSU35940 is ribose import ATP-binding protein, BSU35960 is ribose import binding protein, and they form the ABC transporter complex RbsABC.	https://www.uniprot.org/uniprotkb/P0AEE5; https://www.uniprot.org/uniprotkb/P0AAG8; https://www.uniprot.org/uniprotkb/P23200/entry
Different (Neither is correct)	XYLabc	Unspecified monosaccharide ABC transport system, ATP-binding protein;Multiple sugar ABC transporter, ATP-binding protein(BSU32550);Multiple sugar ABC transporter, substrate-binding protein(BSU30270);Multiple sugar ABC transporter, membrane-spanning permease protein MsmF(BSU30280);Multiple sugar ABC transporter, membrane-spanning permease protein MsmG(BSU30290);Unspecified monosaccharide ABC trans…	atp_c + h2o_c + xyl__D_e --> adp_c + h_c + pi_c + xyl__D_c	( BSU31540 and BSU31550 and BSU31560 and BSU31570 ) or ( BSU30270 and BSU30280 and BSU30290 ) or ( BSU32550 and BSU32580 and BSU32590 and BSU32600 )	['BSU32550 and BSU32600', 'BSU03380 and BSU06980 and BSU06990 and BSU24980 and BSU24970 and BSU32580 and BSU32590', 'BSU31540 and BSU31550 and BSU31560 and BSU31570', 'BSU30270', 'BSU30290 and BSU30280 and BSU38810']	delete reaction	Bacillus subtilis has been reported to utilize xylose through XylA (BSU17600) and XylB (BSU17610), which encode xylose isomerase and xylulose kinase, respectively. But XylA and XylB do not catalyze this reaction.	doi:10.1007/s00253-014-6131-7
Different (Neither is correct)	GLCGLYCabcpp_syn	Unspecified monosaccharide ABC transport system, ATP-binding protein;Multiple sugar ABC transporter, ATP-binding protein(BSU32550);Multiple sugar ABC transporter, substrate-binding protein(BSU30270);Multiple sugar ABC transporter, membrane-spanning permease protein MsmF(BSU30280);Multiple sugar ABC transporter, membrane-spanning permease protein MsmG(BSU30290);Unspecified monosaccharide ABC trans…	atp_c + glcglyc_e + h2o_c --> adp_c + glcglyc_c + h_c + pi_c	( BSU31540 and BSU31550 and BSU31560 and BSU31570 ) or ( BSU30270 and BSU30280 and BSU30290 ) or ( BSU32550 and BSU32580 and BSU32590 and BSU32600 )	['BSU32550 and BSU32600', 'BSU03380 and BSU06980 and BSU06990 and BSU24980 and BSU24970 and BSU32580 and BSU32590', 'BSU31540 and BSU31550 and BSU31560 and BSU31570', 'BSU30270', 'BSU30290 and BSU30280 and BSU38810']	delete reaction	In UniProt and KEGG, we can not find any gene which is responsible for the Glucosylglycerol ABC transporter in Bacillus subtilis (strain 168).
Different (Neither is correct)	METDabc	Methionine ABC transporter ATP-binding protein;ABC transporter, ATP-binding protein(BSU09070);ABC transporter, ATP-binding protein(BSU09080);Methionine ABC transporter substrate-binding protein(BSU09110);ABC transporter, permease protein(BSU30410);ABC transporter, ATP-binding protein(BSU30450);Methionine ABC transporter substrate-binding protein(BSU32730);Methionine ABC transporter permease prote…	atp_c + h2o_c + met__D_e --> adp_c + h_c + met__D_c + pi_c	( BSU32730 and BSU32740 and BSU32750 ) or ( BSU09070 and BSU09080 and BSU09110 ) or ( BSU30410 and BSU30420 and BSU30450 )	['BSU09070 and BSU09080', 'BSU32750 and BSU32740', 'BSU27440 and BSU02750 and BSU02760 and BSU30450 and BSU30420 and BSU39640 and BSU39630']	BSU32730 and BSU32740 and BSU32750	The ABC transporter complex MetNPQ is responsible for methionine import. MetQ (BSU32730) is a methionine-binding lipoprotein; MetP (BSU32740) is a methionine import system permease protein; MetN (BSU32750) is a methionine import ATP-binding protein.	https://www.genome.jp/brite/bsu00001+BSU32730+BSU32740+BSU32750
Different (Neither is correct)	METabc	Methionine ABC transporter ATP-binding protein;ABC transporter, ATP-binding protein(BSU09070);ABC transporter, ATP-binding protein(BSU09080);Methionine ABC transporter substrate-binding protein(BSU09110);ABC transporter, permease protein(BSU30410);ABC transporter, ATP-binding protein(BSU30450);Methionine ABC transporter substrate-binding protein(BSU32730);Methionine ABC transporter permease prote…	atp_c + h2o_c + met__L_e --> adp_c + h_c + met__L_c + pi_c	( BSU32730 and BSU32740 and BSU32750 ) or ( BSU09070 and BSU09080 and BSU09110 ) or ( BSU30410 and BSU30420 and BSU30450 )	['BSU09070 and BSU09080', 'BSU32750 and BSU32740', 'BSU27440 and BSU02750 and BSU02760 and BSU30450 and BSU30420 and BSU39640 and BSU39630']	BSU32730 and BSU32740 and BSU32750	The ABC transporter complex MetNPQ is responsible for methionine import. MetQ (BSU32730) is a methionine-binding lipoprotein; MetP (BSU32740) is a methionine import system permease protein; MetN (BSU32750) is a methionine import ATP-binding protein.	https://www.genome.jp/brite/bsu00001+BSU32730+BSU32740+BSU32750
Different (Neither is correct)	RIBabc	Ribose ABC transport system, ATP-binding protein RbsA (TC 3.A.1.2.1);Unspecified monosaccharide ABC transport system, ATP-binding protein(BSU31550);Multiple sugar ABC transporter, ATP-binding protein(BSU32550);Ribose ABC transport system, high affinity permease RbsD (TC 3.A.1.2.1)(BSU35930);Multiple sugar ABC transporter, substrate-binding protein(BSU30270);Multiple sugar ABC transporter, membran…	atp_c + h2o_c + rib__D_e --> adp_c + h_c + pi_c + rib__D_c	( BSU35930 and BSU35940 and BSU35950 and BSU35960 ) or ( BSU31540 and BSU31550 and BSU31560 and BSU31570 ) or ( BSU30270 and BSU30280 and BSU30290 ) or ( BSU32550 and BSU32580 and BSU32590 and BSU32600 )	['BSU32550 and BSU32600', 'BSU03380 and BSU06980 and BSU06990 and BSU24980 and BSU24970 and BSU32580 and BSU32590', 'BSU35940 and BSU35960 and BSU35950', 'BSU31540 and BSU31550 and BSU31560 and BSU31570', 'BSU30270', 'BSU30290 and BSU30280 and BSU38810']	BSU35940 and BSU35950 and BSU35960	BSU35940 and BSU35950 and BSU35960 form the ABC transporter complex RbsABC involved in ribose import. RbsB (BSU35960) is a D-ribose-binding protein; RbsC (BSU35950) is a ribose transport system permease; RbsA (BSU35940) is a ribose import ATP-binding protein.	https://www.genome.jp/brite/bsu00001+BSU35940+BSU35950+BSU35960;https://legacy.uniprot.org/uniprot/P36947
Different (Neither is correct)	CELBpts	PTS system, cellobiose-specific IIB component (EC 2.7.1.69);PTS system, cellobiose-specific IIB component (EC 2.7.1.69)|PTS system, lichenan-, cellobiose-specific IIB component (EC 2.7.1.69)(BSU38590);PTS system, cellobiose-specific IIA component (EC 2.7.1.69)(BSU05820);PTS system, cellobiose-specific IIA component (EC 2.7.1.69)(BSU38570);PTS system, cellobiose-specific IIC component (EC 2.7.1.69…	cellb_e + pep_c --> 6pgg_c + pyr_c	( BSU38390 and BSU38570 and BSU38590 ) or ( BSU38570 and BSU38580 and BSU38590 ) or ( BSU05810 and BSU05820 and BSU05830 )	['BSU13900 and BSU13910 BSU38570 and BSU38590 and BSU38580', 'BSU38390', 'BSU13900 and BSU13910 BSU05820 and BSU05810 and BSU05830']	BSU13890 and BSU13900 and BSU39270	We found that b2715 is PTS system arbutin-, cellobiose-, and salicin-specific EIIBC component in iML1515, which are similarities to BSU39270 (b2306-35.3%),BSU39270 is PTS system beta-glucoside-specific EIIBCA component; PtsI (BSU13910) is a phosphoenolpyruvate-protein phosphotransferase; PtsI (BSU13910) is a phosphoenolpyruvate-protein phosphotransferase;	https://www.uniprot.org/uniprotkb/P40739 ; https://www.uniprot.org/uniprotkb/P24241;https://www.uniprot.org/uniprotkb/P20166; https://www.uniprot.org/uniprotkb/P08877
Different (Neither is correct)	NTRIR2x	Nitrite reductase [NAD(P)H] small subunit (EC 1.7.1.4);Nitrite reductase [NAD(P)H] large subunit (EC 1.7.1.4)(BSU03300);Assimilatory nitrate reductase large subunit (EC:1.7.99.4)(BSU03310);Nitrite reductase [NAD(P)H] large subunit (EC 1.7.1.4)(BSU03320)	5.0 h_c + 3.0 nadh_c + no2_c --> 2.0 h2o_c + 3.0 nad_c + nh4_c	BSU03290 and BSU03300 and BSU03310 and BSU03320	['BSU03290', 'BSU03320 and BSU03310']	BSU03290 and BSU03300	BSU03290 is nitrite reductase small subunit; BSU03300 is nitrite reductase large subunit;BSU03310 and BSU03320 are responsible for nitrate reductase	https://www.genome.jp/brite/bsu00001+BSU03290+BSU03300+BSU03310+BSU03320
Different (Neither is correct)	NTRIR2y	Nitrite reductase [NAD(P)H] small subunit (EC 1.7.1.4);Nitrite reductase [NAD(P)H] large subunit (EC 1.7.1.4)(BSU03300);Assimilatory nitrate reductase large subunit (EC:1.7.99.4)(BSU03310);Nitrite reductase [NAD(P)H] large subunit (EC 1.7.1.4)(BSU03320)	5.0 h_c + 3.0 nadph_c + no2_c --> 2.0 h2o_c + 3.0 nadp_c + nh4_c	BSU03290 and BSU03300 and BSU03310 and BSU03320	['BSU03290', 'BSU03320 and BSU03310']	BSU03290 and BSU03300	BSU03290 is nitrite reductase small subunit; BSU03300 is nitrite reductase large subunit;BSU03310 and BSU03320 are responsible for nitrate reductase	https://www.genome.jp/brite/bsu00001+BSU03290+BSU03300+BSU03310+BSU03320
Different (Neither is correct)	MAL_Dt2	TRAP-type C4-dicarboxylate transport system, periplasmic component;C4-dicarboxylate transport protein(BSU04470);2-oxoglutarate/malate translocator(BSU07570);Malate permease(BSU37040)	h_e + mal__D_e <=> h_c + mal__D_c	BSU07570 or BSU37040 or ( BSU04440 and BSU04470 )	['BSU04440']	BSU38770 or BSU07570	Both BSU38770 and BSU07570 function as malate transporters.	https://legacy.uniprot.org/uniprot/P94363;https://legacy.uniprot.org/uniprot/O34726;
Different (Neither is correct)	R03270	Pyruvate dehydrogenase E1 component alpha subunit (EC 1.2.4.1);Pyruvate dehydrogenase E1 component beta subunit (EC 1.2.4.1)(BSU14590)	2ahethmpp_c + lpam_c <=> adhlam_c + thmpp_c	BSU14580 and BSU14590	['BSU14580 and BSU14590']	delete reaction	This reaction is part of the pyruvate dehydrogenase, we added reaction 'PDH' to achieve direct conversion of 'pyr' to 'accoa' just like iML1515, therefore we removed this reaction
Different (Neither is correct)	PDHam1hi	Pyruvate dehydrogenase E1 component alpha subunit (EC 1.2.4.1);Pyruvate dehydrogenase E1 component beta subunit (EC 1.2.4.1)(BSU14590);Acetolactate synthase small subunit (EC 2.2.1.6)(BSU28300);Acetolactate synthase large subunit (EC 2.2.1.6)(BSU28310);Acetolactate synthase, catabolic (EC 2.2.1.6)(BSU36010)	h_c + pyr_c + thmpp_c --> 2ahethmpp_c + co2_c	( BSU14580 and BSU14590 ) or ( BSU28300 and BSU28310 ) or BSU36010	['BSU14580 and BSU14590', 'BSU28310 and BSU28300']	delete reaction	This reaction is part of the pyruvate dehydrogenase, we added reaction 'PDH' to achieve direct conversion of 'pyr' to 'accoa' just like iML1515, therefore we removed this reaction	https://legacy.uniprot.org/uniprot/P21881;https://legacy.uniprot.org/uniprot/P21882;
Different (Neither is correct)	GLYCL	Glycine dehydrogenase [decarboxylating] (glycine cleavage system P2 protein) (EC 1.4.4.2);Glycine dehydrogenase [decarboxylating] (glycine cleavage system P1 protein) (EC 1.4.4.2)(BSU24560);Aminomethyltransferase (glycine cleavage system T protein) (EC 2.1.2.10)(BSU24570);Glycine cleavage system H protein(BSU32800)	gly_c + nad_c + thf_c --> co2_c + mlthf_c + nadh_c + nh4_c	BSU24550 and BSU24560 and BSU24570 and BSU32800	['BSU24560 and BSU24550']	BSU24550 and BSU24560 and BSU24570 and BSU32800 and BSU14610	A protein complex that catalyzes the reversible oxidation of glycine. it has four components: dihydrolipoamide dehydrogenase(?), glycine dehydrogenase (gcvPA-BSU24560;gcvPB-BSU24550), lipoyl-GcvH-protein (gcvH-BSU32800) and aminomethyltransferase(gcvT-BSU24570), also known as L, P, H, and T. In E.coli, L protein (dihydrolipoamide dehydrogenase) is LpdA, which is 47.4% with PdhD(BSU14610).	https://bsubcyc.org/BSUB/NEW-IMAGE?object=GO:0005960; https://legacy.uniprot.org/uniprot/P54377;https://legacy.uniprot.org/uniprot/P54376;https://legacy.uniprot.org/uniprot/P54378;https://legacy.uniprot.org/uniprot/O32174; https://legacy.uniprot.org/uniprot/P21880; https://legacy.uniprot.org/uniprot/P0A9P0
Different (Neither is correct)	HISabc	Histidine ABC transporter, ATP-binding protein HisP (TC 3.A.1.3.1);Probable amino-acid ABC transporter permease protein ytmM(BSU29350);Probable amino-acid ABC transporter permease protein ytmM(BSU29360);putative periplasmic binding transport protein(BSU29380)	atp_c + h2o_c + his__L_e --> adp_c + h_c + his__L_c + pi_c	BSU29340 and BSU29350 and BSU29360 and BSU29380	['BSU03610 and BSU03600 and BSU03590 and BSU29380 and BSU29370 and BSU29360 and BSU29350 and BSU29340']	BSU39500 and BSU39490 and BSU39480	We found that b2306, b2307, b2308 and b2309 are responsible for histidine transport system in iML1515, which are similarities to BSU39480 (b2306-43.1%), BSU39490 (b2307-32.5%&b2308-29.9%), and BSU39500 (b2309-27.6%);BSU39480 is probable amino-acid import ATP-binding protein YxeO;BSU39480 is probable amino-acid permease protein YxeN；BSU39500 is probable amino-acid-binding protein YxeM; and they fo…	https://legacy.uniprot.org/uniprot/P54952;https://legacy.uniprot.org/uniprot/P54953;https://legacy.uniprot.org/uniprot/P54954;
Different (Neither is correct)	FE3tex	Ferrous iron transport peroxidase EfeB;Ferrous iron transport periplasmic protein EfeO(BSU38270)	fe3_e --> fe3_c	BSU38260 and BSU38270	['BSU38270']	delete reaction	In BIGG, the reaction was almost exclusively seen in E. coli with the Shigella sonnei model, and no Bacillus subtilis iron diffusion-related genes could be found in the UNIPROT, KEGG database。	http://bigg.ucsd.edu/universal/reactions/FE3tex
Different (Neither is correct)	MALt2r	TRAP-type C4-dicarboxylate transport system, periplasmic component;C4-dicarboxylate transport protein(BSU04470);2-oxoglutarate/malate translocator(BSU07570);Malate permease(BSU37040);L-Malate Citrate symporter (TC 2.A.24.2.4)(BSU38770)	h_e + mal__L_e <-- h_c + mal__L_c	BSU38770 or BSU07570 or BSU37040 or ( BSU04440 and BSU04470 )	['BSU04440']	BSU38770 or BSU07570	Both BSU38770 and BSU07570 function as malate transporters.	https://legacy.uniprot.org/uniprot/P94363;https://legacy.uniprot.org/uniprot/O34726;
Different (Neither is correct)	RIBabc1	Ribose ABC transport system, ATP-binding protein RbsA (TC 3.A.1.2.1);Ribose ABC transport system, high affinity permease RbsD (TC 3.A.1.2.1)(BSU35930);Ribose ABC transport system, permease protein RbsC (TC 3.A.1.2.1)(BSU35950);Ribose ABC transport system, periplasmic ribose-binding protein RbsB (TC 3.A.1.2.1)(BSU35960)	atp_c + h2o_c + rib__D_c --> adp_c + h_c + pi_c + rib__D_e	BSU35930 and BSU35940 and BSU35950 and BSU35960	['BSU35940 and BSU35960 and BSU35950']	delete reaction	This reaction, which transports Ribose from intracellular to extracellular rather than extracellular to intracellular, is abnormal. This reaction is only present in two models in the BIGG database, and we did not find any genes related to this reaction in uniprot
Different (Neither is correct)	MANpts	Phosphocarrier protein of PTS system	man_e + pep_c --> man6p_c + pyr_c	BSU12010 and BSU13900 and BSU13910	['BSU13900 and BSU13910 and BSU12010']	BSU13900 and BSU13910 and BSU27070 and BSU27060 and BSU27050 and BSU27040	We found that b1817 and b1818 and b1819 are PTS system mannose-specific EII component in iML1515, which are similarities to BSU27060(b1817-47.5%),BSU27070(b1817-37.5%),BSU27050(b1818-57.8%) and BSU27040(b1819-61%).BSU27060 is PTS system fructose-specific EIIB component;BSU27070 is PTS system fructose-specific EIIA component;BSU27050 is PTS system fructose-specific EIIC component;BSU27040 is PTS s…	https://www.uniprot.org/uniprotkb/P26380;https://www.uniprot.org/uniprotkb/P26379/entry;https://www.uniprot.org/uniprotkb/P26381/entry;https://www.uniprot.org/uniprotkb/P26382/entry
Same	CYTB_B2	Cytochrome d ubiquinol oxidase subunit I (EC 1.10.3.-);Cytochrome d ubiquinol oxidase subunit II (EC 1.10.3.-)(BSU38750);(BSU30720)	2.0 h_c + 0.5 o2_c --> C00828_c + h2o_c + 2.0 h_e	( BSU30710 and BSU30720 ) or ( BSU38750 and BSU38760 )	['BSU30710 and BSU30720', 'BSU38760 and BSU38750']	( BSU30710 and BSU30720 ) or ( BSU38750 and BSU38760 )	BSU38760 cydA; cytochrome d ubiquinol oxidase subunit 1 ;BSU38750 cydB; cytochrome d ubiquinol oxidase subunit 2 |BSU30710 ythA; cytochrome bd menaquinol oxidase subunit I |BSU30720 ythB; cytochrome bd menaquinol oxidase subunit II	https://www.genome.jp/brite/bsu00001+BSU30710+BSU30720+BSU38750+BSU38760
Same	GLYBabc	Glycine betaine ABC transport system, ATP-binding protein OpuAA (EC 3.6.3.32);Glycine betaine ABC transport system, permease protein OpuAB(BSU02990);Glycine betaine ABC transport system, glycine betaine-binding protein OpuAC(BSU03000)	atp_c + glyb_e + h2o_c --> adp_c + glyb_c + h_c + pi_c	BSU02980 and BSU02990 and BSU03000	['BSU03000 and BSU02980 and BSU02990']	BSU02980 and BSU02990 and BSU03000
Same	CTBTabcpp	Glycine betaine ABC transport system, ATP-binding protein OpuAA (EC 3.6.3.32);Glycine betaine ABC transport system, permease protein OpuAB(BSU02990);Glycine betaine ABC transport system, glycine betaine-binding protein OpuAC(BSU03000)	atp_c + ctbt_e + h2o_c --> adp_c + ctbt_c + h_c + pi_c	BSU02980 and BSU02990 and BSU03000	['BSU03000 and BSU02980 and BSU02990']	BSU02980 and BSU02990 and BSU03000
Same	rxn05193	Glycine betaine ABC transport system, ATP-binding protein OpuAA (EC 3.6.3.32);Glycine betaine ABC transport system, permease protein OpuAB(BSU02990);Glycine betaine ABC transport system, glycine betaine-binding protein OpuAC(BSU03000)	atp_c + btbet_e + h2o_c --> adp_c + btbet_c + h_c + pi_c	BSU02980 and BSU02990 and BSU03000	['BSU03000 and BSU02980 and BSU02990']	BSU02980 and BSU02990 and BSU03000
Same	ARSENBabc	Glycine betaine ABC transport system, ATP-binding protein OpuAA (EC 3.6.3.32);Glycine betaine ABC transport system, permease protein OpuAB(BSU02990);Glycine betaine ABC transport system, glycine betaine-binding protein OpuAC(BSU03000)	arsbet_e + atp_c + h2o_c --> adp_c + arsbet_c + h_c + pi_c	BSU02980 and BSU02990 and BSU03000	['BSU03000 and BSU02980 and BSU02990']	BSU02980 and BSU02990 and BSU03000
Same	GBBTNabc	Glycine betaine ABC transport system, ATP-binding protein OpuAA (EC 3.6.3.32);Glycine betaine ABC transport system, permease protein OpuAB(BSU02990);Glycine betaine ABC transport system, glycine betaine-binding protein OpuAC(BSU03000)	4tmeabutn_e + atp_c + h2o_c --> 4tmeabutn_c + adp_c + h_c + pi_c	BSU02980 and BSU02990 and BSU03000	['BSU03000 and BSU02980 and BSU02990']	BSU02980 and BSU02990 and BSU03000
Same	rxn10072	Glycine betaine ABC transport system, ATP-binding protein OpuAA (EC 3.6.3.32);Glycine betaine ABC transport system, permease protein OpuAB(BSU02990);Glycine betaine ABC transport system, glycine betaine-binding protein OpuAC(BSU03000)	atp_c + gbbtn_e + h2o_c --> adp_c + gbbtn_c + h_c + pi_c	BSU02980 and BSU02990 and BSU03000	['BSU03000 and BSU02980 and BSU02990']	BSU02980 and BSU02990 and BSU03000
Same	PROLBabc	Glycine betaine ABC transport system, ATP-binding protein OpuAA (EC 3.6.3.32);Glycine betaine ABC transport system, permease protein OpuAB(BSU02990);Glycine betaine ABC transport system, glycine betaine-binding protein OpuAC(BSU03000)	atp_c + h2o_c + prolb_e --> adp_c + h_c + pi_c + prolb_c	BSU02980 and BSU02990 and BSU03000	['BSU03000 and BSU02980 and BSU02990']	BSU02980 and BSU02990 and BSU03000
Same	GLYabc	Glycine betaine ABC transport system, ATP-binding protein OpuAA (EC 3.6.3.32);Glycine betaine ABC transport system, permease protein OpuAB(BSU02990);Glycine betaine ABC transport system, glycine betaine-binding protein OpuAC(BSU03000)	atp_c + gly_e + h2o_c --> adp_c + gly_c + h_c + pi_c	BSU02980 and BSU02990 and BSU03000	['BSU03000 and BSU02980 and BSU02990']	BSU02980 and BSU02990 and BSU03000
Same	PRFGS	Phosphoribosylformylglycinamidine synthase, glutamine amidotransferase subunit (EC 6.3.5.3);Phosphoribosylformylglycinamidine synthase, synthetase subunit (EC 6.3.5.3)(BSU06480);Phosphoribosylformylglycinamidine synthase, PurS subunit (EC 6.3.5.3)(BSU06460)	atp_c + fgam_c + gln__L_c + h2o_c --> adp_c + fpram_c + glu__L_c + h_c + pi_c	BSU06460 and BSU06470 and BSU06480	['BSU06480 and BSU06470 and BSU06460']	BSU06460 and BSU06470 and BSU06480
Same	HEMEti	Ferrichrome transport ATP-binding protein FhuC (TC 3.A.1.14.3);Heme ABC type transporter HtsABC, permease protein HtsC(BSU07500);Heme ABC type transporter HtsABC, permease protein HtsB(BSU07510);Heme ABC type transporter HtsABC, heme-binding protein(BSU07520)	atp_c + h2o_c + pheme_e --> adp_c + h_c + pheme_c + pi_c	BSU07490 and BSU07500 and BSU07510 and BSU07520	['BSU07520 and BSU07510 and BSU07500 and BSU07490']	BSU07490 and BSU07500 and BSU07510 and BSU07520
Same	TAURabc	Alkanesulfonates ABC transporter ATP-binding protein;Alkanesulfonates-binding protein(BSU08840);Alkanesulfonates transport system permease protein(BSU08850)	atp_c + h2o_c + taur_e --> adp_c + h_c + pi_c + taur_c	BSU08830 and BSU08840 and BSU08850	['BSU08840 and BSU08830 and BSU08850']	BSU08830 and BSU08840 and BSU08850
Same	BUTSabc	Alkanesulfonates ABC transporter ATP-binding protein;Alkanesulfonates-binding protein(BSU08840);Alkanesulfonates transport system permease protein(BSU08850)	atp_c + butso3_e + h2o_c --> adp_c + butso3_c + h_c + pi_c	BSU08830 and BSU08840 and BSU08850	['BSU08840 and BSU08830 and BSU08850']	BSU08830 and BSU08840 and BSU08850
Same	ETHSO3abcpp	Alkanesulfonates ABC transporter ATP-binding protein;Alkanesulfonates-binding protein(BSU08840);Alkanesulfonates transport system permease protein(BSU08850)	atp_c + ethso3_e + h2o_c --> adp_c + ethso3_c + h_c + pi_c	BSU08830 and BSU08840 and BSU08850	['BSU08840 and BSU08830 and BSU08850']	BSU08830 and BSU08840 and BSU08850
Same	HEXSabc	Alkanesulfonates ABC transporter ATP-binding protein;Alkanesulfonates-binding protein(BSU08840);Alkanesulfonates transport system permease protein(BSU08850)	atp_c + h2o_c + hexs_e --> adp_c + h_c + hexs_c + pi_c	BSU08830 and BSU08840 and BSU08850	['BSU08840 and BSU08830 and BSU08850']	BSU08830 and BSU08840 and BSU08850
Same	ISTNTabc	Alkanesulfonates ABC transporter ATP-binding protein;Alkanesulfonates-binding protein(BSU08840);Alkanesulfonates transport system permease protein(BSU08850)	atp_c + h2o_c + isetac_e --> adp_c + h_c + isetac_c + pi_c	BSU08830 and BSU08840 and BSU08850	['BSU08840 and BSU08830 and BSU08850']	BSU08830 and BSU08840 and BSU08850
Same	LCYSTabcpp	Alkanesulfonates ABC transporter ATP-binding protein;Alkanesulfonates-binding protein(BSU08840);Alkanesulfonates transport system permease protein(BSU08850)	Lcyst_e + atp_c + h2o_c --> Lcyst_c + adp_c + h_c + pi_c	BSU08830 and BSU08840 and BSU08850	['BSU08840 and BSU08830 and BSU08850']	BSU08830 and BSU08840 and BSU08850
Same	MOPSabc	Alkanesulfonates ABC transporter ATP-binding protein;Alkanesulfonates-binding protein(BSU08840);Alkanesulfonates transport system permease protein(BSU08850)	atp_c + h2o_c + mops_e --> adp_c + h_c + mops_c + pi_c	BSU08830 and BSU08840 and BSU08850	['BSU08840 and BSU08830 and BSU08850']	BSU08830 and BSU08840 and BSU08850
Same	MSO3abc	Alkanesulfonates ABC transporter ATP-binding protein;Alkanesulfonates-binding protein(BSU08840);Alkanesulfonates transport system permease protein(BSU08850)	atp_c + h2o_c + mso3_e --> adp_c + h_c + mso3_c + pi_c	BSU08830 and BSU08840 and BSU08850	['BSU08840 and BSU08830 and BSU08850']	BSU08830 and BSU08840 and BSU08850
Same	SULAabc	Alkanesulfonates ABC transporter ATP-binding protein;Alkanesulfonates-binding protein(BSU08840);Alkanesulfonates transport system permease protein(BSU08850)	atp_c + h2o_c + sulfac_e --> adp_c + h_c + pi_c + sulfac_c	BSU08830 and BSU08840 and BSU08850	['BSU08840 and BSU08830 and BSU08850']	BSU08830 and BSU08840 and BSU08850
Same	DIPEPabc1	Dipeptide transport system permease protein dppB (TC 3.A.1.5.2);Dipeptide transport system permease protein dppC (TC 3.A.1.5.2)(BSU12940);Dipeptide transport ATP-binding protein dppD (TC 3.A.1.5.2)(BSU12950);Dipeptide-binding ABC transporter, periplasmic substrate-binding component (TC 3.A.1.5.2)(BSU12960)	ala_L_asp__L_e + atp_c + h2o_c --> adp_c + ala_L_asp__L_c + h_c + pi_c	BSU12930 and BSU12940 and BSU12950 and BSU12960	['BSU12930 and BSU12940 and BSU12950 and BSU12960']	BSU12930 and BSU12940 and BSU12950 and BSU12960
Same	DIPEPabc10	Dipeptide transport system permease protein dppB (TC 3.A.1.5.2);Dipeptide transport system permease protein dppC (TC 3.A.1.5.2)(BSU12940);Dipeptide transport ATP-binding protein dppD (TC 3.A.1.5.2)(BSU12950);Dipeptide-binding ABC transporter, periplasmic substrate-binding component (TC 3.A.1.5.2)(BSU12960)	atp_c + gly_glu__L_e + h2o_c --> adp_c + gly_glu__L_c + h_c + pi_c	BSU12930 and BSU12940 and BSU12950 and BSU12960	['BSU12930 and BSU12940 and BSU12950 and BSU12960']	BSU12930 and BSU12940 and BSU12950 and BSU12960
Same	DIPEPabc11	Dipeptide transport system permease protein dppB (TC 3.A.1.5.2);Dipeptide transport system permease protein dppC (TC 3.A.1.5.2)(BSU12940);Dipeptide transport ATP-binding protein dppD (TC 3.A.1.5.2)(BSU12950);Dipeptide-binding ABC transporter, periplasmic substrate-binding component (TC 3.A.1.5.2)(BSU12960)	atp_c + gly_met__L_e + h2o_c --> adp_c + gly_met__L_c + h_c + pi_c	BSU12930 and BSU12940 and BSU12950 and BSU12960	['BSU12930 and BSU12940 and BSU12950 and BSU12960']	BSU12930 and BSU12940 and BSU12950 and BSU12960
Same	DIPEPabc12	Dipeptide transport system permease protein dppB (TC 3.A.1.5.2);Dipeptide transport system permease protein dppC (TC 3.A.1.5.2)(BSU12940);Dipeptide transport ATP-binding protein dppD (TC 3.A.1.5.2)(BSU12950);Dipeptide-binding ABC transporter, periplasmic substrate-binding component (TC 3.A.1.5.2)(BSU12960)	atp_c + h2o_c + met_L_ala__L_e --> adp_c + h_c + met_L_ala__L_c + pi_c	BSU12930 and BSU12940 and BSU12950 and BSU12960	['BSU12930 and BSU12940 and BSU12950 and BSU12960']	BSU12930 and BSU12940 and BSU12950 and BSU12960
Same	DIPEPabc13	Dipeptide transport system permease protein dppB (TC 3.A.1.5.2);Dipeptide transport system permease protein dppC (TC 3.A.1.5.2)(BSU12940);Dipeptide transport ATP-binding protein dppD (TC 3.A.1.5.2)(BSU12950);Dipeptide-binding ABC transporter, periplasmic substrate-binding component (TC 3.A.1.5.2)(BSU12960)	atp_c + cpd11589_e + h2o_c --> adp_c + cpd11589_c + h_c + pi_c	BSU12930 and BSU12940 and BSU12950 and BSU12960	['BSU12930 and BSU12940 and BSU12950 and BSU12960']	BSU12930 and BSU12940 and BSU12950 and BSU12960
Same	DIPEPabc14	Dipeptide transport system permease protein dppB (TC 3.A.1.5.2);Dipeptide transport system permease protein dppC (TC 3.A.1.5.2)(BSU12940);Dipeptide transport ATP-binding protein dppD (TC 3.A.1.5.2)(BSU12950);Dipeptide-binding ABC transporter, periplasmic substrate-binding component (TC 3.A.1.5.2)(BSU12960)	atp_c + gly_pro__L_e + h2o_c --> adp_c + gly_pro__L_c + h_c + pi_c	BSU12930 and BSU12940 and BSU12950 and BSU12960	['BSU12930 and BSU12940 and BSU12950 and BSU12960']	BSU12930 and BSU12940 and BSU12950 and BSU12960
Same	DIPEPabc15	Dipeptide transport system permease protein dppB (TC 3.A.1.5.2);Dipeptide transport system permease protein dppC (TC 3.A.1.5.2)(BSU12940);Dipeptide transport ATP-binding protein dppD (TC 3.A.1.5.2)(BSU12950);Dipeptide-binding ABC transporter, periplasmic substrate-binding component (TC 3.A.1.5.2)(BSU12960)	atp_c + cgly_e + h2o_c --> adp_c + cgly_c + h_c + pi_c	BSU12930 and BSU12940 and BSU12950 and BSU12960	['BSU12930 and BSU12940 and BSU12950 and BSU12960']	BSU12930 and BSU12940 and BSU12950 and BSU12960
Same	DIPEPabc2	Dipeptide transport system permease protein dppB (TC 3.A.1.5.2);Dipeptide transport system permease protein dppC (TC 3.A.1.5.2)(BSU12940);Dipeptide transport ATP-binding protein dppD (TC 3.A.1.5.2)(BSU12950);Dipeptide-binding ABC transporter, periplasmic substrate-binding component (TC 3.A.1.5.2)(BSU12960)	ala_L_gln__L_e + atp_c + h2o_c --> adp_c + ala_L_gln__L_c + h_c + pi_c	BSU12930 and BSU12940 and BSU12950 and BSU12960	['BSU12930 and BSU12940 and BSU12950 and BSU12960']	BSU12930 and BSU12940 and BSU12950 and BSU12960
Same	DIPEPabc3	Dipeptide transport system permease protein dppB (TC 3.A.1.5.2);Dipeptide transport system permease protein dppC (TC 3.A.1.5.2)(BSU12940);Dipeptide transport ATP-binding protein dppD (TC 3.A.1.5.2)(BSU12950);Dipeptide-binding ABC transporter, periplasmic substrate-binding component (TC 3.A.1.5.2)(BSU12960)	ala_L_glu__L_e + atp_c + h2o_c --> adp_c + ala_L_glu__L_c + h_c + pi_c	BSU12930 and BSU12940 and BSU12950 and BSU12960	['BSU12930 and BSU12940 and BSU12950 and BSU12960']	BSU12930 and BSU12940 and BSU12950 and BSU12960
Same	DIPEPabc4	Dipeptide transport system permease protein dppB (TC 3.A.1.5.2);Dipeptide transport system permease protein dppC (TC 3.A.1.5.2)(BSU12940);Dipeptide transport ATP-binding protein dppD (TC 3.A.1.5.2)(BSU12950);Dipeptide-binding ABC transporter, periplasmic substrate-binding component (TC 3.A.1.5.2)(BSU12960)	L_alagly_e + atp_c + h2o_c --> L_alagly_c + adp_c + h_c + pi_c	BSU12930 and BSU12940 and BSU12950 and BSU12960	['BSU12930 and BSU12940 and BSU12950 and BSU12960']	BSU12930 and BSU12940 and BSU12950 and BSU12960
Same	DIPEPabc5	Dipeptide transport system permease protein dppB (TC 3.A.1.5.2);Dipeptide transport system permease protein dppC (TC 3.A.1.5.2)(BSU12940);Dipeptide transport ATP-binding protein dppD (TC 3.A.1.5.2)(BSU12950);Dipeptide-binding ABC transporter, periplasmic substrate-binding component (TC 3.A.1.5.2)(BSU12960)	ala_his_e + atp_c + h2o_c --> adp_c + ala_his_c + h_c + pi_c	BSU12930 and BSU12940 and BSU12950 and BSU12960	['BSU12930 and BSU12940 and BSU12950 and BSU12960']	BSU12930 and BSU12940 and BSU12950 and BSU12960
Same	DIPEPabc6	Dipeptide transport system permease protein dppB (TC 3.A.1.5.2);Dipeptide transport system permease protein dppC (TC 3.A.1.5.2)(BSU12940);Dipeptide transport ATP-binding protein dppD (TC 3.A.1.5.2)(BSU12950);Dipeptide-binding ABC transporter, periplasmic substrate-binding component (TC 3.A.1.5.2)(BSU12960)	ala_L_leu__L_e + atp_c + h2o_c --> adp_c + ala_L_leu__L_c + h_c + pi_c	BSU12930 and BSU12940 and BSU12950 and BSU12960	['BSU12930 and BSU12940 and BSU12950 and BSU12960']	BSU12930 and BSU12940 and BSU12950 and BSU12960
Same	DIPEPabc7	Dipeptide transport system permease protein dppB (TC 3.A.1.5.2);Dipeptide transport system permease protein dppC (TC 3.A.1.5.2)(BSU12940);Dipeptide transport ATP-binding protein dppD (TC 3.A.1.5.2)(BSU12950);Dipeptide-binding ABC transporter, periplasmic substrate-binding component (TC 3.A.1.5.2)(BSU12960)	ala_L_Thr__L_e + atp_c + h2o_c --> adp_c + ala_L_Thr__L_c + h_c + pi_c	BSU12930 and BSU12940 and BSU12950 and BSU12960	['BSU12930 and BSU12940 and BSU12950 and BSU12960']	BSU12930 and BSU12940 and BSU12950 and BSU12960
Same	DIPEPabc8	Dipeptide transport system permease protein dppB (TC 3.A.1.5.2);Dipeptide transport system permease protein dppC (TC 3.A.1.5.2)(BSU12940);Dipeptide transport ATP-binding protein dppD (TC 3.A.1.5.2)(BSU12950);Dipeptide-binding ABC transporter, periplasmic substrate-binding component (TC 3.A.1.5.2)(BSU12960)	atp_c + gly_asn__L_e + h2o_c --> adp_c + gly_asn__L_c + h_c + pi_c	BSU12930 and BSU12940 and BSU12950 and BSU12960	['BSU12930 and BSU12940 and BSU12950 and BSU12960']	BSU12930 and BSU12940 and BSU12950 and BSU12960
Same	DIPEPabc9	Dipeptide transport system permease protein dppB (TC 3.A.1.5.2);Dipeptide transport system permease protein dppC (TC 3.A.1.5.2)(BSU12940);Dipeptide transport ATP-binding protein dppD (TC 3.A.1.5.2)(BSU12950);Dipeptide-binding ABC transporter, periplasmic substrate-binding component (TC 3.A.1.5.2)(BSU12960)	atp_c + gly_gln__L_e + h2o_c --> adp_c + gly_gln__L_c + h_c + pi_c	BSU12930 and BSU12940 and BSU12950 and BSU12960	['BSU12930 and BSU12940 and BSU12950 and BSU12960']	BSU12930 and BSU12940 and BSU12950 and BSU12960
Same	THMabc	Duplicated ATPase component YkoD of energizing module of thiamin-regulated ECF transporter for HydroxyMethylPyrimidine;Transmembrane component YkoC of energizing module of thiamin-regulated ECF transporter for HydroxyMethylPyrimidine(BSU13210);Substrate-specific component YkoE of thiamin-regulated ECF transporter for HydroxyMethylPyrimidine(BSU13230);Additional substrate-binding component of thia…	atp_c + h2o_c + thm_e --> adp_c + h_c + pi_c + thm_c	BSU13210 and BSU13220 and BSU13230 and BSU13240	['BSU13210 and BSU13220 and BSU13230 and BSU13240']	BSU13210 and BSU13220 and BSU13230 and BSU13240
Same	GAMpts	Phosphoenolpyruvate-protein phosphotransferase of PTS system (EC 2.7.3.9);PTS system, Glucosamine-specific IIA component (EC 2.7.1.69)|PTS system, Glucosamine-specific IIB component (EC 2.7.1.69)|PTS system, Glucosamine-specific IIC component (EC 2.7.1.69)(BSU02350);Phosphocarrier protein of PTS system(BSU13900)	gam_e + pep_c --> gam6p_c + pyr_c	BSU13900 and BSU13910 and BSU02350	['BSU13900 and BSU13910 and BSU02350']	BSU13900 and BSU13910 and BSU02350
Same	ACGApts	PTS system, N-acetylglucosamine-specific IIB component (EC 2.7.1.69)|PTS system, N-acetylglucosamine-specific IIC component (EC 2.7.1.69);Phosphoenolpyruvate-protein phosphotransferase of PTS system (EC 2.7.3.9)(BSU13910);Phosphocarrier protein of PTS system(BSU13900)	acgam_e + pep_c --> acgam6p_c + pyr_c	BSU13900 and BSU13910 and BSU07700	['BSU13900 and BSU13910 and BSU07700']	BSU13900 and BSU13910 and BSU07700
Same	TREpts	PTS system, trehalose-specific IIB component (EC 2.7.1.69)|PTS system, trehalose-specific IIC component (EC 2.7.1.69);Phosphoenolpyruvate-protein phosphotransferase of PTS system (EC 2.7.3.9)(BSU13910);Phosphocarrier protein of PTS system(BSU13900)	pep_c + tre_e --> pyr_c + tre6p_c	BSU13900 and BSU13910 and BSU07800	['BSU13900 and BSU13910 and BSU07800']	BSU13900 and BSU13910 and BSU07800
Same	MALTpts	PTS system, maltose and glucose-specific IIB component (EC 2.7.1.69)|PTS system, maltose and glucose-specific IIC component (EC 2.7.1.69);Phosphoenolpyruvate-protein phosphotransferase of PTS system (EC 2.7.3.9)(BSU13910);Phosphocarrier protein of PTS system(BSU13900)	malt_e + pep_c --> malt6p_c + pyr_c	BSU13900 and BSU13910 and BSU08200	['BSU13900 and BSU13910 and BSU08200']	BSU13900 and BSU13910 and BSU08200
Same	SUCpts	Phosphoenolpyruvate-protein phosphotransferase of PTS system (EC 2.7.3.9);PTS system, sucrose-specific IIB component (EC 2.7.1.69)|PTS system, sucrose-specific IIC component (EC 2.7.1.69)(BSU38050);PTS system, sucrose-specific IIB component; PTS system, sucrose-specific IIC component(BSU38410);Phosphocarrier protein of PTS system(BSU13900)	pep_c + sucr_e --> pyr_c + suc6p_c	BSU13900 and BSU13910 and BSU38050	['BSU13900 and BSU13910 and BSU38050']	BSU13900 and BSU13910 and BSU38050
Same	SALCpts	Phosphoenolpyruvate-protein phosphotransferase of PTS system (EC 2.7.3.9);PTS system, beta-glucoside-specific IIA component (EC 2.7.1.69)|PTS system, beta-glucoside-specific IIB component (EC 2.7.1.69)|PTS system, beta-glucoside-specific IIC component (EC 2.7.1.69)(BSU39270);Phosphocarrier protein of PTS system(BSU13900)	pep_c + salcn_e --> pyr_c + salcn6p_c	BSU13900 and BSU13910 and BSU39270	['BSU13900 and BSU13910 and BSU39270']	BSU13900 and BSU13910 and BSU39270
Same	ARBTptspp	Phosphoenolpyruvate-protein phosphotransferase of PTS system (EC 2.7.3.9);PTS system, beta-glucoside-specific IIA component (EC 2.7.1.69)|PTS system, beta-glucoside-specific IIB component (EC 2.7.1.69)|PTS system, beta-glucoside-specific IIC component (EC 2.7.1.69)(BSU39270);Phosphocarrier protein of PTS system(BSU13900)	arbt_e + pep_c --> arbt6p_c + pyr_c	BSU13900 and BSU13910 and BSU39270	['BSU13900 and BSU13910 and BSU39270']	BSU13900 and BSU13910 and BSU39270
Same	CYOO3	Cytochrome c oxidase polypeptide II (EC 1.9.3.1);Cytochrome c oxidase polypeptide I (EC 1.9.3.1)(BSU14900);Cytochrome c oxidase polypeptide III (EC 1.9.3.1)(BSU14910);Cytochrome c oxidase, subunit IV (EC 1.9.3.1)(BSU14920)	2.0 focytc_c + 6.0 h_c + 0.5 o2_c --> 2.0 ficytC_c + h2o_c + 4.0 h_e	BSU14890 and BSU14900 and BSU14910 and BSU14920	['BSU14890 and BSU14900 and BSU14910 and BSU14920']	BSU14890 and BSU14900 and BSU14910 and BSU14920
Same	DHORDfum	Dihydroorotate dehydrogenase, catalytic subunit (EC 1.3.3.1);Dihydroorotate dehydrogenase electron transfer subunit (EC 1.3.3.1)(BSU15530)	dhor__S_c + o2_c --> h2o2_c + orot_c	BSU15530 and BSU15540	['BSU15540 and BSU15530']	BSU15530 and BSU15540
Same	SERD_L	L-serine dehydratase, beta subunit (EC 4.3.1.17);L-serine dehydratase, alpha subunit (EC 4.3.1.17)(BSU15860)	ser__L_c --> nh4_c + pyr_c	BSU15850 and BSU15860	['BSU15860 and BSU15850']	BSU15850 and BSU15860
Same	SUCOAS	Succinyl-CoA ligase [ADP-forming] beta chain (EC 6.2.1.5);Succinyl-CoA ligase [ADP-forming] alpha chain (EC 6.2.1.5)(BSU16100)	atp_c + coa_c + succ_c <=> adp_c + pi_c + succoa_c	BSU16090 and BSU16100	['BSU16090 and BSU16100']	BSU16090 and BSU16100
Same	BUTCT	Acetoacetyl-CoA transferase, beta subunit (EC 2.8.3.8);Acetoacetyl-CoA transferase, alpha subunit (EC 2.8.3.8)(BSU19730)	ac_c + btcoa_c <=> C00246_c + accoa_c	BSU19720 and BSU19730	['BSU19720 and BSU19730']	BSU19720 and BSU19730
Same	CYOR3m	Menaquinone-cytochrome C oxidoreductase, cytochrome C subunit;Menaquinone-cytochrome c reductase, cytochrome B subunit(BSU22550);Menaquinone-cytochrome C reductase iron-sulfur subunit(BSU22560)	2.0 ficytC_c + h_c --> C00828_c + 2.0 focytc_c + 3.0 h_e	BSU22540 and BSU22550 and BSU22560	['BSU22560 and BSU22550 and BSU22540']	BSU22540 and BSU22550 and BSU22560
Same	SERH	Tryptophan synthase alpha chain (EC 4.2.1.20);Tryptophan synthase beta chain (EC 4.2.1.20)(BSU22640)	3ig3p_c + ser__L_c <=> g3p_c + h2o_c + trp__L_c	BSU22630 and BSU22640	['BSU22630 and BSU22640 and BSU22640 and BSU22630']	BSU22630 and BSU22640
Same	TRPS2	Tryptophan synthase alpha chain (EC 4.2.1.20);Tryptophan synthase beta chain (EC 4.2.1.20)(BSU22640)	indole_c + ser__L_c <=> h2o_c + trp__L_c	BSU22630 and BSU22640	['BSU22630 and BSU22640']	BSU22630 and BSU22640
Same	TRPS3	Tryptophan synthase alpha chain (EC 4.2.1.20);Tryptophan synthase beta chain (EC 4.2.1.20)(BSU22640)	3ig3p_c <=> g3p_c + indole_c	BSU22630 and BSU22640	['BSU22630 and BSU22640']	BSU22630 and BSU22640
Same	GGPS_1	Heptaprenyl diphosphate synthase component II (EC 2.5.1.30);Heptaprenyl diphosphate synthase component I (EC 2.5.1.30)(BSU22760)	frdp_c + ipdp_c --> ggdp_c + ppi_c	BSU22740 and BSU22760	['BSU22760 and BSU22740']	BSU22740 and BSU22760
Same	HEXTT	Heptaprenyl diphosphate synthase component II (EC 2.5.1.30);Heptaprenyl diphosphate synthase component I (EC 2.5.1.30)(BSU22760)	hexdp_c + ipdp_c --> hepdp_c + ppi_c	BSU22740 and BSU22760	['BSU22760 and BSU22740']	BSU22740 and BSU22760
Same	PPTTm	Heptaprenyl diphosphate synthase component II (EC 2.5.1.30);Heptaprenyl diphosphate synthase component I (EC 2.5.1.30)(BSU22760)	ipdp_c + pendp_c --> hexdp_c + ppi_c	BSU22740 and BSU22760	['BSU22760 and BSU22740']	BSU22740 and BSU22760
Same	GGTT	Heptaprenyl diphosphate synthase component II (EC 2.5.1.30);Heptaprenyl diphosphate synthase component I (EC 2.5.1.30)(BSU22760)	ggdp_c + ipdp_c --> pendp_c + ppi_c	BSU22740 and BSU22760	['BSU22760 and BSU22740']	BSU22740 and BSU22760
Same	MOD	Branched-chain alpha-keto acid dehydrogenase, E1 component, beta subunit (EC 1.2.4.4);Branched-chain alpha-keto acid dehydrogenase, E1 component, alpha subunit (EC 1.2.4.4)(BSU24050)	3mob_c + h_c + thmpp_c --> 2mhop_c + co2_c	BSU24040 and BSU24050	['BSU24050 and BSU24040']	BSU24040 and BSU24050
Same	R07600	Branched-chain alpha-keto acid dehydrogenase, E1 component, beta subunit (EC 1.2.4.4);Branched-chain alpha-keto acid dehydrogenase, E1 component, alpha subunit (EC 1.2.4.4)(BSU24050)	2mhop_c + lpam_c <=> 2mpdhl_c + thmpp_c	BSU24040 and BSU24050	['BSU24050 and BSU24040']	BSU24040 and BSU24050
Same	MOD_4mop	Branched-chain alpha-keto acid dehydrogenase, E1 component, beta subunit (EC 1.2.4.4);Branched-chain alpha-keto acid dehydrogenase, E1 component, alpha subunit (EC 1.2.4.4)(BSU24050)	4mop_c + h_c + thmpp_c --> 3mhtpp_c + co2_c	BSU24040 and BSU24050	['BSU24050 and BSU24040']	BSU24040 and BSU24050
Same	R07602	Branched-chain alpha-keto acid dehydrogenase, E1 component, beta subunit (EC 1.2.4.4);Branched-chain alpha-keto acid dehydrogenase, E1 component, alpha subunit (EC 1.2.4.4)(BSU24050)	3mhtpp_c + lpam_c <=> 3mbdhl_c + thmpp_c	BSU24040 and BSU24050	['BSU24050 and BSU24040']	BSU24040 and BSU24050
Same	MOD_3mop	Branched-chain alpha-keto acid dehydrogenase, E1 component, beta subunit (EC 1.2.4.4);Branched-chain alpha-keto acid dehydrogenase, E1 component, alpha subunit (EC 1.2.4.4)(BSU24050)	3mop_c + h_c + thmpp_c --> 2mhob_c + co2_c	BSU24040 and BSU24050	['BSU24050 and BSU24040']	BSU24040 and BSU24050
Same	R07604	Branched-chain alpha-keto acid dehydrogenase, E1 component, beta subunit (EC 1.2.4.4);Branched-chain alpha-keto acid dehydrogenase, E1 component, alpha subunit (EC 1.2.4.4)(BSU24050)	2mhob_c + lpam_c <=> 2mbdhl_c + thmpp_c	BSU24040 and BSU24050	['BSU24050 and BSU24040']	BSU24040 and BSU24050
Same	GLYTLm	Glycyl-tRNA synthetase beta chain (EC 6.1.1.14);Glycyl-tRNA synthetase alpha chain (EC 6.1.1.14)(BSU25270)	atp_c + gly_c + trnagly_c --> amp_c + glytrna_c + ppi_c	BSU25260 and BSU25270	['BSU25270 and BSU25260']	BSU25260 and BSU25270
Same	IPPMIa	3-isopropylmalate dehydratase small subunit (EC 4.2.1.33);3-isopropylmalate dehydratase large subunit (EC 4.2.1.33)(BSU28260)	3c2hmp_c <=> 2ippm_c + h2o_c	BSU28250 and BSU28260	['BSU28260 and BSU28250']	( BSU28250 and BSU28260 )
Same	ACAS_2ahbut	Acetolactate synthase small subunit (EC 2.2.1.6);Acetolactate synthase large subunit (EC 2.2.1.6)(BSU28310)	2ahethmpp_c + 2obut_c <=> 2ahbut_c + thmpp_c	BSU28300 and BSU28310	['BSU28310 and BSU28300']	BSU28300 and BSU28310
Same	SUCD1	Succinate dehydrogenase iron-sulfur protein (EC 1.3.99.1);Succinate dehydrogenase flavoprotein subunit (EC 1.3.99.1)(BSU28440);Succinate dehydrogenase cytochrome b558 subunit(BSU28450)	fad_c + succ_c <=> fadh2_c + fum_c	BSU28430 and BSU28440 and BSU28450	['BSU28440 and BSU28430 and BSU28450']	BSU28430 and BSU28440 and BSU28450
Same	PHETRS	Phenylalanyl-tRNA synthetase beta chain (EC 6.1.1.20);Phenylalanyl-tRNA synthetase alpha chain (EC 6.1.1.20)(BSU28640)	atp_c + phe__L_c + trnaphe_c --> amp_c + phetrna_c + ppi_c	BSU28630 and BSU28640	['BSU28640 and BSU28630']	BSU28630 and BSU28640
Same	ACCOAC_1	Acetyl-coenzyme A carboxyl transferase alpha chain (EC 6.4.1.2);Acetyl-coenzyme A carboxyl transferase beta chain (EC 6.4.1.2)(BSU29210)	accoa_c + cbtnCCP_c <=> btnCCP_c + malcoa_c	BSU29210 and BSU29200	['BSU29200 and BSU29210']	BSU29210 and BSU29200
Same	NAt3_1	Na(+) H(+) antiporter subunit E (TC 2.A.63.1.2);Na(+) H(+) antiporter subunit A (TC 2.A.63.1.2)(BSU31600);Na(+) H(+) antiporter subunit B (TC 2.A.63.1.2)(BSU31610);Na(+) H(+) antiporter subunit C (TC 2.A.63.1.2)(BSU31620);Na(+) H(+) antiporter subunit D (TC 2.A.63.1.2)(BSU31630);Na(+) H(+) antiporter subunit F (TC 2.A.63.1.2)(BSU31650);Na(+) H(+) antiporter subunit G (TC 2.A.63.1.2)(BSU31660)	h_c + na1_e <=> h_e + na1_c	BSU31600 and BSU31610 and BSU31620 and BSU31630 and BSU31640 and BSU31650 and BSU31660	['BSU31600 and BSU31610 and BSU31620 and BSU31630 and BSU31640 and BSU31650 and BSU31660']	BSU31600 and BSU31610 and BSU31620 and BSU31630 and BSU31640 and BSU31650 and BSU31660
Same	SULR	Sulfite reductase [NADPH] hemoprotein beta-component (EC 1.8.1.2);Sulfite reductase [NADPH] flavoprotein alpha-component (EC 1.8.1.2)(BSU33440)	4.0 h_c + 3.0 nadph_c + so3_c --> 3.0 h2o_c + h2s_c + 3.0 nadp_c	BSU33430 and BSU33440	['BSU33430 and BSU33440']	BSU33430 and BSU33440
Same	CRNabc	Osmotically activated L-carnitine/choline ABC transporter, permease protein OpuCD;Osmotically activated L-carnitine/choline ABC transporter, substrate-binding protein OpuCC(BSU33810);Osmotically activated L-carnitine/choline ABC transporter, permease protein OpuCB(BSU33820);Osmotically activated L-carnitine/choline ABC transporter, ATP-binding protein OpuCA(BSU33830)	atp_c + crn_e + h2o_c --> adp_c + crn_c + h_c + pi_c	BSU33800 and BSU33810 and BSU33820 and BSU33830	['BSU33830 and BSU33820 and BSU33810 and BSU33800']	BSU33800 and BSU33810 and BSU33820 and BSU33830
Same	ECTOINEabc	Osmotically activated L-carnitine/choline ABC transporter, permease protein OpuCD;Osmotically activated L-carnitine/choline ABC transporter, substrate-binding protein OpuCC(BSU33810);Osmotically activated L-carnitine/choline ABC transporter, permease protein OpuCB(BSU33820);Osmotically activated L-carnitine/choline ABC transporter, ATP-binding protein OpuCA(BSU33830)	atp_c + ectoine_e + h2o_c --> adp_c + ectoine_c + h_c + pi_c	BSU33800 and BSU33810 and BSU33820 and BSU33830	['BSU33830 and BSU33820 and BSU33810 and BSU33800']	BSU33800 and BSU33810 and BSU33820 and BSU33830
Same	IG3PS	Imidazole glycerol phosphate synthase cyclase subunit (EC 4.1.3.-);Imidazole glycerol phosphate synthase amidotransferase subunit (EC 2.4.2.-)(BSU34890)	gln__L_c + prlp_c --> aicar_c + eig3p_c + glu__L_c + h_c	BSU34870 and BSU34890	['BSU34870 and BSU34890']	BSU34870 and BSU34890
Same	rxn10194	Teichoic acid export ATP-binding protein TagH (EC 3.6.3.40);Teichoic acid translocation permease protein TagG(BSU35710)	cpd15666_c + prenoN_acid_c <=> cpd15667_c + udcpp_w_c	BSU35700 and BSU35710	['BSU35710 and BSU35700']	BSU35700 and BSU35710
Same	rxn10195	Teichoic acid export ATP-binding protein TagH (EC 3.6.3.40);Teichoic acid translocation permease protein TagG(BSU35710)	cpd15666_c + prenoN_ated_c <=> cpd15669_c + udcpp_w_c	BSU35700 and BSU35710	['BSU35710 and BSU35700']	BSU35700 and BSU35710
Same	rxn10196	Teichoic acid export ATP-binding protein TagH (EC 3.6.3.40);Teichoic acid translocation permease protein TagG(BSU35710)	cpd15663_c + cpd15666_c <=> cpd15668_c + udcpp_w_c	BSU35700 and BSU35710	['BSU35710 and BSU35700']	BSU35700 and BSU35710
Same	UREA	Urease alpha subunit (EC 3.5.1.5);Urease beta subunit (EC 3.5.1.5)(BSU36650);Urease gamma subunit (EC 3.5.1.5)(BSU36660)	h2o_c + 2.0 h_c + urea_c --> co2_c + 2.0 nh4_c	BSU36640 and BSU36650 and BSU36660	['BSU36660 and BSU36650 and BSU36640']	BSU36640 and BSU36650 and BSU36660
Same	CYTB_B3	AA3-600 quinol oxidase subunit IV;AA3-600 quinol oxidase subunit IIII(BSU38150);AA3-600 quinol oxidase subunit I(BSU38160);AA3-600 quinol oxidase subunit II(BSU38170)	4.0 h_c + 0.5 o2_c --> C00828_c + h2o_c + 4.0 h_e	BSU38140 and BSU38150 and BSU38160 and BSU38170	['BSU38170 and BSU38160 and BSU38150 and BSU38140']	BSU38140 and BSU38150 and BSU38160 and BSU38170
Same	OCOAT1	Butyrate-acetoacetate CoA-transferase subunit B (EC 2.8.3.9);Butyrate-acetoacetate CoA-transferase subunit A (EC 2.8.3.9)(BSU38990)	acac_c + succoa_c <=> aacoa_c + succ_c	BSU38980 and BSU38990	['BSU38990 and BSU38980']	BSU38980 and BSU38990
Same	R01365	Butyrate-acetoacetate CoA-transferase subunit B (EC 2.8.3.9);Butyrate-acetoacetate CoA-transferase subunit A (EC 2.8.3.9)(BSU38990)	acac_c + btcoa_c <=> C00246_c + aacoa_c	BSU38980 and BSU38990	['BSU38990 and BSU38980']	BSU38980 and BSU38990
Manual extend (GPRuler correct)	26DPAi	Dipicolinate synthase subunit A (EC 4.2.1.52);Dipicolinate synthase subunit B(BSU16740)	23dhdp_c + nad_c <=> DPA_c + h_c + nadh_c	BSU16730 or BSU16740	['BSU16730 and BSU16740']	BSU16730 and BSU16740	SpoVFA (BSU16730) is a dipicolinate synthase subunit A; SpoVFB (BSU16740) is a dipicolinate synthase subunit B.	https://www.genome.jp/brite/bsu00001+BSU16730+BSU16740
Manual extend (GPRuler correct)	RBFSb	Riboflavin synthase alpha chain (EC 2.5.1.9);riboflavin biosynthesis(BSU23240)	2.0 dmlz_c --> 4r5au_c + ribflv_c	BSU23270 or BSU23240	['BSU23270']	BSU23270	RibT (BSU23240) is not involved in the last step of the riboflavin synthesis reaction.	https://legacy.uniprot.org/uniprot/P16440;https://legacy.uniprot.org/uniprot/P17622
Manual extend (GPRuler correct)	IPPMIb	3-isopropylmalate dehydratase small subunit (EC 4.2.1.33);3-isopropylmalate dehydratase large subunit (EC 4.2.1.33)(BSU28260)	3c3hmp_c <=> 2ippm_c + h2o_c	BSU28260 or BSU28250	['BSU28260 and BSU28250']	BSU28260 and BSU28250	Heterodimer of LeuC(BSU28260) and LeuD(BSU28250).	https://legacy.uniprot.org/uniprot/P80858;https://legacy.uniprot.org/uniprot/P94568;
Manual extend (Neither is correct)	GLMS_syn	Ferredoxin-dependent glutamate synthase (EC 1.4.7.1)	fdxox_c + 2.0 glu__L_c <=> akg_c + fdxrd_c + gln__L_c + 2.0 h_c	BSU06590	['BSU18450 and BSU18440 and BSU06590']	delete reaction	In UniProt and KEGG, we can not find any gene which is responsible for Glutamate synthase (Ferredoxin) transport in Bacillus subtilis (strain 168).	https://legacy.uniprot.org/uniprot/P39812;
Manual extend (Neither is correct)	PDHbr	Dihydrolipoamide acetyltransferase component of pyruvate dehydrogenase complex (EC 2.3.1.12)	accoa_c + dhlam_c <=> adhlam_c + coa_c	BSU14600	['BSU08080 and BSU14600']	delete reaction	This reaction is part of the pyruvate dehydrogenase, we added reaction 'PDH' to achieve direct conversion of 'pyr' to 'accoa' just like iML1515, therefore we removed this reaction
DiffeManual extendrent (Neither is correct)	R07618	Dihydrolipoamide dehydrogenase of pyruvate dehydrogenase complex (EC 1.8.1.4);Dihydrolipoamide dehydrogenase of branched-chain alpha-keto acid dehydrogenase (EC 1.8.1.4)(BSU24060)	dhlam_c + nad_c <=> h_c + lpam_c + nadh_c	BSU14610 or BSU24060	['BSU08090 and BSU24060 and BSU14610']	delete reaction	This reaction is part of the pyruvate dehydrogenase, we added reaction 'PDH' to achieve direct conversion of 'pyr' to 'accoa' just like iML1515, therefore we removed this reaction
Manual extend (Neither is correct)	PDH	Complex that carries out the oxidative decarboxylation of pyruvate to form acetyl-CoA	coa_c + nad_c + pyr_c ⇌ accoa_c + co2_c + nadh_c			BSU14580 and BSU14590 and BSU14600 and BSU14610	Complex that carries out the oxidative decarboxylation of pyruvate to form acetyl-CoA; comprises subunits possessing three catalytic activities: pyruvate dehydrogenase (E1), dihydrolipoamide S-acetyltransferase (E2), and dihydrolipoamide dehydrogenase (E3). E1:PdhA(BUS14580) is Pyruvate dehydrogenase E1 component subunit alpha; PdhB(BSU14590) is Pyruvate dehydrogenase E1 component subunit beta. E…	https://biocyc.org/BSUB/NEW-IMAGE?object=GO:0045254 ; https://legacy.uniprot.org/uniprot/P21883; https://legacy.uniprot.org/uniprot/P21881; https://legacy.uniprot.org/uniprot/P21882; https://legacy.uniprot.org/uniprot/P21880
Manual extend (Neither is correct)	PPCOAC	Acetyl-coenzyme A carboxyl transferase alpha chain (EC 6.4.1.2)|Acetyl-coenzyme A carboxyl transferase beta chain (EC 6.4.1.2)|Propionyl-CoA carboxylase beta chain (EC 6.4.1.3)	atp_c + hco3_c + ppcoa_c --> adp_c + h_c + mmcoa__S_c + pi_c	BSU23920	['BSU23920']	BSU23920 and BSU24340	BSU23920 is a putative propionyl-CoA carboxylase beta chain; We found Propionyl-CoA carboxylase alpha chain (SPO1101) in Ruegeria pomeroyi (strain ATCC 700808 / DSM 15171 / DSS-3) (Silicibacter pomeroyi), has 50% similarity with BSU24340.	https://legacy.uniprot.org/uniprot/P54541;https://legacy.uniprot.org/uniprot/P49787;
Manual extend (Neither is correct)	GSNabc	guanosine ABC transporter	atp_c + gsn_e + h2o_c --> adp_c + gsn_c + h_c + pi_c			BSU31540 and BSU31550 and BSU31560 and BSU31570	BSU31540 and BSU31550 and BSU31560 and BSU31570 form an ABC transporter complex involved in the uptake of guanosine, which is composed of two ATP-binding proteins (NupO-BSU31550), two transmembrane proteins (NupP-BSU31560 and NupQ-BSU31570) and a solute-binding protein (NupN-BSU31540)	https://legacy.uniprot.org/uniprot/O05255; https://legacy.uniprot.org/uniprot/O05253; https://legacy.uniprot.org/uniprot/O05254; https://legacy.uniprot.org/uniprot/O05255
Manual extend (Neither is correct)	r0163	2-oxoglutarate dehydrogenase E1 component (EC 1.2.4.2)	akg_c + h_c + thmpp_c --> HC01435_c + co2_c	BSU19370	['BSU19370']	delete reaction	This reaction is part of the 2-oxoglutarate dehydrogenase, we added reaction 'AKGDH' to achieve direct conversion of 'akg' to 'succoa' just like iML1515, therefore we removed this reaction
Manual extend (Neither is correct)	AKGDb	Dihydrolipoamide succinyltransferase component (E2) of 2-oxoglutarate dehydrogenase complex (EC 2.3.1.61)	dhlam_c + succoa_c <=> coa_c + sdhlam_c	BSU19360	['BSU19360']	delete reaction	This reaction is part of the 2-oxoglutarate dehydrogenase, we added reaction 'AKGDH' to achieve direct conversion of 'akg' to 'succoa' just like iML1515, therefore we removed this reaction
Manual extend (Neither is correct)	R03316	2-oxoglutarate dehydrogenase E1 component (EC 1.2.4.2)	HC01435_c + lpam_c <=> sdhlam_c + thmpp_c	BSU19370	['BSU19370']	delete reaction	This reaction is part of the 2-oxoglutarate dehydrogenase, we added reaction 'AKGDH' to achieve direct conversion of 'akg' to 'succoa' just like iML1515, therefore we removed this reaction
Manual extend (Neither is correct)	AKGDH	2-oxoglutarate dehydrogenase complex	akg_c + coa_c + nad_c --> co2_c + nadh_c + succoa_c			(BSU19360 and BSU19370 and BSU14610)	the 2-oxoglutarate dehydrogenase (OGDH) complex composed of E1 (2-oxoglutarate dehydrogenase), E2 (dihydrolipoamide succinyltransferase) and E3 (dihydrolipoamide dehydrogenase);E1:OdhA(BSU19370) is Pyruvate dehydrogenase E1 component subunit alpha; PdhB(BSU14590) is Pyruvate dehydrogenase E1 component subunit beta. E2:OdhB(BSU19360) is Dihydrolipoyllysine-residue acetyltransferase component of py…	https://legacy.uniprot.org/uniprot/P16263; https://legacy.uniprot.org/uniprot/P23129; https://legacy.uniprot.org/uniprot/P21880
Manual extend (Neither is correct)	FCLT	Deferrochelatase	fe2_c + ppp9_c <=> 2.0 h_c + pheme_c	BSU10130		BSU38260	Involved in the recovery of exogenous heme iron. Extracts iron from heme while preserving the protoporphyrin ring intact	https://www.uniprot.org/uniprotkb/P3959
Manual extend (Neither is correct)	FCLT3	Coproporphyrin III ferrochelatase	fe2_c + cpppg3_c <=> fecpp3 + 2h_c			BSU10130	new reaction,Add metabolite(Fe-coproporphyrin III|fecpp3),bound(0,1000)	https://www.uniprot.org/uniprotkb/P32396
Manual extend (Neither is correct)	ALPHNH	Allophanate hydrolase subunit 1 (EC 3.5.1.54)|Allophanate hydrolase subunit 2 (EC 3.5.1.54)	allphn_c + h2o_c + 3.0 h_c --> 2.0 co2_c + 2.0 nh4_c	BSU04080	['BSU04050 and BSU04080 and BSU04090']	delete reaction	In UniProt and KEGG, we can not find any gene which is responsible for hydrolysis of urea in Bacillus subtilis (strain 168).These genes are part of a 5-oxoprolinase complex composed of PxpA(BSU04050), PxpB(BSU04080), and PxpC(BSU04090).	https://legacy.uniprot.org/uniprot/P60495;https://legacy.uniprot.org/uniprot/Q7WY77;https://legacy.uniprot.org/uniprot/P42963;

## Sheet: Table S4
Tables S4. GPR modifications based on homology.
ID	Name	Reaction equation	GPR in model	Gene combination	Blastp indentity	GPR_updated	Reasons	Evidence
GLGC	Glucose-1-phosphate adenylyltransferase (EC 2.7.7.27);Glycogen biosynthesis protein GlgD, glucose-1-phosphate adenylyltransferase family(BSU30960)	atp_c + g1p_c --> adpglc_c + ppi_c	BSU30960 and BSU30970	['BSU30960/BSU30970']	[25.753]	BSU30960 and BSU30970	We found BSU30960 is glucose-1-phosphate adenylyltransferase bata subunit,and BSU30970 is glucose-1-phosphate adenylyltransferase alpha subunit, the GPR relationship for GLGC should be 'BSU30970 and BSU30960'.	https://www.biocyc.org/gene?orgid=BSUB&id=BSU30960;https://www.biocyc.org/gene?orgid=BSUB&id=BSU30970
rxn10192	CDP-glycerol:poly(glycerophosphate) glycerophosphotransferase (EC 2.7.8.12);CDP-glycerol: N-acetyl-beta-D-mannosaminyl-1,4-N-acetyl-D-glucosaminyldiphosphoundecaprenyl glycerophosphotransferase(BSU35760)	abdmagdpu_c + 45.0 cdpglyc_c <=> 45.0 cmp_c + prenoN_acid_c	BSU35760 and BSU35720	['BSU35760/BSU35720']	[26.776]	BSU35760 and BSU35720	BSU35720(TagF) shares considerable sequence similarity with BSU35760(TagB), and we found BSU35760 is responsible for priming the disaccharide of the linkage unit with the first glycerol-phosphate unit, while BSU35720 is responsible for the addition of 30-40 additional glycerol-phosphate units to the chain.Therefore the correct GPR relationship for rxn10192 should be 'BSU35720 and BSU35760'.	https://www.biocyc.org/gene?orgid=BSUB&id=BSU35720;https://www.biocyc.org/gene?orgid=BSUB&id=BSU35760
TRDR	Thioredoxin reductase (EC 1.8.1.9);thioredoxin reductase (NADPH)(BSU03270)	h_c + nadph_c + trdox_c <=> nadp_c + trdrd_c	( BSU34790 and BSU32110 ) or ( BSU03270 and BSU32110 )	['BSU34790/BSU32110'] or ['BSU03270/BSU32110']	[30.063] or [48.78]	BSU34790	BSU34790 is thioredoxin reductase (NADPH),which is responsible for this reaction. BSU32110 and BSU03270 is ferredoxin/flavodoxin---NADP+ reductase	https://www.kegg.jp/entry/bsu:BSU03270;https://www.kegg.jp/entry/bsu:BSU32110;https://www.kegg.jp/entry/bsu:BSU34790
ALAR	Alanine racemase (EC 5.1.1.1);Alanine racemase 2 (EC 5.1.1.1)(BSU17640)	ala__L_c <=> ala__D_c	( BSU04640 and BSU17640 ) or BSU04640	['BSU04640/BSU17640']	[41.645]	BSU04640 or BSU17640	The GPR relationship for Alanine racemase (ALAR) is ( BSU04640 and BSU17640 ) or BSU04640. BSU04640 and BSU17640 has 41.6% sequence similarity. By further searching the BioCyc database for verification, we found that the protein encoded by BSU04640 is a D-alanine racemase, whereas the protein encoded by BSU17640 is a calanine racemase (minor activity). They are two isoenzymes and therefore the co…	https://www.biocyc.org/gene?orgid=BSUB&id=BSU04640;https://www.biocyc.org/gene?orgid=BSUB&id=BSU17640
URATEtm	Xanthine permease	h_e + urate_e <=> h_c + urate_c	( BSU32430 and BSU32440 )	['BSU32430/BSU32440']	[55.035]	BSU32430 or BSU32440	Blast revealed they have similar amino acid sequence. BSU32430 and BSU32440 have the same function as uric acid permease,and mapping the same EC code. Therefore the GPR relationship for URATEtm should be 'BSU32430 or BSU32440'.	https://www.biocyc.org/gene?orgid=BSUB&id=BSU32430;https://www.biocyc.org/gene?orgid=BSUB&id=BSU32440
HXANt2r	Xanthine/uracil/thiamine/ascorbate permease family protein;xanthine permease(BSU22060);Xanthine permease(BSU32430);Xanthine permease(BSU32440);Xanthine permease(BSU37940)	h_e + hxan_e <=> h_c + hxan_c	( BSU32430 and BSU32440 ) or BSU29990 or BSU06370 or BSU22060 or BSU37940	['BSU32430/BSU32440']	[55.035]	BSU22060	BSU22060 pbuX is xanthine permease, which is responsible for this reaction.BSU32430 and BSU32440 are uric acid permease,BSU06370 and BSU29990 are guanine/hypoxanthine permease,BSU37940 is purine permease YwdJ	https://www.kegg.jp/entry/bsu:BSU32430;https://www.kegg.jp/entry/bsu:BSU32440;https://www.kegg.jp/entry/bsu:BSU22060;https://www.kegg.jp/entry/bsu:BSU06370;https://www.kegg.jp/entry/bsu:BSU29990;https://www.kegg.jp/entry/bsu:BSU37940
XANt2	Xanthine/uracil/thiamine/ascorbate permease family protein;xanthine permease(BSU22060);Xanthine permease(BSU32430);Xanthine permease(BSU32440);Xanthine permease(BSU37940)	h_e + xan_e <=> h_c + xan_c	( BSU32430 and BSU32440 ) or BSU22060 or BSU06370 or BSU29990 or BSU37940	['BSU32430/BSU32440']	[55.035]	BSU22060	BSU22060 pbuX is xanthine permease, which is responsible for this reaction.BSU32430 and BSU32440 are uric acid permease,BSU06370 and BSU29990 are guanine/hypoxanthine permease,BSU37940 is purine permease YwdJ	https://www.kegg.jp/entry/bsu:BSU32430;https://www.kegg.jp/entry/bsu:BSU32440;https://www.kegg.jp/entry/bsu:BSU22060;https://www.kegg.jp/entry/bsu:BSU06370;https://www.kegg.jp/entry/bsu:BSU29990;https://www.kegg.jp/entry/bsu:BSU37940
METS_1	Methionine synthase II (cobalamin-independent)	5mthf_c + hcys__L_c <=> met__L_c + thf_c	( BSU38950 and BSU38960 ) or BSU13180	['BSU38950/BSU38960']	[73.545]	BSU13180	BSU13180 is 5-methyltetrahydropteroyltriglutamate--homocysteine methyltransferase, which is responsible for this reaction. BSU38950 and BSU38960 are hypothetical protein.	https://www.kegg.jp/entry/bsu:BSU38950;https://www.kegg.jp/entry/bsu:BSU38960
BTS	NADH-dependent butanol dehydrogenase B (EC 1.1.1.-);NADH-dependent butanol dehydrogenase A (EC 1.1.1.-)(BSU31370)	btal_c + h_c + nadh_c <=> 1btol_c + nad_c	BSU31360 and BSU31370	['BSU31360/BSU31370']	[73.846]	BSU31360 or BSU31370	The GPR relationship for NADH-dependent butanol dehydrogenase (BTS) is 'BSU31360 and BSU31370', which has 74% sequence similarity. By further searching the BioCyc database for verification, we found that the protein encoded by BSU31370 is a bifunctional enzyme that catalyzes two reactions (including butanol dehydrogen-ase), whereas the protein encoded by BSU31360 catalyzes only the butanol dehydr…	https://www.biocyc.org/gene?orgid=BSUB&id=BSU31360;https://www.biocyc.org/gene?orgid=BSUB&id=BSU31370
D5KGK	5-keto-2-deoxygluconokinase (EC 2.7.1.92);5-keto-2-deoxygluconokinase B (EC 2.7.1.92)(BSU39750)	atp_c + d5kg_c --> adp_c + d5kgp_c	BSU39740 and BSU39750	['BSU39740/BSU39750']	['NA']
G3PAT160_1	Phosphate:acyl-ACP acyltransferase PlsX;Acyl-phosphate:glycerol-3-phosphate O-acyltransferase PlsY(BSU18070)	glyc3p_c + pmtcoa_c --> 1hdecg3p_c + coa_c	BSU15890 and BSU18070	['BSU15890/BSU18070']	['NA']
rxn10203	Phosphate:acyl-ACP acyltransferase PlsX;Acyl-phosphate:glycerol-3-phosphate O-acyltransferase PlsY(BSU18070)	glyc3p_c + tdcoa_c --> 1tdecg3p_c + coa_c	BSU15890 and BSU18070	['BSU15890/BSU18070']	['NA']
rxn10204	Phosphate:acyl-ACP acyltransferase PlsX;Acyl-phosphate:glycerol-3-phosphate O-acyltransferase PlsY(BSU18070)	glyc3p_c + strcoa_c --> 1odecg3p_c + coa_c	BSU15890 and BSU18070	['BSU15890/BSU18070']	['NA']
rxn10205	Phosphate:acyl-ACP acyltransferase PlsX;Acyl-phosphate:glycerol-3-phosphate O-acyltransferase PlsY(BSU18070)	fa11coa_c + glyc3p_c --> coa_c + cpd15671_c	BSU15890 and BSU18070	['BSU15890/BSU18070']	['NA']
rxn10206	Phosphate:acyl-ACP acyltransferase PlsX;Acyl-phosphate:glycerol-3-phosphate O-acyltransferase PlsY(BSU18070)	fa12coa_c + glyc3p_c --> coa_c + cpd15672_c	BSU15890 and BSU18070	['BSU15890/BSU18070']	['NA']
rxn10207	Phosphate:acyl-ACP acyltransferase PlsX;Acyl-phosphate:glycerol-3-phosphate O-acyltransferase PlsY(BSU18070)	fa1coa_c + glyc3p_c --> coa_c + cpd15673_c	BSU15890 and BSU18070	['BSU15890/BSU18070']	['NA']
rxn10208	Phosphate:acyl-ACP acyltransferase PlsX;Acyl-phosphate:glycerol-3-phosphate O-acyltransferase PlsY(BSU18070)	fa3coa_c + glyc3p_c --> coa_c + cpd15674_c	BSU15890 and BSU18070	['BSU15890/BSU18070']	['NA']
rxn10209	Phosphate:acyl-ACP acyltransferase PlsX;Acyl-phosphate:glycerol-3-phosphate O-acyltransferase PlsY(BSU18070)	fa4coa_c + glyc3p_c --> coa_c + cpd15675_c	BSU15890 and BSU18070	['BSU15890/BSU18070']	['NA']
rxn10210	Phosphate:acyl-ACP acyltransferase PlsX;Acyl-phosphate:glycerol-3-phosphate O-acyltransferase PlsY(BSU18070)	fa6coa_c + glyc3p_c --> coa_c + cpd15676_c	BSU15890 and BSU18070	['BSU15890/BSU18070']	['NA']
rxn05229	Phosphoribosylaminoimidazole carboxylase catalytic subunit (EC 4.1.1.21);Phosphoribosylaminoimidazole carboxylase ATPase subunit (EC 4.1.1.21)(BSU06430)	airs_c + atp_c + hco3_c --> 5aizc_c + adp_c + h_c + pi_c	BSU06420 and BSU06430	['BSU06420/BSU06430']	['NA']
R01625	Holo-[acyl-carrier protein] synthase (EC 2.7.8.7);Acyl carrier protein(BSU15920)	C03688_c + coa_c <=> ACP_c + pap_c	BSU04620 and BSU15920	['BSU04620/BSU15920']	['NA']
Kt2r	potassium uptake;Potassium uptake protein, integral membrane component, KtrD(BSU13500);Trk system potassium uptake protein trkA(BSU14510);Potassium uptake protein, integral membrane component, KtrA(BSU31090);Potassium uptake protein, integral membrane component, KtrB(BSU31100)	h_e + k_e --> h_c + k_c	( BSU13500 and BSU14510 ) or ( BSU31090 and BSU31100 )	['BSU13500/BSU14510'] or ['BSU31090/BSU31100']	['NA'] or ['NA']
ACOATA	3-oxoacyl-[acyl-carrier-protein] synthase III (EC 2.3.1.41);3-oxoacyl-[acyl-carrier-protein] synthase, KASIII (EC 2.3.1.41)(BSU11330);3-oxoacyl-[acyl-carrier-protein] synthase, KASII (EC 2.3.1.41)(BSU11340)	ACP_c + accoa_c <=> acACP_c + coa_c	( BSU11330 and BSU11340 ) or ( BSU10170 and BSU11340 )	['BSU11330/BSU11340'] or ['BSU10170/BSU11340']	['NA'] or ['NA']
KAS14_1	3-oxoacyl-[acyl-carrier-protein] synthase III (EC 2.3.1.41);3-oxoacyl-[acyl-carrier-protein] synthase, KASIII (EC 2.3.1.41)(BSU11330);3-oxoacyl-[acyl-carrier-protein] synthase, KASII (EC 2.3.1.41)(BSU11340)	acACP_c + h_c + malACP_c --> ACP_c + actACP_c + co2_c	( BSU11330 and BSU11340 ) or ( BSU10170 and BSU11340 )	['BSU11330/BSU11340'] or ['BSU10170/BSU11340']	['NA'] or ['NA']
MCMAT6	3-oxoacyl-[acyl-carrier-protein] synthase III (EC 2.3.1.41);3-oxoacyl-[acyl-carrier-protein] synthase, KASIII (EC 2.3.1.41)(BSU11330);3-oxoacyl-[acyl-carrier-protein] synthase, KASII (EC 2.3.1.41)(BSU11340)	ddeacp_c + h_c + malACP_c --> 3omrsACP_c + ACP_c + co2_c	( BSU11330 and BSU11340 ) or ( BSU10170 and BSU11340 )	['BSU11330/BSU11340'] or ['BSU10170/BSU11340']	['NA'] or ['NA']
3OAS60	3-oxoacyl-[acyl-carrier-protein] synthase III (EC 2.3.1.41);3-oxoacyl-[acyl-carrier-protein] synthase, KASIII (EC 2.3.1.41)(BSU11330);3-oxoacyl-[acyl-carrier-protein] synthase, KASII (EC 2.3.1.41)(BSU11340)	butACP_c + h_c + malACP_c --> 3ohexACP_c + ACP_c + co2_c	( BSU11330 and BSU11340 ) or ( BSU10170 and BSU11340 )	['BSU11330/BSU11340'] or ['BSU10170/BSU11340']	['NA'] or ['NA']
3OAS80	3-oxoacyl-[acyl-carrier-protein] synthase III (EC 2.3.1.41);3-oxoacyl-[acyl-carrier-protein] synthase, KASIII (EC 2.3.1.41)(BSU11330);3-oxoacyl-[acyl-carrier-protein] synthase, KASII (EC 2.3.1.41)(BSU11340)	h_c + hexACP_c + malACP_c --> 3ooctACP_c + ACP_c + co2_c	( BSU11330 and BSU11340 ) or ( BSU10170 and BSU11340 )	['BSU11330/BSU11340'] or ['BSU10170/BSU11340']	['NA'] or ['NA']
3OAS100	3-oxoacyl-[acyl-carrier-protein] synthase III (EC 2.3.1.41);3-oxoacyl-[acyl-carrier-protein] synthase, KASIII (EC 2.3.1.41)(BSU11330);3-oxoacyl-[acyl-carrier-protein] synthase, KASII (EC 2.3.1.41)(BSU11340)	h_c + malACP_c + ocACP_c --> 3odecACP_c + ACP_c + co2_c	( BSU11330 and BSU11340 ) or ( BSU10170 and BSU11340 )	['BSU11330/BSU11340'] or ['BSU10170/BSU11340']	['NA'] or ['NA']
3OAS120	3-oxoacyl-[acyl-carrier-protein] synthase III (EC 2.3.1.41);3-oxoacyl-[acyl-carrier-protein] synthase, KASIII (EC 2.3.1.41)(BSU11330);3-oxoacyl-[acyl-carrier-protein] synthase, KASII (EC 2.3.1.41)(BSU11340)	dcaACP_c + h_c + malACP_c --> 3oddecACP_c + ACP_c + co2_c	( BSU11330 and BSU11340 ) or ( BSU10170 and BSU11340 )	['BSU11330/BSU11340'] or ['BSU10170/BSU11340']	['NA'] or ['NA']
R04968	3-oxoacyl-[acyl-carrier-protein] synthase III (EC 2.3.1.41);3-oxoacyl-[acyl-carrier-protein] synthase, KASIII (EC 2.3.1.41)(BSU11330);3-oxoacyl-[acyl-carrier-protein] synthase, KASII (EC 2.3.1.41)(BSU11340)	h_c + malACP_c + tetacp_c --> 3opalmACP_c + ACP_c + co2_c	( BSU11330 and BSU11340 ) or ( BSU10170 and BSU11340 )	['BSU11330/BSU11340'] or ['BSU10170/BSU11340']	['NA'] or ['NA']
rxn05359	3-oxoacyl-[acyl-carrier-protein] synthase III (EC 2.3.1.41);3-oxoacyl-[acyl-carrier-protein] synthase, KASIII (EC 2.3.1.41)(BSU11330);3-oxoacyl-[acyl-carrier-protein] synthase, KASII (EC 2.3.1.41)(BSU11340)	2mbutACP_c + h_c + malACP_c --> 4m3ohexACP_c + ACP_c + co2_c	( BSU11330 and BSU11340 ) or ( BSU10170 and BSU11340 )	['BSU11330/BSU11340'] or ['BSU10170/BSU11340']	['NA'] or ['NA']
rxn05363	3-oxoacyl-[acyl-carrier-protein] synthase III (EC 2.3.1.41);3-oxoacyl-[acyl-carrier-protein] synthase, KASIII (EC 2.3.1.41)(BSU11330);3-oxoacyl-[acyl-carrier-protein] synthase, KASII (EC 2.3.1.41)(BSU11340)	4methexACP_c + h_c + malACP_c --> 6m3oACP_c + ACP_c + co2_c	( BSU11330 and BSU11340 ) or ( BSU10170 and BSU11340 )	['BSU11330/BSU11340'] or ['BSU10170/BSU11340']	['NA'] or ['NA']
rxn05367	3-oxoacyl-[acyl-carrier-protein] synthase III (EC 2.3.1.41);3-oxoacyl-[acyl-carrier-protein] synthase, KASIII (EC 2.3.1.41)(BSU11330);3-oxoacyl-[acyl-carrier-protein] synthase, KASII (EC 2.3.1.41)(BSU11340)	6moACP_c + h_c + malACP_c --> 8m3odACP_c + ACP_c + co2_c	( BSU11330 and BSU11340 ) or ( BSU10170 and BSU11340 )	['BSU11330/BSU11340'] or ['BSU10170/BSU11340']	['NA'] or ['NA']
rxn05371	3-oxoacyl-[acyl-carrier-protein] synthase III (EC 2.3.1.41);3-oxoacyl-[acyl-carrier-protein] synthase, KASIII (EC 2.3.1.41)(BSU11330);3-oxoacyl-[acyl-carrier-protein] synthase, KASII (EC 2.3.1.41)(BSU11340)	8mdACP_c + h_c + malACP_c --> ACP_c + co2_c + cpd11508_c	( BSU11330 and BSU11340 ) or ( BSU10170 and BSU11340 )	['BSU11330/BSU11340'] or ['BSU10170/BSU11340']	['NA'] or ['NA']
rxn05375	3-oxoacyl-[acyl-carrier-protein] synthase III (EC 2.3.1.41);3-oxoacyl-[acyl-carrier-protein] synthase, KASIII (EC 2.3.1.41)(BSU11330);3-oxoacyl-[acyl-carrier-protein] synthase, KASII (EC 2.3.1.41)(BSU11340)	10mdACP_c + h_c + malACP_c --> 123oxtACP_c + ACP_c + co2_c	( BSU11330 and BSU11340 ) or ( BSU10170 and BSU11340 )	['BSU11330/BSU11340'] or ['BSU10170/BSU11340']	['NA'] or ['NA']
rxn05379	3-oxoacyl-[acyl-carrier-protein] synthase III (EC 2.3.1.41);3-oxoacyl-[acyl-carrier-protein] synthase, KASIII (EC 2.3.1.41)(BSU11330);3-oxoacyl-[acyl-carrier-protein] synthase, KASII (EC 2.3.1.41)(BSU11340)	cpd11515_c + h_c + malACP_c --> 14m3ohdACP_c + ACP_c + co2_c	( BSU11330 and BSU11340 ) or ( BSU10170 and BSU11340 )	['BSU11330/BSU11340'] or ['BSU10170/BSU11340']	['NA'] or ['NA']
rxn05384	3-oxoacyl-[acyl-carrier-protein] synthase III (EC 2.3.1.41);3-oxoacyl-[acyl-carrier-protein] synthase, KASIII (EC 2.3.1.41)(BSU11330);3-oxoacyl-[acyl-carrier-protein] synthase, KASII (EC 2.3.1.41)(BSU11340)	h_c + isovACP_c + malACP_c --> 5m3hhACP_c + ACP_c + co2_c	( BSU11330 and BSU11340 ) or ( BSU10170 and BSU11340 )	['BSU11330/BSU11340'] or ['BSU10170/BSU11340']	['NA'] or ['NA']
rxn05388	3-oxoacyl-[acyl-carrier-protein] synthase III (EC 2.3.1.41);3-oxoacyl-[acyl-carrier-protein] synthase, KASIII (EC 2.3.1.41)(BSU11330);3-oxoacyl-[acyl-carrier-protein] synthase, KASII (EC 2.3.1.41)(BSU11340)	3mehacp_c + h_c + malACP_c --> 7me3oxoacp_c + ACP_c + co2_c	( BSU11330 and BSU11340 ) or ( BSU10170 and BSU11340 )	['BSU11330/BSU11340'] or ['BSU10170/BSU11340']	['NA'] or ['NA']
rxn05392	3-oxoacyl-[acyl-carrier-protein] synthase III (EC 2.3.1.41);3-oxoacyl-[acyl-carrier-protein] synthase, KASIII (EC 2.3.1.41)(BSU11330);3-oxoacyl-[acyl-carrier-protein] synthase, KASII (EC 2.3.1.41)(BSU11340)	7moACP_c + h_c + malACP_c --> 9m3odACP_c + ACP_c + co2_c	( BSU11330 and BSU11340 ) or ( BSU10170 and BSU11340 )	['BSU11330/BSU11340'] or ['BSU10170/BSU11340']	['NA'] or ['NA']
rxn05396	3-oxoacyl-[acyl-carrier-protein] synthase III (EC 2.3.1.41);3-oxoacyl-[acyl-carrier-protein] synthase, KASIII (EC 2.3.1.41)(BSU11330);3-oxoacyl-[acyl-carrier-protein] synthase, KASII (EC 2.3.1.41)(BSU11340)	9mdACP_c + h_c + malACP_c --> 11m3odACP_c + ACP_c + co2_c	( BSU11330 and BSU11340 ) or ( BSU10170 and BSU11340 )	['BSU11330/BSU11340'] or ['BSU10170/BSU11340']	['NA'] or ['NA']
rxn05400	3-oxoacyl-[acyl-carrier-protein] synthase III (EC 2.3.1.41);3-oxoacyl-[acyl-carrier-protein] synthase, KASIII (EC 2.3.1.41)(BSU11330);3-oxoacyl-[acyl-carrier-protein] synthase, KASII (EC 2.3.1.41)(BSU11340)	11mdACP_c + h_c + malACP_c --> 13m3otdACP_c + ACP_c + co2_c	( BSU11330 and BSU11340 ) or ( BSU10170 and BSU11340 )	['BSU11330/BSU11340'] or ['BSU10170/BSU11340']	['NA'] or ['NA']
rxn05404	3-oxoacyl-[acyl-carrier-protein] synthase III (EC 2.3.1.41);3-oxoacyl-[acyl-carrier-protein] synthase, KASIII (EC 2.3.1.41)(BSU11330);3-oxoacyl-[acyl-carrier-protein] synthase, KASII (EC 2.3.1.41)(BSU11340)	13mtdACP_c + h_c + malACP_c --> 15m3ohdACP_c + ACP_c + co2_c	( BSU11330 and BSU11340 ) or ( BSU10170 and BSU11340 )	['BSU11330/BSU11340'] or ['BSU10170/BSU11340']	['NA'] or ['NA']
rxn05409	3-oxoacyl-[acyl-carrier-protein] synthase III (EC 2.3.1.41);3-oxoacyl-[acyl-carrier-protein] synthase, KASIII (EC 2.3.1.41)(BSU11330);3-oxoacyl-[acyl-carrier-protein] synthase, KASII (EC 2.3.1.41)(BSU11340)	h_c + isobutACP_c + malACP_c --> 4m3opACP_c + ACP_c + co2_c	( BSU11330 and BSU11340 ) or ( BSU10170 and BSU11340 )	['BSU11330/BSU11340'] or ['BSU10170/BSU11340']	['NA'] or ['NA']
rxn05413	3-oxoacyl-[acyl-carrier-protein] synthase III (EC 2.3.1.41);3-oxoacyl-[acyl-carrier-protein] synthase, KASIII (EC 2.3.1.41)(BSU11330);3-oxoacyl-[acyl-carrier-protein] synthase, KASII (EC 2.3.1.41)(BSU11340)	4mpACP_c + h_c + malACP_c --> 6m3ohACP_c + ACP_c + co2_c	( BSU11330 and BSU11340 ) or ( BSU10170 and BSU11340 )	['BSU11330/BSU11340'] or ['BSU10170/BSU11340']	['NA'] or ['NA']
rxn05417	3-oxoacyl-[acyl-carrier-protein] synthase III (EC 2.3.1.41);3-oxoacyl-[acyl-carrier-protein] synthase, KASIII (EC 2.3.1.41)(BSU11330);3-oxoacyl-[acyl-carrier-protein] synthase, KASII (EC 2.3.1.41)(BSU11340)	6mhACP_c + h_c + malACP_c --> 8m3oxACP_c + ACP_c + co2_c	( BSU11330 and BSU11340 ) or ( BSU10170 and BSU11340 )	['BSU11330/BSU11340'] or ['BSU10170/BSU11340']	['NA'] or ['NA']
rxn05421	3-oxoacyl-[acyl-carrier-protein] synthase III (EC 2.3.1.41);3-oxoacyl-[acyl-carrier-protein] synthase, KASIII (EC 2.3.1.41)(BSU11330);3-oxoacyl-[acyl-carrier-protein] synthase, KASII (EC 2.3.1.41)(BSU11340)	8mcACP_c + h_c + malACP_c --> 10m3ouACP_c + ACP_c + co2_c	( BSU11330 and BSU11340 ) or ( BSU10170 and BSU11340 )	['BSU11330/BSU11340'] or ['BSU10170/BSU11340']	['NA'] or ['NA']
rxn05425	3-oxoacyl-[acyl-carrier-protein] synthase III (EC 2.3.1.41);3-oxoacyl-[acyl-carrier-protein] synthase, KASIII (EC 2.3.1.41)(BSU11330);3-oxoacyl-[acyl-carrier-protein] synthase, KASII (EC 2.3.1.41)(BSU11340)	10muACP_c + h_c + malACP_c --> 12m3otACP_c + ACP_c + co2_c	( BSU11330 and BSU11340 ) or ( BSU10170 and BSU11340 )	['BSU11330/BSU11340'] or ['BSU10170/BSU11340']	['NA'] or ['NA']
rxn05429	3-oxoacyl-[acyl-carrier-protein] synthase III (EC 2.3.1.41);3-oxoacyl-[acyl-carrier-protein] synthase, KASIII (EC 2.3.1.41)(BSU11330);3-oxoacyl-[acyl-carrier-protein] synthase, KASII (EC 2.3.1.41)(BSU11340)	12mtACP_c + h_c + malACP_c --> 14m3opACP_c + ACP_c + co2_c	( BSU11330 and BSU11340 ) or ( BSU10170 and BSU11340 )	['BSU11330/BSU11340'] or ['BSU10170/BSU11340']	['NA'] or ['NA']
rxn05460	3-oxoacyl-[acyl-carrier-protein] synthase III (EC 2.3.1.41);3-oxoacyl-[acyl-carrier-protein] synthase, KASIII (EC 2.3.1.41)(BSU11330);3-oxoacyl-[acyl-carrier-protein] synthase, KASII (EC 2.3.1.41)(BSU11340)	h_c + hedACP_c + malACP_c --> 3oodACP_c + ACP_c + co2_c	( BSU11330 and BSU11340 ) or ( BSU10170 and BSU11340 )	['BSU11330/BSU11340'] or ['BSU10170/BSU11340']	['NA'] or ['NA']
BTNC	Biotin operon repressor|Biotin-protein ligase (EC 6.3.4.15);Biotin carboxylase of acetyl-CoA carboxylase (EC 6.3.4.14)(BSU24340);Biotin carboxyl carrier protein of acetyl-CoA carboxylase(BSU24350)	atp_c + btnCCP_c + hco3_c --> adp_c + cbtnCCP_c + h_c + pi_c	BSU24350 and BSU24340 and BSU22440	['BSU24350/BSU24340', 'BSU24350/BSU22440', 'BSU24340/BSU22440']	['NA', 'NA', 'NA']
MCCCrm	Methylcrotonyl-CoA carboxylase carboxyl transferase subunit (EC 6.4.1.4);Biotin carboxylase of methylcrotonyl-CoA carboxylase (EC 6.3.4.14)(BSU18240);Biotin carboxyl carrier protein of methylcrotonyl-CoA carboxylase(Bsu1823a)	3mb2coa_c + atp_c + hco3_c --> 3mgcoa_c + adp_c + h_c + pi_c	BSU18210 and BSU18240 and BSU23920	['BSU18210/Bsu1823a', 'BSU18210/BSU18240', 'Bsu1823a/BSU18240']	['NA', 'NA', 'NA']
LEUt2r	Branched-chain amino acid transport system carrier protein;branched-chain amino acid transport(BSU26700);branched-chain amino acid transport(BSU26710)	h_e + leu__L_e <=> h_c + leu__L_c	( BSU26690 and BSU26700 and BSU26710 ) or BSU29600	['BSU26690/BSU26700', 'BSU26690/BSU26710', 'BSU26700/BSU26710']	['NA', 'NA', 'NA']
ILEt2r	Branched-chain amino acid transport system carrier protein;branched-chain amino acid transport(BSU26700);branched-chain amino acid transport(BSU26710)	h_e + ile__L_e <=> h_c + ile__L_c	( BSU26690 and BSU26700 and BSU26710 ) or BSU29600	['BSU26690/BSU26700', 'BSU26690/BSU26710', 'BSU26700/BSU26710']	['NA', 'NA', 'NA']
VALt2r	Branched-chain amino acid transport system carrier protein;branched-chain amino acid transport(BSU26700);branched-chain amino acid transport(BSU26710)	h_e + val__L_e <=> h_c + val__L_c	( BSU26690 and BSU26700 and BSU26710 ) or BSU29600	['BSU26690/BSU26700', 'BSU26690/BSU26710', 'BSU26700/BSU26710']	['NA', 'NA', 'NA']
TEICH45	Putative teichuronic acid biosynthesis glycosyl transferase TuaH;Putative N-acetylgalactosaminyl-diphosphoundecaprenol glucuronosyltransferase(BSU35550);Putative teichuronic acid biosynthesis glycosyl transferase TuaC(BSU35590);Putative undecaprenyl-phosphate N-acetylgalactosaminyl 1-phosphate transferase|teichuronic acid biosynthesis glycosyltransferase TuaA(BSU35610);Teichuronic acid biosynthes…	45.0 udpacgal_c + 45.0 udpglcur_c <=> 45.0 h_c + teich_45_c + 45.0 udp_c + 45.0 ump_c	BSU35540 and BSU35550 and BSU35560 and BSU35570 and BSU35590 and BSU35600 and BSU35610	['BSU35540/BSU35550', 'BSU35540/BSU35560', 'BSU35540/BSU35570', 'BSU35540/BSU35590', 'BSU35540/BSU35600', 'BSU35540/BSU35610', 'BSU35550/BSU35560', 'BSU35550/BSU35570', 'BSU35550/BSU35590', 'BSU35550/BSU35600', 'BSU35550/BSU35610', 'BSU35560/BSU35570', 'BSU35560/BSU35590', 'BSU35560/BSU35600', 'BSU35560/BSU35610', 'BSU35570/BSU35590', 'BSU35570/BSU35600', 'BSU35570/BSU35610', 'BSU35590/BSU35600',…	['NA', 'NA', 'NA', 'NA', 'NA', 'NA', 'NA', 'NA', 'NA', 'NA', 'NA', 'NA', 'NA', 'NA', 'NA', 'NA', 'NA', 'NA', 'NA', 'NA', 'NA']
rxn05294	DNA polymerase III beta subunit;DNA gyrase subunit B(BSU00060);DNA gyrase subunit A(BSU00070);DNA polymerase III subunits gamma and Tau(BSU00190);DNA polymerase III delta prime subunit(BSU00310);DNA-cytosine methyltransferase (EC 2.1.1.37)(BSU06060);DNA ligase (EC 6.5.1.2)(BSU06620);ATP-dependent DNA ligase (EC 6.5.1.1) clustered with Ku protein, LigD(BSU13400);DNA topoisomerase I (EC 5.99.1.2)(B…	0.884 datp_c + 0.6684 dctp_c + 0.6692 dgtp_c + 0.8807 dttp_c <=> dna_c + 3.1023 ppi_c	( BSU20340 and BSU00010 and BSU28990 and BSU40440 and BSU22350 and BSU29230 and BSU25210 and BSU28980 and BSU00020 and BSU00190 and BSU25560 and BSU00310 and BSU06620 and BSU06610 and BSU16580 and BSU15710 and BSU40900 and BSU00070 and BSU00060 and BSU22790 and BSU18100 and BSU18090 and BSU15940 and BSU16120 and BSU23220 and BSU23210 and BSU06060 and BSU20500 ) or ( BSU00010 and BSU28990 and BSU4…	['BSU20340/BSU00010', 'BSU20340/BSU28990', 'BSU20340/BSU40440', 'BSU20340/BSU22350', 'BSU20340/BSU29230', 'BSU20340/BSU25210', 'BSU20340/BSU28980', 'BSU20340/BSU00020', 'BSU20340/BSU00190', 'BSU20340/BSU25560', 'BSU20340/BSU00310', 'BSU20340/BSU06620', 'BSU20340/BSU06610', 'BSU20340/BSU16580', 'BSU20340/BSU15710', 'BSU20340/BSU40900', 'BSU20340/BSU00070', 'BSU20340/BSU00060', 'BSU20340/BSU22790',…	['NA', 'NA', 'NA', 'NA', 'NA', 'NA', 'NA', 'NA', 'NA', 'NA', 'NA', 'NA', 'NA', 'NA', 'NA', 'NA', 'NA', 'NA', 'NA', 'NA', 'NA', 'NA', 'NA', 'NA', 'NA', 'NA', 'NA', 'NA', 'NA', 'NA', 'NA', 'NA', 'NA', 'NA', 'NA', 'NA', 'NA', 'NA', 'NA', 'NA', 'NA', 'NA', 'NA', 'NA', 'NA', 'NA', 'NA', 'NA', 'NA', 'NA', 'NA', 'NA', 'NA', 'NA', 'NA', 'NA', 'NA', 'NA', 'NA', 'NA', 'NA', 'NA', 'NA', 'NA', 'NA', 'NA', 'N…
rxn05295	DNA-directed RNA polymerase beta subunit (EC 2.7.7.6);DNA-directed RNA polymerase beta' subunit (EC 2.7.7.6)(BSU01080);DNA-directed RNA polymerase alpha subunit (EC 2.7.7.6)(BSU01430);Ribonuclease III (EC 3.1.26.3)(BSU15930);tRNA (Guanine37-N1) -methyltransferase (EC 2.1.1.31)(BSU16030);Ribonuclease P protein component (EC 3.1.26.5)(BSU41050);DNA-directed RNA polymerase subunit omega (RNAP omega …	0.7706 atp_c + 0.5853 ctp_c + 0.9496 gtp_c + 0.6331 utp_c --> cpd11462_c + 2.9386 ppi_c	BSU01430 and BSU01070 and BSU01080 and BSU25200 and BSU22450 and BSU08930 and BSU15930 and BSU41050 and BSU16030 and BSU27500 and BSU40410 and BSU40400 and BSU09510 and BSU16600 and BSU15690	['BSU01430/BSU01070', 'BSU01430/BSU01080', 'BSU01430/BSU25200', 'BSU01430/BSU22450', 'BSU01430/BSU08930', 'BSU01430/BSU15930', 'BSU01430/BSU41050', 'BSU01430/BSU16030', 'BSU01430/BSU27500', 'BSU01430/BSU40410', 'BSU01430/BSU40400', 'BSU01430/BSU09510', 'BSU01430/BSU16600', 'BSU01430/BSU15690', 'BSU01070/BSU01080', 'BSU01070/BSU25200', 'BSU01070/BSU22450', 'BSU01070/BSU08930', 'BSU01070/BSU15930',…	['NA', 'NA', 'NA', 'NA', 'NA', 'NA', 'NA', 'NA', 'NA', 'NA', 'NA', 'NA', 'NA', 'NA', 'NA', 'NA', 'NA', 'NA', 'NA', 'NA', 'NA', 'NA', 'NA', 'NA', 'NA', 'NA', 'NA', 'NA', 'NA', 'NA', 'NA', 'NA', 'NA', 'NA', 'NA', 'NA', 'NA', 'NA', 'NA', 'NA', 'NA', 'NA', 'NA', 'NA', 'NA', 'NA', 'NA', 'NA', 'NA', 'NA', 'NA', 'NA', 'NA', 'NA', 'NA', 'NA', 'NA', 'NA', 'NA', 'NA', 'NA', 'NA', 'NA', 'NA', 'NA', 'NA', 'N…
rxn05296	Macromolecular Synthesis	0.5051 alatrna_c + 0.3653 argtrna_c + 0.2801 asntrna_c + 0.2801 asptrna_c + 0.1073 cystrna_c + 0.4928 glntrna_c + 0.4928 glutrna_c + 0.7723 glytrna_c + 0.1546 histrna_c + 0.5107 iletrna_c + 0.6555 leutrna_c + 0.6114 lystrna_c + 0.2145 mettrna_c + 0.3329 phetrna_c + 0.3041 protrna_c + 0.4091 sertrna_c + 0.3526 thrtrna_c + 0.1028 trptrna_c + 0.2097 tyrtrna_c + 0.5807 valtrna_c <=> PROTEIN_c + 0.505…	BSU00670 and BSU00990 and BSU01030 and BSU01040 and BSU01050 and BSU01100 and BSU01110 and BSU01150 and BSU01160 and BSU01170 and BSU01180 and BSU01190 and BSU01200 and BSU01210 and BSU01220 and BSU01230 and BSU01240 and BSU01250 and BSU01260 and BSU01270 and BSU01280 and BSU01290 and BSU01300 and BSU01310 and BSU01320 and BSU01330 and BSU01340 and BSU01350 and BSU01400 and BSU01410 and BSU01420 …	['BSU00670/BSU00990', 'BSU00670/BSU01030', 'BSU00670/BSU01040', 'BSU00670/BSU01050', 'BSU00670/BSU01100', 'BSU00670/BSU01110', 'BSU00670/BSU01150', 'BSU00670/BSU01160', 'BSU00670/BSU01170', 'BSU00670/BSU01180', 'BSU00670/BSU01190', 'BSU00670/BSU01200', 'BSU00670/BSU01210', 'BSU00670/BSU01220', 'BSU00670/BSU01230', 'BSU00670/BSU01240', 'BSU00670/BSU01250', 'BSU00670/BSU01260', 'BSU00670/BSU01270',…	['NA', 'NA', 'NA', 'NA', 'NA', 'NA', 'NA', 'NA', 'NA', 'NA', 'NA', 'NA', 'NA', 'NA', 'NA', 'NA', 'NA', 'NA', 'NA', 'NA', 'NA', 'NA', 'NA', 'NA', 'NA', 'NA', 'NA', 'NA', 'NA', 'NA', 'NA', 'NA', 'NA', 'NA', 'NA', 'NA', 'NA', 'NA', 'NA', 'NA', 'NA', 'NA', 'NA', 'NA', 'NA', 'NA', 'NA', 'NA', 'NA', 'NA', 'NA', 'NA', 'NA', 'NA', 'NA', 'NA', 'NA', 'NA', 'NA', 'NA', 'NA', 'NA', 'NA', 'NA', 'NA', 'NA', 'N…

## Sheet: Table S5
Table S5. Modification of reaction boundaries.
ID	Equation	bounds(original)	bounds(corrected)	Reason	Ref
EX_nh4_e	nh4_e <=>	(-5,1000)	(-1000,1000)	substrate utilization
EX_pi_e	pi_e <=>	(-5,1000)	(-1000,1000)	substrate utilization
EX_chor_e	chor_e <=>	(-5,1000)	(0,1000)	substrate utilization
P5CR	nadp_c + pro__L_c <-- 1pyr5c_c + h_c + nadph_c	(-1000,1000)	(-1000,0)	reducing power	https://metacyc.org/META/NEW-IMAGE?object=PYRROLINECARBREDUCT-RXN&redirect=T
PRO1xm	nad_c + pro__L_c <-- 1pyr5c_c + h_c + nadh_c	(-1000,1000)	(-1000,0)	reducing power	https://metacyc.org/META/NEW-IMAGE?object=PYRROLINECARBREDUCT-RXN&redirect=T
NODOy	nadph_c + 2.0 no_c + 2.0 o2_c --> h_c + nadp_c + 2.0 no3_c	(-1000,1000)	(0,1000)	reducing power	https://metacyc.org/META/NEW-IMAGE?object=R621-RXN&redirect=T
NODOx	nadh_c + 2.0 no_c + 2.0 o2_c --> h_c + nad_c + 2.0 no3_c	(-1000,1000)	(0,1000)	reducing power	https://metacyc.org/META/NEW-IMAGE?object=R621-RXN&redirect=T
CYOR3m	2.0 ficytC_c + h_c + mql7_c --> 2.0 focytc_c + 3.0 h_e + mqn7_c	(0,0)	(0,1000)	respiratory chain	https://metacyc.org/gene?orgid=META&id=BSU22550-MONOMER
CYOO3	2.0 focytc_c + 6.0 h_c + 0.5 o2_c --> 2.0 ficytC_c + h2o_c + 4.0 h_e	(0,0)	(0,1000)	respiratory chain	https://metacyc.org/gene?orgid=META&id=BSU14900-MONOMER
CYTB_B2	2.0 h_c + mql7_c + 0.5 o2_c --> h2o_c + 2.0 h_e + mqn7_c	(0,0)	(0,1000)	respiratory chain	https://metacyc.org/gene?orgid=META&id=BSU38150-MONOMER
MALt2r	h_e + mal__L_e <=> h_c + mal__L_c	(-1000,0)	(-1000,1000)	substrate utilization	https://metacyc.org/META/NEW-IMAGE?type=REACTION&object=TRANS-RXN0-451
MALTly	h2o_c + malt_c --> 2.0 glc__D_c	(-1000,1000)	(0,1000)	substrate utilization	https://biocyc.org/META/new-image?object=RXN-2141
GLUt2r	glu__L_e + h_e <=> glu__L_c + h_c	(-1000,0)	(-1000,1000)	substrate utilization	https://metacyc.org/META/NEW-IMAGE?type=REACTION&object=TRANS-RXN-162

## Sheet: Table S6
Table S6. Biomass reaction standardization and mass balance using BiomassMW.
ID	Equation(original)	Equation(corrected)
CYTD	h2o[c] + cytd[c] -> nh4[c] + uri[c]	h2o[c] + h[c] + cytd[c] -> nh4[c] + uri[c]
HIUH	h2o[c] + 5hiu[c] <=> 5houdic[c]	h2o[c] + 5hiu[c] <=> h[c] + 5houdic[c]
bio00006	105 h2o[c] + 105.003 atp[c] + 0.01822 nad[c] + 0.0002367 nadph[c] + 0.001053 nadp[c] + 0.000127618 coa[c] + 0.0008548 ppi[c] + 0.5284 PROTEIN[c] + 0.005253 amp[c] + 0.0002215 gdp[c] + 0.026 dna[c] + 0.0004883 gtp[c] + 0.001153 cmp[c] + 0.0006105 ctp[c] + 0.002983 ca2[c] + 0.0002924 cdp[c] + 0.0005939 gmp[c] + 0.000273109 ACP[c] + 0.000206831 10fthf[c] + 0.6576 k[c] + 0.09474 mg2[c] + 0.00014977 m…	105 h2o[c] + 105.003 atp[c] + 0.01822 nad[c] + 0.0002367 nadph[c] + 0.001053 nadp[c] + 0.000127618 coa[c] + 0.0008548 ppi[c] + 0.5284 PROTEIN[c] + 0.005253 amp[c] + 0.0002215 gdp[c] + 0.026 dna[c] + 0.0004883 gtp[c] + 0.001153 cmp[c] + 0.0006105 ctp[c] + 0.002983 ca2[c] + 0.0002924 cdp[c] + 0.0005939 gmp[c] + 0.000273109 ACP[c] + 0.000206831 10fthf[c] + 0.6576 k[c] + 0.09474 mg2[c] + 0.00014977 m…
r0120	h2o[c] + gtp[c] -> HC01651[c]	h2o[c] + gtp[c] + 3 h[c] -> HC01651[c]
r0708	HC01710[c] -> h2o[c] + ahdt[c]	HC01710[c] -> h2o[c] + 3 h[c] + ahdt[c]
r0775	h2o[c] + HC01651[c] -> for[c] + HC01652[c]	h2o[c] + HC01651[c] -> for[c] + h[c] + HC01652[c]
rxn05294	0.884 datp[c] + 0.6692 dgtp[c] + 0.6684 dctp[c] + 0.8807 dttp[c] <=> 3.1023 ppi[c] + dna[c]	0.925408 datp[c] + 0.700547 dgtp[c] + 0.699709 dctp[c] + 0.921954 dttp[c] <=> 3.24762 ppi[c] + dna[c]
rxn05295	0.7706 atp[c] + 0.9496 gtp[c] + 0.5853 ctp[c] + 0.6331 utp[c] -> 2.9386 ppi[c] + cpd11462[c]	0.810308 atp[c] + 0.998532 gtp[c] + 0.61546 ctp[c] + 0.665723 utp[c] -> 3.09002 ppi[c] + cpd11462[c]
rxn05296	0.5051 alatrna[c] + 0.6114 lystrna[c] + 0.6555 leutrna[c] + 0.3653 argtrna[c] + 0.4928 glntrna[c] + 0.7723 glytrna[c] + 0.2145 mettrna[c] + 0.4091 sertrna[c] + 0.5807 valtrna[c] + 0.3041 protrna[c] + 0.2097 tyrtrna[c] + 0.2801 asptrna[c] + 0.4928 glutrna[c] + 0.1546 histrna[c] + 0.3526 thrtrna[c] + 0.1073 cystrna[c] + 0.5107 iletrna[c] + 0.2801 asntrna[c] + 0.3329 phetrna[c] + 0.1028 trptrna[c] <…	0.587425 alatrna[c] + 0.711051 lystrna[c] + 0.762338 leutrna[c] + 0.424839 argtrna[c] + 0.57312 glntrna[c] + 0.898175 glytrna[c] + 0.249461 mettrna[c] + 0.475778 sertrna[c] + 0.675347 valtrna[c] + 0.353665 protrna[c] + 0.243878 tyrtrna[c] + 0.325753 asptrna[c] + 0.57312 glutrna[c] + 0.179798 histrna[c] + 0.410069 thrtrna[c] + 0.124789 cystrna[c] + 0.593938 iletrna[c] + 0.325753 asntrna[c] + 0.387…
rxn10198	0.0145 tcam[c] + 0.453 cpd15665[c] + 0.016 cpd15667[c] + 0.0112 cpd15668[c] + 0.00808 cpd15669[c] <=> CELLWALL[c] + 0.48828 cpd15666[c]	0.0145388 tcam[c] + 0.454211 cpd15665[c] + 0.0160428 cpd15667[c] + 0.0112299 cpd15668[c] + 0.0081016 cpd15669[c] <=> CELLWALL[c] + 0.489585 cpd15666[c]
rxn10200	0.004866 cpd15746[c] + 0.001122 myrs24u[c] + 0.001761 cpd15748[c] + 0.003687 cpd15749[c] + 0.008667 cpd15750[c] + 0.0005365 cpd15751[c] + 0.009356 cpd15752[c] + 0.01585 antp24u[c] + 0.002264 cpd15754[c] + 0.002269 palmt24s[c] + 0.0005201 cpd15756[c] + 0.0008257 steart24s[c] + 0.001724 isohep24s[c] + 0.004053 antla24s[c] + 0.0002488 cpd15760[c] + 0.00435 cpd15761[c] + 0.00737 ant24glcs[c] + 0.0010…	0.0048809 cpd15746[c] + 0.00112543 myrs24u[c] + 0.00176639 cpd15748[c] + 0.00369829 cpd15749[c] + 0.00869353 cpd15750[c] + 0.000538142 cpd15751[c] + 0.00938464 cpd15752[c] + 0.0158985 antp24u[c] + 0.00227093 cpd15754[c] + 0.00227595 palmt24s[c] + 0.000521692 cpd15756[c] + 0.000828228 steart24s[c] + 0.00172928 isohep24s[c] + 0.00406541 antla24s[c] + 0.000249562 cpd15760[c] + 0.00436332 cpd15761[c]…
rxn10201	0.01816 pe140[c] + 0.07327 pe160[c] + 0.02483 pe180[c] + 0.005699 phosglcditetdec[c] + 0.02308 phosglcdihexdec[c] + 0.007846 phosglcdioctdec[c] + 0.05369 cpd15695[c] + 0.1262 dianethal[c] + 0.008684 cpd15697[c] + 0.1459 cpd15698[c] + 0.2473 cpd15699[c] + 0.0341 cpd15700[c] + 0.008709 cpd15707[c] + 0.002095 cpd15708[c] + 0.003029 cpd15709[c] + 0.006468 cpd15710[c] + 0.0152 cpd15711[c] + 0.001002 c…	0.0182339 pe140[c] + 0.0735684 pe160[c] + 0.0249311 pe180[c] + 0.00572221 phosglcditetdec[c] + 0.023174 phosglcdihexdec[c] + 0.00787795 phosglcdioctdec[c] + 0.0539086 cpd15695[c] + 0.126714 dianethal[c] + 0.00871936 cpd15697[c] + 0.146494 cpd15698[c] + 0.248307 cpd15699[c] + 0.0342389 cpd15700[c] + 0.00874446 cpd15707[c] + 0.00210353 cpd15708[c] + 0.00304133 cpd15709[c] + 0.00649434 cpd15710[c] +…

## Sheet: Table S7
Table S7. Reactions for kcat calibration.
No	ID	Reaction	kcat (old)	kcat (modified)	μmax
			(1/s)	(1/s)	(1/h)
1	ATNS_nh4	nh4_c + chor_c --> h2o_c + pyr_c + h_c + anth_c	0.0045	383	0.114124
2	ADK1m	atp_c + amp_c --> 2.0 adp_c	0.0845556	999	0.180081
3	GLUTRS_Gln	atp_c + glu__L_c + trnagln_c --> ppi_c + amp_c + glutrnaln_c	0.05	3.61	0.201637
4	GLUTRS	atp_c + glu__L_c + trnaglu_c --> ppi_c + amp_c + glutrna_c	0.05	3.61	0.229055
5	ENOm	2pg_c <=> h2o_c + pep_c	107.5	230	0.240717
6	ATPS4r	adp_c + pi_c + 4.0 h_e --> h2o_c + atp_c + 3.0 h_c	107.388	390	0.258487
7	PC	atp_c + pyr_c + hco3_c --> adp_c + pi_c + oaa_c + h_c	5.78695	60	0.28111
8	CHRS	3psme_c --> pi_c + h_c + chor_c	0.43915	0.87	0.292131
9	rxn05375_num1	h_c + malACP_c + 10mdACP_c --> co2_c + ACP_c + 123oxtACP_c	0.170857	551	0.30321
10	rxn05371_num1	h_c + malACP_c + 8mdACP_c --> co2_c + ACP_c + cpd11508_c	0.170857	551	0.315162
11	rxn05367_num1	h_c + malACP_c + 6moACP_c --> co2_c + ACP_c + 8m3odACP_c	0.170857	551	0.328096
12	rxn05363_num1	h_c + malACP_c + 4methexACP_c --> co2_c + ACP_c + 6m3oACP_c	0.170857	551	0.342137
13	rxn05359_num1	h_c + malACP_c + 2mbutACP_c --> co2_c + ACP_c + 4m3ohexACP_c	0.170857	551	0.357433
14	r0393_num5	h2o_c + nad_c + glyald_c <=> nadh_c + 2.0 h_c + glyc__R_c	1.374	999	0.372018
15	IPPS	h2o_c + accoa_c + 3mob_c --> coa_c + h_c + 3c3hmp_c	2.52186	450	0.38233
16	ADSS	gtp_c + asp__L_c + imp_c --> pi_c + gdp_c + 2.0 h_c + dcamp_c	0.47	999	0.39322
17	ICDHyr	icit_c + nadp_c --> akg_c + nadph_c + co2_c	21.02	999	0.394682
18	GAPDHf	nad_c + pi_c + g3p_c <=> nadh_c + 13dpg_c	106.673	999	0.410466
19	FBAf	fdp_B_c <=> dhap_c + g3p_c	5.41402	64.5	0.455443
20	ACOAD20	o2_c + 2.0 2mbcoa_c <=> 2.0 h2o_c + 2.0 2mb2coa_c	9.71	40.7	0.455443
21	rxn05384_num1	h_c + malACP_c + isovACP_c --> co2_c + ACP_c + 5m3hhACP_c	0.170857	551	0.469579
22	rxn05392_num1	h_c + malACP_c + 7moACP_c --> co2_c + ACP_c + 9m3odACP_c	0.170857	551	0.484621
23	CYOO3	0.5 o2_c + 6.0 h_c + 2.0 focytc_c --> h2o_c + 4.0 h_e + 2.0 ficytC_c	24.7011	2000	0.51049
24	rxn05388_num1	h_c + malACP_c + 3mehacp_c --> co2_c + ACP_c + 7me3oxoacp_c	0.170857	551	0.528242
25	rxn05396_num1	h_c + malACP_c + 9mdACP_c --> co2_c + ACP_c + 11m3odACP_c	0.170857	551	0.547273
26	rxn05400_num1	gtp_c + asp__L_c + imp_c --> pi_c + gdp_c + 2.0 h_c + dcamp_c	0.170857	551	0.567727
27	rxn05295	h_c + malACP_c + 9mdACP_c --> co2_c + ACP_c + 11m3odACP_c	1.61964	551	0.589705
28	ASPTRS	asp__L_c + atp_c + trnaasp_c <=> amp_c + asptrna_c + ppi_c	0.63546	999	0.611951

## Sheet: Table S8
Table S8. Enzyme cost of energy metabolism.
Glucsoe (mmol/gDW/h)	ATP produced per flux of glucose (mmol/gDW/h)	Enzyme required per flux of glucose (g enzyme / gDW)	Enzyme cost (g enzyme for 1 mol ATP / h)	Oxidative phosphorylation ratio
1	11.695	0.008749	0.074809	2.55649
1.5	11.6724	0.008748	0.074946	2.56451
2	11.6611	0.008748	0.075015	2.56851
2.5	11.6459	0.008748	0.075118	2.57192
3	11.2938	0.009048	0.080112	2.61807
3.5	11.1763	0.009007	0.080589	2.65588
4	11.0899	0.008973	0.080913	2.68429
4.5	11.0226	0.008947	0.081167	2.70638
5	10.9688	0.008926	0.081374	2.72405
5.5	10.9248	0.008909	0.081544	2.73852
6	10.8882	0.008894	0.081687	2.75057
6.5	10.8571	0.008882	0.081808	2.76077
7	10.8154	0.008907	0.082355	2.7745
7.5	10.819	0.00881	0.081433	2.79129
8	11.4999	0.00749	0.065127	2.81996
8.5	11.3225	0.006929	0.061193	2.66088
9	10.8226	0.006547	0.060496	2.40585
9.5	10.3754	0.006206	0.059816	2.17767
10	9.97283	0.005899	0.059152	1.9723

## Sheet: Table S9
Table S9. Growth rates on different carbon sources predicted using iBsu1147R and ecBSU1.
Substrate (mmol/gDW/h)	experimental data(h-1)	growth rates in iBsu1147(h-1)	growth rates in ecBSU1(h-1)
glc=7.63	0.59	0.613121	0.562978
fru=5.72	0.53	0.449656	0.428027
6pgc=5.13	0.42	0.402579	0.376559
succ=3.35, glu__L=2.21	0.22	0.233509	0.226086
glyc=6.22	0.4	0.274247	0.270877
pyr=8.26	0.17	0.227257	0.215941
mal=26.51	0.57	1.02004	0.618136
glc=5.95, mal=14.6	0.75	1.05297	0.642754

## Sheet: Table S10
Table S10. Target prediction based on enzyme cost.
Target	ID	Fluxes	Reaction equation	Ec-code	kcat_MW	Enzyme cost	GPR	Gene Names	Literature Support	Ref
riboflavin	DB4PS	0.265067	ru5p__D_c --> db4p_c + for_c + h_c	3.5.4.25	3.46774	0.0764379	BSU23260	RibA	Y	Shi et al,2009(10.1016/j.ymben.2009.05.002)
	GTPCII2	0.132533	gtp_c + 3.0 h2o_c --> 25drapp_c + for_c + h_c + ppi_c	3.5.4.25	3.46774	0.0382189	BSU23260	RibA	Y	Shi et al,2009(10.1016/j.ymben.2009.05.002)
	RBFSa	0.265067	4r5au_c + db4p_c --> dmlz_c + 2.0 h2o_c + h_c + pi_c	2.5.1.9	19.7649	0.013411	BSU23250	RibH	Y	Shi et al,2009(10.1016/j.ymben.2009.05.002)
	ADSL2r	0.144123	25aics_c --> aicar_c + fum_c	4.3.2.2	28.691	0.00502328	BSU06440	PurB	Y	Shi et al,2009(10.1016/j.bej.2009.04.008)
	G3PD4	6.51397	glyc3p_c + mqn7_c --> dhap_c + mql7_c	1.1.99.5	1916.03	0.00339972	BSU09300	GlpD
	DHPPDA2	0.132533	25drapp_c + h2o_c + h_c --> 5apru_c + nh4_c	1.1.1.193,3.5.4.26	39.0219	0.00339639	BSU23280	RibD	Y	Shi et al,2009(10.1016/j.ymben.2009.05.002)
	AUNOR_reverse	0.132533	5apru_c + h_c + nadph_c --> 5aprbu_c + nadp_c		39.0219	0.00339639	BSU23280	RibD	Y	Shi et al,2009(10.1016/j.ymben.2009.05.002)
	ATPS4r	10.1172	adp_c + 4.0 h_e + pi_c --> atp_c + h2o_c + 3.0 h_c	7.1.2.2	3210.95	0.00315084	BSU36800 and BSU36810 and BSU36820 and BSU36830 and BSU36840 and BSU36850 and BSU36860 and BSU36870 and BSU36880	NA
	RBFSb	0.132533	2.0 dmlz_c --> 4r5au_c + ribflv_c	2.5.1.9	54.8365	0.00241688	BSU23270	RibE	Y	Shi et al,2009(10.1016/j.ymben.2009.05.002)
	ENOm	3.40322	2pg_c --> h2o_c + pep_c	4.2.1.11	2221.94	0.00153164	BSU33900	Eno
	SUCOAS_reverse	2.74207	adp_c + pi_c + succoa_c --> atp_c + coa_c + succ_c		1868	0.00146792	BSU16090 and BSU16100	SucC;SucD
	CHRS	0.0238182	3psme_c --> chor_c + h_c + pi_c	4.2.3.5	18.2921	0.0013021	BSU22710	AroC	Y	Liu et al,2014(10.1186/1475-2859-13-40)
	PFKh	1.91641	atp_c + f6p_B_c --> adp_c + fdp_B_c	2.7.1.11	2223.35	0.000861948	BSU29190	PfkA
	CBPS_num1	0.0211573	2.0 atp_c + gln__L_c + h2o_c + hco3_c --> 2.0 adp_c + cbp_c + glu__L_c + h_c + pi_c	6.3.5.5	39.8004	0.000531584	BSU11230 and BSU11240	PyrAA;PyrAB
	AICART	0.149823	10fthf_c + aicar_c --> fprica_c + thf_c	3.5.4.10,2.1.2.3	298.382	0.000502119	BSU06520	PurH	Y	Shi et al,2009(10.1016/j.bej.2009.04.008)
5-methyltetrahydrofolate	GTPCI_num2	0.0107711	gtp_c + h2o_c --> ahdt_c + for_c + h_c	3.5.4.16	0.11457	0.0940129	BSU03340	FolE	Y	Yang et al,2022(10.1021/acs.jafc.2c01252)
	ADCS	0.0107711	chor_c + gln__L_c --> 4adcho_c + glu__L_c	2.6.1.85,4.1.3.27	0.216187	0.0498229	BSU00740 and BSU00750	PabA,PabB	Y	Yang et al,2022(10.1021/acs.jafc.2c01252)
	G3PD4	5.37318	glyc3p_c + mqn7_c --> dhap_c + mql7_c	1.1.99.5	1916.03	0.00280432	BSU09300	GlpD
	ATPS4r	8.54667	adp_c + 4.0 h_e + pi_c --> atp_c + h2o_c + 3.0 h_c	7.1.2.2	3210.95	0.00266173	BSU36800 and BSU36810 and BSU36820 and BSU36830 and BSU36840 and BSU36850 and BSU36860 and BSU36870 and BSU36880	NA
	CHRS	0.0345768	3psme_c --> chor_c + h_c + pi_c	4.2.3.5	18.2921	0.00189026	BSU22710	AroC	Y	Liu et al,2014(10.1186/1475-2859-13-40)
	ENOm	3.13016	2pg_c --> h2o_c + pep_c	4.2.1.11	2221.94	0.00140875	BSU33900	Eno
	SUCOAS_reverse	2.43674	adp_c + pi_c + succoa_c --> atp_c + coa_c + succ_c		1868	0.00130447	BSU16090 and BSU16100	SucC;SucD
	ADSL2r	0.0223479	25aics_c --> aicar_c + fum_c	4.3.2.2	28.691	0.000778918	BSU06440	PurB	Y	Shi et al,2009(10.1016/j.bej.2009.04.008)
	PFKh	1.65273	atp_c + f6p_B_c --> adp_c + fdp_B_c	2.7.1.11	2223.35	0.000743351	BSU29190	PfkA
	CBPS_num1	0.0211573	2.0 atp_c + gln__L_c + h2o_c + hco3_c --> 2.0 adp_c + cbp_c + glu__L_c + h_c + pi_c	6.3.5.5	39.8004	0.000531584	BSU11230 and BSU11240	PyrAA;PyrAB
	ADSL1r	0.0121819	dcamp_c --> amp_c + fum_c	4.3.2.2	28.691	0.000424589	BSU06440	PurB	Y	Shi et al,2009(10.1016/j.bej.2009.04.008)
	rxn05379_num1	0.00223248	cpd11515_c + h_c + malACP_c --> 14m3ohdACP_c + ACP_c + co2_c	2.3.1.41	5.51811	0.000404573	BSU11330 and BSU11340	FabHA;FabF
	APSR_num1	0.0118893	aps_c + trdrd_c --> amp_c + so3_c + trdox_c	1.8.4.10,1.8.4.8	33.3318	0.000356695	BSU15570	cysH
	PGAMT_reverse	0.0199206	gam6p_c --> gam1p_c		58.2155	0.000342187	BSU01770	GlmM
	PC	0.144142	atp_c + hco3_c + pyr_c --> adp_c + h_c + oaa_c + pi_c	6.4.1.1	422.089	0.000341497	BSU14860	Pyc
uridine	CBPS_num1	4.09659	2.0 atp_c + gln__L_c + h2o_c + hco3_c --> 2.0 adp_c + cbp_c + glu__L_c + h_c + pi_c	6.3.5.5	39.8004	0.102928	BSU15510 and BSU15520	PyrAA;PyrAB	Y	Wang et al,2018(10.1007/s10529-017-2453-8)
	PC	4.20881	atp_c + hco3_c + pyr_c --> adp_c + h_c + oaa_c + pi_c	6.4.1.1	422.089	0.00997138	BSU14860	Pyc
	G3PD4	16.4017	glyc3p_c + mqn7_c --> dhap_c + mql7_c	1.1.99.5	1916.03	0.00856022	BSU09300	GlpD
	ATPS4r	21.7664	adp_c + 4.0 h_e + pi_c --> atp_c + h2o_c + 3.0 h_c	7.1.2.2	3210.95	0.00677879	BSU36800 and BSU36810 and BSU36820 and BSU36830 and BSU36840 and BSU36850 and BSU36860 and BSU36870 and BSU36880	NA
	ENOm	12.6876	2pg_c --> h2o_c + pep_c	4.2.1.11	2221.94	0.00571012	BSU33900	Eno
	SUCOAS_reverse	7.95098	adp_c + pi_c + succoa_c --> atp_c + coa_c + succ_c		1868	0.00425642	BSU16090 and BSU16100	SucC;SucD
	PFKh	7.10528	atp_c + f6p_B_c --> adp_c + fdp_B_c	2.7.1.11	2223.35	0.00319576	BSU29190	PfkA
	NTD2_num2	4.07543	h2o_c + ump_c --> h_c + pi_c + uri_c	3.1.3.5,3.1.4.16	1666.63	0.00244531	BSU07330	YfkN
	ASPTA_reverse_num3	4.1789	glu__L_c + oaa_c --> akg_c + asp__L_c		1907.14	0.00219119	BSU09570	YhdR
	DHORTSn_reverse	4.08312	cbasp_c + h_c --> dhor__S_c + h2o_c		2489.36	0.00164023	BSU15500	PyrC	Y	Wang et al,2018(10.1007/s10529-017-2453-8)
	CHRS	0.0238182	3psme_c --> chor_c + h_c + pi_c	4.2.3.5	18.2921	0.0013021	BSU22710	AroC
	ASPCT_1	4.08312	asp__L_c + cbp_c --> cbasp_c + 2.0 h_c + pi_c	2.1.3.2	3418.09	0.00119456	BSU15490	PyrB	Y	Wang et al,2018(10.1007/s10529-017-2453-8)
	FBAf	7.10528	fdp_B_c --> dhap_c + g3p_c	4.1.2.13	7638.1	0.000930242	BSU37120	FbaA
	DHORDfum	4.08312	dhor__S_c + o2_c --> h2o2_c + orot_c	1.3.3.1	4468.11	0.000913836	BSU15530 and BSU15540	PyrD;PyrK	Y	Wang et al,2018(10.1007/s10529-017-2453-8)
	ALAD_L_reverse	4.46523	h_c + nadh_c + nh4_c + pyr_c --> ala__L_c + h2o_c + nad_c		6265.82	0.000712632	BSU31930	SpoVN
Poly-γ-glutamic	PC	28.5354	atp_c + hco3_c + pyr_c --> adp_c + h_c + oaa_c + pi_c	6.4.1.1	422.089	0.0676052	BSU14860	Pyc
	ENOm	57.4167	2pg_c --> h2o_c + pep_c	4.2.1.11	2221.94	0.0258407	BSU33900	Eno
	PFKh	28.7906	atp_c + f6p_B_c --> adp_c + fdp_B_c	2.7.1.11	2223.35	0.0129492	BSU29190	PfkA
	G3PD4	22.3467	glyc3p_c + mqn7_c --> dhap_c + mql7_c	1.1.99.5	1916.03	0.011663	BSU09300	GlpD
	CS_num2	28.4692	accoa_c + h2o_c + oaa_c --> cit_c + coa_c + h_c	2.3.3.1	4558.32	0.00624554	BSU09440	CitA	Y	Sha et al,2019(10.1021/acs.jafc.9b01755)
	ALAD_L_reverse	37.4296	h_c + nadh_c + nh4_c + pyr_c --> ala__L_c + h2o_c + nad_c		6265.82	0.00597361	BSU31930	SpoVN
	ASPTA_reverse_num3	8.7412	glu__L_c + oaa_c --> akg_c + asp__L_c		1907.14	0.00458341	BSU09570	YhdR
	FBAf	28.7906	fdp_B_c --> dhap_c + g3p_c	4.1.2.13	7638.1	0.00376934	BSU37120	FbaA
	GAPDHf	57.4167	g3p_c + nad_c + pi_c --> 13dpg_c + nadh_c	1.2.1.12	25092	0.00228825	BSU33940	GapA
	GLUKA	28.853	atp_c + glc__D_c --> adp_c + g6p_A_c	2.7.1.2	13878	0.00207904	BSU24850	GlcK
	ALATA_D	21.8757	akg_c + ala__D_c --> glu__D_c + pyr_c	2.6.1.21	13161.5	0.0016621	BSU09670	Dat
	PYK	57.3629	adp_c + pep_c --> atp_c + pyr_c	2.7.1.40	36426.4	0.00157476	BSU29180	Pyk
	FUM_reverse	8.67497	fum_c + h2o_c --> mal__L_c		6252.33	0.00138748	BSU33040	FumC
	CHRS	0.0238182	3psme_c --> chor_c + h_c + pi_c	4.2.3.5	18.2921	0.0013021	BSU22710	AroC
	PGKm_reverse	57.4167	13dpg_c + adp_c --> 3pg_c + atp_c + h_c		55276	0.00103873	BSU33930	Pgk
MK-7	2S6HCCi	0.340262	akg_c + h_c + ichor_c --> 2shchc_c + co2_c + pyr_c	2.2.1.9	7.72336	0.0440562	BSU30820	MenD
	R07263	0.340262	h_c + sbzcoa_c --> 14dh2napcoa_c + h2o_c	4.1.3.36	16.413	0.0207313	BSU30800	MenB	Y	Cui et al,2019(10.1021/acssynbio.9b00140)
	CHRS	0.364059	3psme_c --> chor_c + h_c + pi_c	4.2.3.5	18.2921	0.0199025	BSU22710	AroC
	METAT	0.340262	atp_c + h2o_c + met__L_c --> amet_c + pi_c + ppi_c	2.5.1.6	19.9516	0.0170543	BSU30550	MetK
	MECDPS	2.38183	2p4c2me_c --> 2mecdp_c + cmp_c	4.6.1.12	163.499	0.0145679	BSU00910	IspF	Y	Chen et al,2020(10.4014/jmb.1912.12008)
	R05884	2.04157	h2mb4p_c + h_c + nadph_c --> h2o_c + ipdp_c + nadp_c	1.17.7.4	271.872	0.00750931	BSU25160	IspH	Y	Chen et al,2020(10.4014/jmb.1912.12008)
	DXPRIi_reverse	2.38183	dxyl5p_c + h_c + nadph_c --> 2me4p_c + nadp_c		374.098	0.00636687	BSU16550	Dxr	Y	Cui et al,2019(10.1021/acssynbio.9b00140)
	G3PD4	12.1661	glyc3p_c + mqn7_c --> dhap_c + mql7_c	1.1.99.5	1916.03	0.00634964	BSU09300	GlpD	Y	Yang et al,2019(10.1002/aic.16754)
	ATPS4r	18.5295	adp_c + 4.0 h_e + pi_c --> atp_c + h2o_c + 3.0 h_c	7.1.2.2	3210.95	0.00577072	BSU36800 and BSU36810 and BSU36820 and BSU36830 and BSU36840 and BSU36850 and BSU36860 and BSU36870 and BSU36880	NA
	ENOm	8.97593	2pg_c --> h2o_c + pep_c	4.2.1.11	2221.94	0.00403967	BSU33900	Eno
	DXPS	2.38183	g3p_c + h_c + pyr_c --> co2_c + dxyl5p_c	2.2.1.7	1277.07	0.00186508	BSU24270	Dxs	Y	Cui et al,2019(10.1021/acssynbio.9b00140)
	R07219	0.340262	h2mb4p_c + h_c + nadph_c --> dmpp_c + h2o_c + nadp_c	1.17.7.4	271.872	0.00125155	BSU25160	IspH	Y	Chen et al,2020(10.4014/jmb.1912.12008)
	PC	0.4736	atp_c + hco3_c + pyr_c --> adp_c + h_c + oaa_c + pi_c	6.4.1.1	422.089	0.00112204	BSU14860	Pyc
	PSCVT	0.364059	pep_c + skm5p_c --> 3psme_c + h_c + pi_c	2.5.1.19	451.199	0.00080687	BSU22600	AroA	Y	Cui et al,2019(10.1021/acssynbio.9b00140)
	ADPT	0.340262	ade_c + prpp_c --> amp_c + ppi_c	2.4.2.7	581.289	0.000585357	BSU27610	Apt
Thymidine	CBPS_num1	2.26253	2.0 atp_c + gln__L_c + h2o_c + hco3_c --> 2.0 adp_c + cbp_c + glu__L_c + h_c + pi_c	6.3.5.5	39.8004	0.0568469	BSU11230 and BSU11240	PyrAA;PyrAB
	RNDR4_num1	2.24281	trdrd_c + udp_c --> dudp_c + h2o_c + trdox_c	1.17.4.1	42.8007	0.0524013	BSU17380 and BSU17390 and BSU17370	Ndk	Y	Li et al,2016(10.1186/s12934-016-0494-7)
	G3PD4	13.7852	glyc3p_c + mqn7_c --> dhap_c + mql7_c	1.1.99.5	1916.03	0.00719465	BSU09300	GlpD
	PC	2.37476	atp_c + hco3_c + pyr_c --> adp_c + h_c + oaa_c + pi_c	6.4.1.1	422.089	0.00562619	BSU14860	Pyc
	ATPS4r	17.8508	adp_c + 4.0 h_e + pi_c --> atp_c + h2o_c + 3.0 h_c	7.1.2.2	3210.95	0.00555933	BSU36800 and BSU36810 and BSU36820 and BSU36830 and BSU36840 and BSU36850 and BSU36860 and BSU36870 and BSU36880	NA
	ENOm	11.7453	2pg_c --> h2o_c + pep_c	4.2.1.11	2221.94	0.00528607	BSU33900	Eno
	SUCOAS_reverse	6.64274	adp_c + pi_c + succoa_c --> atp_c + coa_c + succ_c		1868	0.00355608	BSU16090 and BSU16100	SucC;SucD
	TRDR	2.25724	h_c + nadph_c + trdox_c --> nadp_c + trdrd_c	1.8.1.9	733.847	0.00307589	BSU34790	TrxB
	PFKh	6.3285	atp_c + f6p_B_c --> adp_c + fdp_B_c	2.7.1.11	2223.35	0.00284639	BSU29190	PfkA
	DUTPDP_num2	2.24281	dutp_c + h2o_c --> dump_c + ppi_c	3.6.1.23	1253.69	0.00178897	BSU20020	Dut	Y	Li et al,2016(10.1186/s12934-016-0494-7)
	NTD5_num2	2.24137	dtmp_c + h2o_c --> h_c + pi_c + thymd_c	3.1.3.5,3.1.4.16	1666.63	0.00134485	BSU07330	YfnB
	CHRS	0.0238182	3psme_c --> chor_c + h_c + pi_c	4.2.3.5	18.2921	0.0013021	BSU22710	AroC
	ASPTA_reverse_num3	2.34484	glu__L_c + oaa_c --> akg_c + asp__L_c		1907.14	0.00122951	BSU09570	YhdR
	DHORTSn_reverse	2.24906	cbasp_c + h_c --> dhor__S_c + h2o_c		2489.36	0.00090347	BSU15500	PyrC
	FBAf	6.3285	fdp_B_c --> dhap_c + g3p_c	4.1.2.13	7638.1	0.000828544	BSU37120	FbaA
surfactin	MOHMT	0.393793	3mob_c + h2o_c + mlthf_c --> 2dhp_c + thf_c	2.1.2.11	9.4482	0.0416792	BSU22430	PanB
	ADSL1r	0.405951	dcamp_c --> amp_c + fum_c	4.3.2.2	28.691	0.0141491	BSU06440	PurB
	ADSL2r	0.405358	25aics_c --> aicar_c + fum_c	4.3.2.2	28.691	0.0141284	BSU06440	PurB
	APSR_num1	0.405658	aps_c + trdrd_c --> amp_c + so3_c + trdox_c	1.8.4.10,1.8.4.8	33.3318	0.0121703	BSU15570	CysH
	R03051	0.836653	alac__S_c + h_c + nadph_c --> DHAD1_c + nadp_c	1.1.1.86	177.017	0.00472641	BSU28290	IlvC	Y	Wu et al,2019(10.1016/j.ymben.2018.11.004)
	G3PD4	8.84457	glyc3p_c + mqn7_c --> dhap_c + mql7_c	1.1.99.5	1916.03	0.00461608	BSU09300	GlpD
	SUCpts	2.86191	pep_c + sucr_e --> pyr_c + suc6p_c	2.7.3.9,2.7.1.69	651.38	0.0043936	BSU13900 and BSU13910 and BSU38050	NA
	ENOm	9.71441	2pg_c --> h2o_c + pep_c	4.2.1.11	2221.94	0.00437203	BSU33900	Eno	Y	Wu et al,2019(10.1016/j.ymben.2018.11.004)
	ATPS4r	12.7358	adp_c + 4.0 h_e + pi_c --> atp_c + h2o_c + 3.0 h_c	7.1.2.2	3210.95	0.00396635	BSU36800 and BSU36810 and BSU36820 and BSU36830 and BSU36840 and BSU36850 and BSU36860 and BSU36870 and BSU36880	NA
	ACCOAC_1	2.02724	accoa_c + cbtnCCP_c --> btnCCP_c + malcoa_c	6.4.1.2	611.497	0.00331521	BSU29210 and BSU29200	AccA;AccD
	PANTS	0.393793	ala_B_c + atp_c + pant__R_c --> amp_c + pnto__R_c + ppi_c	6.3.2.1	121.35	0.0032451	BSU22420	PanC
	MOD_4mop	0.39728	4mop_c + h_c + thmpp_c --> 3mhtpp_c + co2_c	1.2.4.4	128.164	0.00309979	BSU24040 and BSU24050	BfmBAA;BfmBAB
	R07602	0.39728	3mhtpp_c + lpam_c --> 3mbdhl_c + thmpp_c	1.2.4.4	128.164	0.00309979	BSU24040 and BSU24050	BfmBAA;BfmBAB
	MCOATA	2.02724	ACP_c + malcoa_c --> coa_c + malACP_c	2.3.1.39	690.453	0.0029361	BSU15900	FabD	Y	Wu et al,2019(10.1016/j.ymben.2018.11.004)
	IPPMIb	0.421449	3c3hmp_c --> 2ippm_c + h2o_c	4.2.1.33	152.759	0.00275891	BSU28260	LeuC	Y	Wu et al,2019(10.1016/j.ymben.2018.11.004)
acetoin	R02947	24.4363	alac__S_c + h_c --> actn__R_c + co2_c	4.1.1.5	275.01	0.0888563	BSU36000	AlsD	Y	Xu et al,2018(10.1021/acs.jafc.8b00113)
	ENOm	49.4853	2pg_c --> h2o_c + pep_c	4.2.1.11	2221.94	0.0222712	BSU33900	Eno
	PFKh	24.8249	atp_c + f6p_B_c --> adp_c + fdp_B_c	2.7.1.11	2223.35	0.0111656	BSU29190	PfkA	Y	Xu et al,2018(10.1021/acs.jafc.8b00113)
	ASPTA_reverse_num3	9.89671	glu__L_c + oaa_c --> akg_c + asp__L_c		1907.14	0.0051893	BSU09570	YhdR
	G3PD4	9.79324	glyc3p_c + mqn7_c --> dhap_c + mql7_c	1.1.99.5	1916.03	0.00511121	BSU09300	GlpD
	PDHam1hi	24.5043	h_c + pyr_c + thmpp_c --> 2ahethmpp_c + co2_c	1.2.4.1,2.2.1.6	5655.54	0.00433279	BSU14580 and BSU14590	PdhA;PdhB	Y	Xu et al,2018(10.1021/acs.jafc.8b00113)
	R03050_reverse_num2	24.4855	2ahethmpp_c + pyr_c --> alac__S_c + thmpp_c		7025.46	0.00348525	BSU36010	AlsS	Y	Xu et al,2018(10.1021/acs.jafc.8b00113)
	FBAf	24.8249	fdp_B_c --> dhap_c + g3p_c	4.1.2.13	7638.1	0.00325014	BSU37120	FbaA
	GAPDHf	49.4853	g3p_c + nad_c + pi_c --> 13dpg_c + nadh_c	1.2.1.12	25092	0.00197215	BSU33940	GapA
	GLUKA	24.8873	atp_c + glc__D_c --> adp_c + g6p_A_c	2.7.1.2	13878	0.00179329	BSU24850	GlcK
	FUM_reverse	9.83048	fum_c + h2o_c --> mal__L_c		6252.33	0.00157229	BSU33040	FumC
	PYK	49.4315	adp_c + pep_c --> atp_c + pyr_c	2.7.1.40	36426.4	0.00135702	BSU29180	Pyk	Y	Xu et al,2018(10.1021/acs.jafc.8b00113)
	CHRS	0.0238182	3psme_c --> chor_c + h_c + pi_c	4.2.3.5	18.2921	0.0013021	BSU22710	AroC
	NTRIR2x	9.79324	5.0 h_c + 3.0 nadh_c + no2_c --> 2.0 h2o_c + 3.0 nad_c + nh4_c	1.7.1.1,1.7.1.4	7966.15	0.00122936	BSU03290 and BSU03300 and BSU03310 and BSU03320	NA
	PGKm_reverse	49.4853	13dpg_c + adp_c --> 3pg_c + atp_c + h_c		55276	0.00089524	BSU33930	Pgk
2,3-Butanediol	R02947	22.7175	alac__S_c + h_c --> actn__R_c + co2_c	4.1.1.5	275.01	0.0826063	BSU36000	AlsD	Y	Fu et al,2016(10.1021/acs.jafc.8b00113)
	ENOm	46.0476	2pg_c --> h2o_c + pep_c	4.2.1.11	2221.94	0.020724	BSU33900	Eno
	BTDD-RR_reverse	22.7175	actn__R_c + h_c + nadh_c --> 23btdl_c + nad_c		1245.72	0.0182365	BSU06240	BdhA	Y	Fu et al,2016(10.1021/acs.jafc.8b00113)
	PFKh	23.1061	atp_c + f6p_B_c --> adp_c + fdp_B_c	2.7.1.11	2223.35	0.0103925	BSU29190	PfkA
	PDHam1hi	22.7855	h_c + pyr_c + thmpp_c --> 2ahethmpp_c + co2_c	1.2.4.1,2.2.1.6	5655.54	0.00402887	BSU14580 and BSU14590	PdhA;PdhB	Y	Fu et al,2016(10.1021/acs.jafc.8b00113)
	R03050_reverse_num2	22.7666	2ahethmpp_c + pyr_c --> alac__S_c + thmpp_c		7025.46	0.00324059	BSU36010	AlsS	Y	Fu et al,2016(10.1021/acs.jafc.8b00113)
	FBAf	23.1061	fdp_B_c --> dhap_c + g3p_c	4.1.2.13	7638.1	0.00302511	BSU37120	FbaA
	ASPTA_reverse_num3	4.66568	glu__L_c + oaa_c --> akg_c + asp__L_c		1907.14	0.00244643	BSU09570	YhdR
	G3PD4	4.5622	glyc3p_c + mqn7_c --> dhap_c + mql7_c	1.1.99.5	1916.03	0.00238107	BSU09300	GlpD
	GAPDHf	46.0476	g3p_c + nad_c + pi_c --> 13dpg_c + nadh_c	1.2.1.12	25092	0.00183515	BSU33940	GapA
	GLUKA	23.1685	atp_c + glc__D_c --> adp_c + g6p_A_c	2.7.1.2	13878	0.00166944	BSU24850	GlcK
	CHRS	0.0238182	3psme_c --> chor_c + h_c + pi_c	4.2.3.5	18.2921	0.0013021	BSU22710	AroC
	PYK	45.9939	adp_c + pep_c --> atp_c + pyr_c	2.7.1.40	36426.4	0.00126265	BSU29180	Pyk
	FUM_reverse	4.59944	fum_c + h2o_c --> mal__L_c		6252.33	0.000735637	BSU33040	FumC
	PGKm_reverse	36.3146	13dpg_c + adp_c --> 3pg_c + atp_c + h_c		55276	0.000656969	BSU33930	Pgk
N-acetylglucosamine	GF6PTA	32.9129	f6p_B_c + gln__L_c --> gam6p_c + glu__L_c	2.6.1.16	336.093	0.0979281	BSU01780	GlmS	Y	Gu et al,2019(10.1016/j.ymben.2018.10.002)
	ENOm	33.5055	2pg_c --> h2o_c + pep_c	4.2.1.11	2221.94	0.0150794	BSU33900	Eno
	G3PD4	24.2786	glyc3p_c + mqn7_c --> dhap_c + mql7_c	1.1.99.5	1916.03	0.0126713	BSU09300	GlpD
	PFKh	16.835	atp_c + f6p_B_c --> adp_c + fdp_B_c	2.7.1.11	2223.35	0.00757193	BSU29190	PfkA	Y	Gu et al,2019(10.1016/j.ymben.2018.10.002)
	ATPS4r	17.627	adp_c + 4.0 h_e + pi_c --> atp_c + h2o_c + 3.0 h_c	7.1.2.2	3210.95	0.00548965	BSU36800 and BSU36810 and BSU36820 and BSU36830 and BSU36840 and BSU36850 and BSU36860 and BSU36870 and BSU36880	NA
	GLNS	32.9914	atp_c + glu__L_c + nh4_c --> adp_c + gln__L_c + h_c + pi_c	6.3.1.2	9107.39	0.00362249	BSU17460	GlnA
	GLUKA	49.7904	atp_c + glc__D_c --> adp_c + g6p_A_c	2.7.1.2	13878	0.00358771	BSU24850	GlcK	Y	Ling et al,2017(10.1016/j.biortech.2017.09.063)
	FBAf	16.835	fdp_B_c --> dhap_c + g3p_c	4.1.2.13	7638.1	0.00220409	BSU37120	FbaA	Y	Gu et al,2019(10.1016/j.ymben.2018.10.002)
	GAPDHf	33.5055	g3p_c + nad_c + pi_c --> 13dpg_c + nadh_c	1.2.1.12	25092	0.00133531	BSU33940	GapA
	CHRS	0.0238182	3psme_c --> chor_c + h_c + pi_c	4.2.3.5	18.2921	0.0013021	BSU22710	AroC
	ASPTA_reverse_num3	2.28044	glu__L_c + oaa_c --> akg_c + asp__L_c		1907.14	0.00119574	BSU09570	YhdR
	PYK	33.4518	adp_c + pep_c --> atp_c + pyr_c	2.7.1.40	36426.4	0.000918339	BSU29180	Pyk
	PTAr_reverse	33.1287	actp_c + coa_c --> accoa_c + h_c + pi_c		37911.2	0.00087385	BSU37660	Pta
	PGKm_reverse	33.5055	13dpg_c + adp_c --> 3pg_c + atp_c + h_c		55276	0.00060615	BSU33930	Pgk
	CBPS_num1	0.0211573	2.0 atp_c + gln__L_c + h2o_c + hco3_c --> 2.0 adp_c + cbp_c + glu__L_c + h_c + pi_c	6.3.5.5	39.8004	0.000531584	BSU11230 and BSU11240	PyrAA;PyrAB
